# Supplementary material for: Subcellular Localization of Extracytoplasmic Proteins in Monoderm Bacteria: Rational Secretomics-Based Strategy for Genomic and Proteomic Analyses
Source: PubMed Central journal article supplement (PMC3415414; doi:10.1371/journal.pone.0042982), 2012-08-09
Supplement: pone.0042982.s002.pdf [file pone.0042982.s002.pdf]

Table 2S: **Integral membrane proteins (IMPs) in *L. monocytogenes* EGD-e as revealed by the secretomics-based method.**

| Protein ID                                        | Annotation <sup>a</sup>                                          | Protein Type <sup>b</sup> | Secretion pathway        | GO <sup>c</sup>                    |
|---------------------------------------------------|------------------------------------------------------------------|---------------------------|--------------------------|------------------------------------|
| <i>Single-spanning integral membrane proteins</i> |                                                                  |                           |                          |                                    |
| Lmo0058                                           | WXG100 protein secretion system, membrane component, EssA        | ssIMP I                   | Sec, YidC, SPase I       | 0031226, 0005887, 0009986          |
| Lmo0082                                           | Protein of unknown function                                      | ssIMP I                   | Sec, YidC, SPase I       | 0031226, 0005887, 0009986          |
| Lmo0204                                           | Actin-assembly inducing protein, ActA                            | ssIMP I                   | Sec, YidC, SPase I       | 0031226, 0005887, 0009986          |
| Lmo0528                                           | Protein of unknown function, COG5298                             | ssIMP I                   | Sec, YidC, SPase I       | 0031226, 0005887, 0009986          |
| Lmo0530                                           | Protein of unknown function                                      | ssIMP I                   | Sec, YidC, SPase I       | 0031226, 0005887, 0009986          |
| Lmo0552                                           | Protein of unknown function, DUF916 domain, CscA-like            | ssIMP I                   | Sec, YidC, SPase I       | 0031226, 0005887, 0009986          |
| Lmo0586                                           | Protein of unknown function, DUF916 domain, CscA-like            | ssIMP I                   | Sec, YidC, SPase I       | 0031226, 0005887, 0009986          |
| Lmo0701                                           | Protein of unknown function                                      | ssIMP I                   | Sec, YidC, SPase I       | 0031226, 0005887, 0009986          |
| Lmo1021                                           | Signal transduction histidine kinase, LiaS                       | ssIMP I                   | Sec, YidC, SPase I       | 0031226, 0005887, 0009986          |
| Lmo1205                                           | Cobalt transport protein, CbiN                                   | ssIMP I                   | Sec, YidC, SPase I       | 0031226, 0005887, 0009986          |
| Lmo1378                                           | Signal transduction histidine kinase, LisK                       | ssIMP I                   | Sec, YidC, SPase I       | 0031226, 0005887, 0009986          |
| Lmo1461                                           | Protein of unknown function                                      | ssIMP I                   | Sec, YidC, SPase I       | 0031226, 0005887, 0009986          |
| Lmo1610                                           | Protein of unknown function                                      | ssIMP I                   | Sec, YidC, SPase I       | 0031226, 0005887, 0009986          |
| Lmo2061                                           | Protein of unknown function with GLE1 domain, COG4549            | ssIMP I                   | Sec, YidC, SPase I       | 0031226, 0005887, 0009986          |
| Lmo2410                                           | Membrane protein of unknown function                             | ssIMP I                   | Sec, YidC, SPase I       | 0031226, 0005887, 0009986          |
| Lmo2451                                           | Sec translocon, subunit SecG                                     | ssIMP I                   | Sec, YidC, SPase I       | 0031226, 0005887, 0009986          |
| Lmo2534                                           | F <sub>0</sub> F <sub>1</sub> ATP synthase, subunit C            | ssIMP I                   | Sec, YidC, SPase I       | 0031226, 0005887, 0009986          |
| Lmo2706                                           | Protein of unknown function                                      | ssIMP I                   | Sec, YidC, SPase I       | 0031226, 0005887, 0009986          |
| Lmo0821                                           | Lipoprotein of unknown function                                  | ssIMP I-Lipoprotein       | Sec, YidC, Lgt, SPase II | 0031226, 0005887, 0046658, 0009986 |
| Lmo2793                                           | Lipoprotein of unknown function                                  | ssIMP I-Lipoprotein       | Sec, YidC, Lgt, SPase II | 0031226, 0005887, 0046658, 0009986 |
| Lmo0060                                           | WXG100 protein secretion system, membrane component, YukC (EssB) | ssIMP II                  | YidC                     | 0031226, 0005887, 0009986          |
| Lmo0066                                           | Protein of unknown function, COG5444                             | ssIMP II                  | YidC                     | 0031226, 0005887, 0009986          |
| Lmo0292                                           | Trypsin-like serine protease with C-terminal PDZ/DHR/GLGF domain | ssIMP II                  | YidC                     | 0031226, 0005887, 0009986          |
| Lmo0383                                           | Methylmalonate-semialdehyde dehydrogenase                        | ssIMP II                  | YidC                     | 0031226, 0005887, 0009986          |
| Lmo0502                                           | Sugar phosphate isomerase involved in capsule formation          | ssIMP II                  | YidC                     | 0031226, 0005887, 0009986          |
| Lmo0702                                           | Protein of unknown function                                      | ssIMP II                  | YidC                     | 0031226, 0005887, 0009986          |
| Lmo0763                                           | Phosphohydrolases                                                | ssIMP II                  | YidC                     | 0031226, 0005887, 0009986          |

|         |                                                                             |                  |           |                           |
|---------|-----------------------------------------------------------------------------|------------------|-----------|---------------------------|
| Lmo0890 | Sulphate transporter/antisigma-factor antagonist STAS                       | ssIMP II         | YidC      | 0031226, 0005887, 0009986 |
| Lmo0974 | D-alanine--D-alanyl carrier protein ligase                                  | ssIMP II         | YidC      | 0031226, 0005887, 0009986 |
| Lmo1075 | Teichoic acids export protein ATP-binding subunit                           | ssIMP II         | YidC      | 0031226, 0005887, 0009986 |
| Lmo1097 | Protein of unknown function                                                 | ssIMP II         | YidC      | 0031226, 0005887, 0009986 |
| Lmo1106 | ATPase                                                                      | ssIMP II         | YidC      | 0031226, 0005887, 0009986 |
| Lmo1194 | Cobalamin (vitamin B12) biosynthesis CbiD                                   | ssIMP II         | YidC      | 0031226, 0005887, 0009986 |
| Lmo1198 | Cobalamin (vitamin B12) biosynthesis CbiG                                   | ssIMP II         | YidC      | 0031226, 0005887, 0009986 |
| Lmo1374 | Catalytic domain of dehydrogenase complex,biotin/lipoyl attachment          | ssIMP II         | YidC      | 0031226, 0005887, 0009986 |
| Lmo1395 | DNA-binding $\lambda$ repressor-like, COG1426                               | ssIMP II         | YidC      | 0031226, 0005887, 0009986 |
| Lmo1414 | Thiolase                                                                    | ssIMP II         | YidC      | 0031226, 0005887, 0009986 |
| Lmo1433 | Pyruvate/oxoglutarate dehydrogenase complex, dihydrolipoamide dehydrogenase | ssIMP II         | YidC      | 0031226, 0005887, 0009986 |
| Lmo1552 | Valyl-tRNA synthetase, class Ia                                             | ssIMP II         | YidC      | 0031226, 0005887, 0009986 |
| Lmo1663 | Asparagine synthase, glutamine-hydrolyzing                                  | ssIMP II         | YidC      | 0031226, 0005887, 0009986 |
| Lmo1820 | Serine/threonine protein kinase                                             | ssIMP II         | YidC      | 0031226, 0005887, 0009986 |
| Lmo1927 | 3-dehydroquinate synthase, AroB                                             | ssIMP II         | YidC      | 0031226, 0005887, 0009986 |
| Lmo2202 | $\beta$ -ketoacyl-acyl carrier protein synthase III, FabH                   | ssIMP II         | YidC      | 0031226, 0005887, 0009986 |
| Lmo2390 | Thioredoxin reductase                                                       | ssIMP II         | YidC      | 0031226, 0005887, 0009986 |
| Lmo2757 | DNA helicase, ATP-dependent, RecQ type                                      | ssIMP II         | YidC      | 0031226, 0005887, 0009986 |
| Lmo2769 | ABC-type multidrug transport system                                         | ssIMP II         | YidC      | 0031226, 0005887, 0009986 |
| Lmo2833 | Maltose phosphorylase/glycosyl hydrolase/vacuolar acid trehalase            | ssIMP II         | YidC      | 0031226, 0005887, 0009986 |
| Lmo0039 | Carbamate kinase                                                            | ssIMP II, Unc-SP | Sec, YidC | 0031226, 0005887, 0009986 |
| Lmo0052 | Signal transduction phosphoesterase YybT type with GDEF and DHH domains     | ssIMP II, Unc-SP | Sec, YidC | 0031226, 0005887, 0009986 |
| Lmo0089 | F <sub>0</sub> F <sub>1</sub> -type ATP synthase, $\delta$ subunit          | ssIMP II, Unc-SP | Sec, YidC | 0031226, 0005887, 0009986 |
| Lmo0104 | Protein of unknown function                                                 | ssIMP II, Unc-SP | Sec, YidC | 0031226, 0005887, 0009986 |
| Lmo0186 | Protein of unknown function with 3D and G5 domains                          | ssIMP II, Unc-SP | Sec, YidC | 0031226, 0005887, 0009986 |
| Lmo0193 | Macrolide transporter subunit MacA                                          | ssIMP II, Unc-SP | Sec, YidC | 0031226, 0005887, 0009986 |
| Lmo0217 | Septum formation initiator                                                  | ssIMP II, Unc-SP | Sec, YidC | 0031226, 0005887, 0009986 |
| Lmo0245 | Sec translocon, subunit SecE                                                | ssIMP II, Unc-SP | Sec, YidC | 0031226, 0005887, 0009986 |
| Lmo0289 | Signal transduction YycH protein                                            | ssIMP II, Unc-SP | Sec, YidC | 0031226, 0005887, 0009986 |
| Lmo0290 | Protein of unknown function, COG4853                                        | ssIMP II, Unc-SP | Sec, YidC | 0031226, 0005887, 0009986 |
| Lmo0299 | Phosphotransferase system cellobiose-specific component IIB                 | ssIMP II, Unc-SP | Sec, YidC | 0031226, 0005887, 0009986 |
| Lmo0353 | Acyl-CoA N-acyltransferase                                                  | ssIMP II, Unc-SP | Sec, YidC | 0031226, 0005887, 0009986 |

|         |                                                                                      |                  |           |                           |
|---------|--------------------------------------------------------------------------------------|------------------|-----------|---------------------------|
| Lmo0354 | Acyl-coenzyme A synthetase/AMP-(fatty) acid ligase                                   | ssIMP II, Unc-SP | Sec, YidC | 0031226, 0005887, 0009986 |
| Lmo0362 | Twin-arginine translocase protein A, TatA                                            | ssIMP II, Unc-SP | Sec, YidC | 0031226, 0005887, 0009986 |
| Lmo0376 | Transcriptional regulator                                                            | ssIMP II, Unc-SP | Sec, YidC | 0031226, 0005887, 0009986 |
| Lmo0392 | Protein of unknown function with DUF1432, COG4864                                    | ssIMP II, Unc-SP | Sec, YidC | 0031226, 0005887, 0009986 |
| Lmo0393 | Protein of unknown function                                                          | ssIMP II, Unc-SP | Sec, YidC | 0031226, 0005887, 0009986 |
| Lmo0399 | Phosphotransferase system, fructose-specific IIB subunit                             | ssIMP II, Unc-SP | Sec, YidC | 0031226, 0005887, 0009986 |
| Lmo0427 | Phosphotransferase system, fructose-specific IIB subunit                             | ssIMP II, Unc-SP | Sec, YidC | 0031226, 0005887, 0009986 |
| Lmo0441 | Cell division protein FtsI/Penicillin-binding protein 2, transpeptidase              | ssIMP II, Unc-SP | Sec, YidC | 0031226, 0005887, 0009986 |
| Lmo0442 | Protein of unknown function                                                          | ssIMP II, Unc-SP | Sec, YidC | 0031226, 0005887, 0009986 |
| Lmo0443 | Transcriptional regulator                                                            | ssIMP II, Unc-SP | Sec, YidC | 0031226, 0005887, 0009986 |
| Lmo0465 | Protein of unknown function                                                          | ssIMP II, Unc-SP | Sec, YidC | 0031226, 0005887, 0009986 |
| Lmo0477 | Protein of unknown function                                                          | ssIMP II, Unc-SP | Sec, YidC | 0031226, 0005887, 0009986 |
| Lmo0478 | Protein of unknown function                                                          | ssIMP II, Unc-SP | Sec, YidC | 0031226, 0005887, 0009986 |
| Lmo0479 | Protein of unknown function                                                          | ssIMP II, Unc-SP | Sec, YidC | 0031226, 0005887, 0009986 |
| Lmo0481 | Streptococcal 67 kDa myosin-cross-reactive antigen like                              | ssIMP II, Unc-SP | Sec, YidC | 0031226, 0005887, 0009986 |
| Lmo0592 | Protein of unknown function                                                          | ssIMP II, Unc-SP | Sec, YidC | 0031226, 0005887, 0009986 |
| Lmo0595 | O-acetylhomoserine/O-acetylserine sulfhydrylase                                      | ssIMP II, Unc-SP | Sec, YidC | 0031226, 0005887, 0009986 |
| Lmo0628 | Protein of unknown function                                                          | ssIMP II, Unc-SP | Sec, YidC | 0031226, 0005887, 0009986 |
| Lmo0661 | Carboxymuconolactone decarboxylase                                                   | ssIMP II, Unc-SP | Sec, YidC | 0031226, 0005887, 0009986 |
| Lmo0675 | Protein of unknown function                                                          | ssIMP II, Unc-SP | Sec, YidC | 0031226, 0005887, 0009986 |
| Lmo0686 | Flagellar motor protein MotB                                                         | ssIMP II, Unc-SP | Sec, YidC | 0031226, 0005887, 0009986 |
| Lmo0746 | Protein of unknown function                                                          | ssIMP II, Unc-SP | Sec, YidC | 0031226, 0005887, 0009986 |
| Lmo0810 | Spermidine/putrescine ABC transporter, substrate-binding protein                     | ssIMP II, Unc-SP | Sec, YidC | 0031226, 0005887, 0009986 |
| Lmo0914 | Phosphotransferase system, lactose/cellobiose-specific IIB subunit                   | ssIMP II, Unc-SP | Sec, YidC | 0031226, 0005887, 0009986 |
| Lmo0926 | Transcriptional regulator                                                            | ssIMP II, Unc-SP | Sec, YidC | 0031226, 0005887, 0009986 |
| Lmo0929 | Sortase A, SrtA                                                                      | ssIMP II, Unc-SP | Sec, YidC | 0031226, 0005887, 0009986 |
| Lmo0951 | Protein of unknown function with $\alpha/\beta$ -hydrolase fold and DUF1801, COG4814 | ssIMP II, Unc-SP | Sec, YidC | 0031226, 0005887, 0009986 |
| Lmo0962 | Listeria epitope, LemA                                                               | ssIMP II, Unc-SP | Sec, YidC | 0031226, 0005887, 0009986 |
| Lmo0971 | D-alanine esterification of (lipo-)teichoic acid protein, DltD                       | ssIMP II, Unc-SP | Sec, YidC | 0031226, 0005887, 0009986 |
| Lmo1026 | Transcriptional regulator                                                            | ssIMP II, Unc-SP | Sec, YidC | 0031226, 0005887, 0009986 |
| Lmo1049 | Thiamine/molybdopterin biosynthesis ThiF/MoeB-like protein                           | ssIMP II, Unc-SP | Sec, YidC | 0031226, 0005887, 0009986 |
| Lmo1095 | Phosphotransferase system, lactose/cellobiose-specific IIB subunit                   | ssIMP II, Unc-SP | Sec, YidC | 0031226, 0005887, 0009986 |

|         |                                                                    |                  |           |                           |
|---------|--------------------------------------------------------------------|------------------|-----------|---------------------------|
| Lmo1103 | Protein of unknown function                                        | ssIMP II, Unc-SP | Sec, YidC | 0031226, 0005887, 0009986 |
| Lmo1128 | Lysophospholipase                                                  | ssIMP II, Unc-SP | Sec, YidC | 0031226, 0005887, 0009986 |
| Lmo1215 | Muramidase flagellum-specific with a single GW domain, FlgJ-type   | ssIMP II, Unc-SP | Sec, YidC | 0031226, 0005887, 0009986 |
| Lmo1269 | Signal peptidase of Type I, SipX                                   | ssIMP II, Unc-SP | Sec, YidC | 0031226, 0005887, 0009986 |
| Lmo1270 | Signal peptidase of Type I, SipY                                   | ssIMP II, Unc-SP | Sec, YidC | 0031226, 0005887, 0009986 |
| Lmo1271 | Signal peptidase of Type I, SipZ                                   | ssIMP II, Unc-SP | Sec, YidC | 0031226, 0005887, 0009986 |
| Lmo1380 | Protein of unknown function                                        | ssIMP II, Unc-SP | Sec, YidC | 0031226, 0005887, 0009986 |
| Lmo1399 | HD superfamily hydrolase                                           | ssIMP II, Unc-SP | Sec, YidC | 0031226, 0005887, 0009986 |
| Lmo1484 | DNA uptake competence protein, ComEA                               | ssIMP II, Unc-SP | Sec, YidC | 0031226, 0005887, 0009986 |
| Lmo1495 | Protein of unknown function with DUF1510 domain                    | ssIMP II, Unc-SP | Sec, YidC | 0031226, 0005887, 0009986 |
| Lmo1499 | Aminodeoxychorismate lyase                                         | ssIMP II, Unc-SP | Sec, YidC | 0031226, 0005887, 0009986 |
| Lmo1511 | Lysophospholipase                                                  | ssIMP II, Unc-SP | Sec, YidC | 0031226, 0005887, 0009986 |
| Lmo1529 | Sec transcolon, subunit YajC                                       | ssIMP II, Unc-SP | Sec, YidC | 0031226, 0005887, 0009986 |
| Lmo1547 | Cell shape-determining protein, MreC                               | ssIMP II, Unc-SP | Sec, YidC | 0031226, 0005887, 0009986 |
| Lmo1715 | S-adenosyl-L-methionine-dependent methyltransferase type 11        | ssIMP II, Unc-SP | Sec, YidC | 0031226, 0005887, 0009986 |
| Lmo1720 | Phosphotransferase system, lactose/cellobiose-specific IIB subunit | ssIMP II, Unc-SP | Sec, YidC | 0031226, 0005887, 0009986 |
| Lmo1813 | Iron-sulphur-dependent L-serine dehydratase beta subunit           | ssIMP II, Unc-SP | Sec, YidC | 0031226, 0005887, 0009986 |
| Lmo1861 | Protein of unknown function, COG4698                               | ssIMP II, Unc-SP | Sec, YidC | 0031226, 0005887, 0009986 |
| Lmo1892 | Membrane carboxypeptidase (penicillin-binding protein), PbpA       | ssIMP II, Unc-SP | Sec, YidC | 0031226, 0005887, 0009986 |
| Lmo1898 | Protein of unknown function, COG5353                               | ssIMP II, Unc-SP | Sec, YidC | 0031226, 0005887, 0009986 |
| Lmo1924 | Prephenate dehydrogenase                                           | ssIMP II, Unc-SP | Sec, YidC | 0031226, 0005887, 0009986 |
| Lmo2034 | Cell division septal protein, FtsQ                                 | ssIMP II, Unc-SP | Sec, YidC | 0031226, 0005887, 0009986 |
| Lmo2036 | UDP-N-acetylmuramoylalanine-D-glutamate ligase, MurD               | ssIMP II, Unc-SP | Sec, YidC | 0031226, 0005887, 0009986 |
| Lmo2040 | Cell division protein, FtsL -like                                  | ssIMP II, Unc-SP | Sec, YidC | 0031226, 0005887, 0009986 |
| Lmo2051 | Protein of unknown function with PDZ domain                        | ssIMP II, Unc-SP | Sec, YidC | 0031226, 0005887, 0009986 |
| Lmo2056 | Ca <sup>2+</sup> chelating serine protease with SCP/PR1 domain     | ssIMP II, Unc-SP | Sec, YidC | 0031226, 0005887, 0009986 |
| Lmo2089 | Esterase/lipase                                                    | ssIMP II, Unc-SP | Sec, YidC | 0031226, 0005887, 0009986 |
| Lmo2181 | Sortase B, SrtB                                                    | ssIMP II, Unc-SP | Sec, YidC | 0031226, 0005887, 0009986 |
| Lmo2229 | Carboxypeptidase (penicillin-binding protein)                      | ssIMP II, Unc-SP | Sec, YidC | 0031226, 0005887, 0009986 |
| Lmo2257 | Protein of unknown function                                        | ssIMP II, Unc-SP | Sec, YidC | 0031226, 0005887, 0009986 |
| Lmo2258 | Protein of unknown function                                        | ssIMP II, Unc-SP | Sec, YidC | 0031226, 0005887, 0009986 |
| Lmo2280 | Protein of unknown function, COG1422                               | ssIMP II, Unc-SP | Sec, YidC | 0031226, 0005887, 0009986 |

|         |                                                                                     |                               |           |                                    |
|---------|-------------------------------------------------------------------------------------|-------------------------------|-----------|------------------------------------|
| Lmo2373 | Phosphotransferase system, lactose/cellobiose-specific IIB subunit                  | ssIMP II, Unc-SP              | Sec, YidC | 0031226, 0005887, 0009986          |
| Lmo2420 | Protein of unknown function                                                         | ssIMP II, Unc-SP              | Sec, YidC | 0031226, 0005887, 0009986          |
| Lmo2442 | Protein of unknown function, DUF218 domain, COG1434                                 | ssIMP II, Unc-SP              | Sec, YidC | 0031226, 0005887, 0009986          |
| Lmo2485 | Stress-responsive transcriptional regulator                                         | ssIMP II, Unc-SP              | Sec, YidC | 0031226, 0005887, 0009986          |
| Lmo2486 | Protein of unknown function, UCP012569 type, COG3595                                | ssIMP II, Unc-SP              | Sec, YidC | 0031226, 0005887, 0009986          |
| Lmo2518 | Transcriptional regulator                                                           | ssIMP II, Unc-SP              | Sec, YidC | 0031226, 0005887, 0009986          |
| Lmo2680 | K <sup>+</sup> transporting ATPase, C subunit, KdpC                                 | ssIMP II, Unc-SP              | Sec, YidC | 0031226, 0005887, 0009986          |
| Lmo2683 | Phosphotransferase system, lactose/cellobiose-specific IIB subunit                  | ssIMP II, Unc-SP              | Sec, YidC | 0031226, 0005887, 0009986          |
| Lmo2710 | Protein of unknown function                                                         | ssIMP II, Unc-SP              | Sec, YidC | 0031226, 0005887, 0009986          |
| Lmo2762 | Phosphotransferase system, lactose/cellobiose-specific IIB subunit                  | ssIMP II, Unc-SP              | Sec, YidC | 0031226, 0005887, 0009986          |
| Lmo2805 | Protein of unknown function with DUF1310 domain                                     | ssIMP II, Unc-SP              | Sec, YidC | 0031226, 0005887, 0009986          |
| Lmo2806 | Protein of unknown function with DUF1310 domain                                     | ssIMP II, Unc-SP              | Sec, YidC | 0031226, 0005887, 0009986          |
| Lmo2807 | Protein of unknown function with DUF1310 domain                                     | ssIMP II, Unc-SP              | Sec, YidC | 0031226, 0005887, 0009986          |
| Lmo2808 | Protein of unknown function with DUF1310 domain                                     | ssIMP II, Unc-SP              | Sec, YidC | 0031226, 0005887, 0009986          |
| Lmo2809 | Protein of unknown function with DUF1310 domain                                     | ssIMP II, Unc-SP              | Sec, YidC | 0031226, 0005887, 0009986          |
| Lmo1303 | Cell division suppressor protein, YneA, with LysM domain                            | ssIMP II-LysM-protein, Unc-SP | Sec, YidC | 0031226, 0005887, 0009275, 0009986 |
| Lmo1941 | Protein of unknown function, YpbE-like, LysM and ATPase domains                     | ssIMP II-LysM-protein, Unc-SP | Sec, YidC | 0031226, 0005887, 0009275, 0009986 |
| Lmo0069 | Protein of unknown function                                                         | ssIMP III                     | YidC      | 0031226, 0005887, 0009986          |
| Lmo0504 | Protein of unknown function                                                         | ssIMP III                     | YidC      | 0031226, 0005887, 0009986          |
| Lmo0545 | Transcriptional activator                                                           | ssIMP III                     | YidC      | 0031226, 0005887, 0009986          |
| Lmo0825 | Hydroxymethylglutaryl-CoA reductase                                                 | ssIMP III                     | YidC      | 0031226, 0005887, 0009986          |
| Lmo1088 | Glycosyl/glycerophosphate transferases involved in teichoic acid biosynthesis, TagB | ssIMP III                     | YidC      | 0031226, 0005887, 0009986          |
| Lmo1238 | Ribonuclease PH                                                                     | ssIMP III                     | YidC      | 0031226, 0005887, 0009986          |
| Lmo1306 | Protein of unknown function, COG3763                                                | ssIMP III                     | YidC      | 0031226, 0005887, 0009986          |
| Lmo1351 | Rhodanese-related sulfurtransferase                                                 | ssIMP III                     | YidC      | 0031226, 0005887, 0009986          |
| Lmo1412 | Topology modulation protein                                                         | ssIMP III                     | YidC      | 0031226, 0005887, 0009986          |
| Lmo1538 | Glycerol kinase                                                                     | ssIMP III                     | YidC      | 0031226, 0005887, 0009986          |
| Lmo1594 | Negative regulator of septation ring formation                                      | ssIMP III                     | YidC      | 0031226, 0005887, 0009986          |
| Lmo1885 | Xanthine phosphoribosyltransferase                                                  | ssIMP III                     | YidC      | 0031226, 0005887, 0009986          |
| Lmo2302 | Protein of unknown function                                                         | ssIMP III                     | YidC      | 0031226, 0005887, 0009986          |
| Lmo2325 | Protein of unknown function                                                         | ssIMP III                     | YidC      | 0031226, 0005887, 0009986          |
| Lmo2533 | F <sub>0</sub> F <sub>1</sub> ATP synthase, subunit B                               | ssIMP III                     | YidC      | 0031226, 0005887, 0009986          |

|                                                  |                                                                                    |           |      |                           |
|--------------------------------------------------|------------------------------------------------------------------------------------|-----------|------|---------------------------|
| Lmo2664                                          | Threonine dehydrogenase, Zn-dependent dehydrogenase                                | ssIMP III | YidC | 0031226, 0005887, 0009986 |
| Lmo2836                                          | Threonine dehydrogenase, Zn-dependent dehydrogenase                                | ssIMP III | YidC | 0031226, 0005887, 0009986 |
| <i>Multi-spanning integral membrane proteins</i> |                                                                                    |           |      |                           |
| Lmo0014                                          | Cytochrome AA3-600 quinol oxidase, subunit I                                       | msIMP     | YidC | 0031226, 0005887, 0009986 |
| Lmo0024                                          | Phosphotransferase system, mannose/fructose/sorbose/N-acetylglactosamine IID       | msIMP     | YidC | 0031226, 0005887, 0009986 |
| Lmo0027                                          | Phosphotransferase system, $\beta$ -glucoside-specific IIBC component              | msIMP     | YidC | 0031226, 0005887, 0009986 |
| Lmo0048                                          | Post-translational modification protein of the autoinducing quorum-sensing peptide | msIMP     | YidC | 0031226, 0005887, 0009986 |
| Lmo0061                                          | WXG100 protein secretion system, ATPase component, YukAB (EssC)                    | msIMP     | YidC | 0031226, 0005887, 0009986 |
| Lmo0098                                          | Phosphotransferase system, mannose/fructose/sorbose family IID component           | msIMP     | YidC | 0031226, 0005887, 0009986 |
| Lmo0121                                          | Phage-related protein                                                              | msIMP     | YidC | 0031226, 0005887, 0009986 |
| Lmo0155                                          | ABC-type Mn <sup>2+</sup> /Zn <sup>2+</sup> transport system, permease component   | msIMP     | YidC | 0031226, 0005887, 0009986 |
| Lmo0176                                          | Sugar uptake permease                                                              | msIMP     | YidC | 0031226, 0005887, 0009986 |
| Lmo0321                                          | Protein of unknown function                                                        | msIMP     | YidC | 0031226, 0005887, 0009986 |
| Lmo0332                                          | Protein of unknown function                                                        | msIMP     | YidC | 0031226, 0005887, 0009986 |
| Lmo0349                                          | Protein of unknown function                                                        | msIMP     | YidC | 0031226, 0005887, 0009986 |
| Lmo0358                                          | Phosphotransferase system, fructose IIC component                                  | msIMP     | YidC | 0031226, 0005887, 0009986 |
| Lmo0405                                          | Phosphate transporter                                                              | msIMP     | YidC | 0031226, 0005887, 0009986 |
| Lmo0424                                          | Sugar transport                                                                    | msIMP     | YidC | 0031226, 0005887, 0009986 |
| Lmo0459                                          | M trans-acting positive regulator                                                  | msIMP     | YidC | 0031226, 0005887, 0009986 |
| Lmo0508                                          | Phosphotransferase system, galactitol-specific IIC component                       | msIMP     | YidC | 0031226, 0005887, 0009986 |
| Lmo0518                                          | Protein of unknown function with DUF1304, COG3759                                  | msIMP     | YidC | 0031226, 0005887, 0009986 |
| Lmo0529                                          | Glycosyltransferases, probably involved in cell wall biogenesis                    | msIMP     | YidC | 0031226, 0005887, 0009986 |
| Lmo0543                                          | Phosphotransferase system sorbitol-specific component IIBC                         | msIMP     | YidC | 0031226, 0005887, 0009986 |
| Lmo0559                                          | Mg <sup>2+</sup> and Co <sup>2+</sup> transporters                                 | msIMP     | YidC | 0031226, 0005887, 0009986 |
| Lmo0577                                          | Protein of unknown function, COG3610                                               | msIMP     | YidC | 0031226, 0005887, 0009986 |
| Lmo0578                                          | Threonine/serine exporter family, ThrE                                             | msIMP     | YidC | 0031226, 0005887, 0009986 |
| Lmo0589                                          | Protein of unknown function, COG4852                                               | msIMP     | YidC | 0031226, 0005887, 0009986 |
| Lmo0604                                          | Protein of unknown function                                                        | msIMP     | YidC | 0031226, 0005887, 0009986 |
| Lmo0618                                          | Protein kinase-like                                                                | msIMP     | YidC | 0031226, 0005887, 0009986 |
| Lmo0647                                          | Protein of unknown function                                                        | msIMP     | YidC | 0031226, 0005887, 0009986 |
| Lmo0648                                          | Mg <sup>2+</sup> and Co <sup>2+</sup> transporters                                 | msIMP     | YidC | 0031226, 0005887, 0009986 |
| Lmo0722                                          | Pyruvate oxidase                                                                   | msIMP     | YidC | 0031226, 0005887, 0009986 |

|         |                                                                                         |       |      |                           |
|---------|-----------------------------------------------------------------------------------------|-------|------|---------------------------|
| Lmo0733 | Lambda repressor-like, DNA-binding                                                      | msIMP | YidC | 0031226, 0005887, 0009986 |
| Lmo0738 | $\beta$ -glucoside-specific PTS system components IIABC                                 | msIMP | YidC | 0031226, 0005887, 0009986 |
| Lmo0744 | ABC-type antimicrobial peptide transport system, ATPase component                       | msIMP | YidC | 0031226, 0005887, 0009986 |
| Lmo0779 | Protein of unknown function with DUF986 domain, COG4811                                 | msIMP | YidC | 0031226, 0005887, 0009986 |
| Lmo0781 | Phosphotransferase system, mannose/fructose/sorbose family IID component                | msIMP | YidC | 0031226, 0005887, 0009986 |
| Lmo0793 | Protein of unknown function with DUF554 domain, COG1811                                 | msIMP | YidC | 0031226, 0005887, 0009986 |
| Lmo0803 | Na <sup>+</sup> /H <sup>+</sup> antiporter                                              | msIMP | YidC | 0031226, 0005887, 0009986 |
| Lmo0826 | Na <sup>+</sup> /phosphate symporter                                                    | msIMP | YidC | 0031226, 0005887, 0009986 |
| Lmo0867 | Protein of unknown function with DUF988 domain, COG4708                                 | msIMP | YidC | 0031226, 0005887, 0009986 |
| Lmo0910 | Protein of unknown function, UCP032908-like, COG4194                                    | msIMP | YidC | 0031226, 0005887, 0009986 |
| Lmo0933 | Undecaprenyl phosphate 4-deoxy-4-formamido-L-arabinose transferase                      | msIMP | YidC | 0031226, 0005887, 0009986 |
| Lmo0992 | Tellurium resistance membrane protein, TerC                                             | msIMP | YidC | 0031226, 0005887, 0009986 |
| Lmo0993 | Cation transporter                                                                      | msIMP | YidC | 0031226, 0005887, 0009986 |
| Lmo1013 | Mechanosensitive ion channel MscS                                                       | msIMP | YidC | 0031226, 0005887, 0009986 |
| Lmo1015 | ABC-type proline/glycine betaine transport system, permease component, GbuB             | msIMP | YidC | 0031226, 0005887, 0009986 |
| Lmo1035 | Phosphotransferase system, beta-glucoside-specific IIABC component                      | msIMP | YidC | 0031226, 0005887, 0009986 |
| Lmo1064 | Mg <sup>2+</sup> and Co <sup>2+</sup> transporters, CorA-like                           | msIMP | YidC | 0031226, 0005887, 0009986 |
| Lmo1167 | Aquaporin, glycerol uptake facilitator, GlpF                                            | msIMP | YidC | 0031226, 0005887, 0009986 |
| Lmo1214 | Protein of unknown function                                                             | msIMP | YidC | 0031226, 0005887, 0009986 |
| Lmo1230 | Colicin V production protein                                                            | msIMP | YidC | 0031226, 0005887, 0009986 |
| Lmo1255 | Phosphotransferase system, trehalose-specific IIBC component                            | msIMP | YidC | 0031226, 0005887, 0009986 |
| Lmo1261 | Protein of unknown function with GYF domain                                             | msIMP | YidC | 0031226, 0005887, 0009986 |
| Lmo1284 | Protein of unknown function with DUF205 domain, COG0344                                 | msIMP | YidC | 0031226, 0005887, 0009986 |
| Lmo1318 | Peptidase M50, putative membrane-associated zinc metallopeptidase                       | msIMP | YidC | 0031226, 0005887, 0009986 |
| Lmo1337 | Peptidase S54, rhomboid                                                                 | msIMP | YidC | 0031226, 0005887, 0009986 |
| Lmo1346 | Fimbrilin-protein exporter, membrane component, ComGB                                   | msIMP | YidC | 0031226, 0005887, 0009986 |
| Lmo1353 | Protein of unknown function with DUF1385 domain, COG3872                                | msIMP | YidC | 0031226, 0005887, 0009986 |
| Lmo1422 | ABC-type proline/glycine betaine system, oxgall and bile exclusion system, BileB        | msIMP | YidC | 0031226, 0005887, 0009986 |
| Lmo1425 | ABC-type proline/glycine betaine transport systems, permease component, OpuCD           | msIMP | YidC | 0031226, 0005887, 0009986 |
| Lmo1427 | ABC-type proline/glycine betaine transport systems, permease component, OpuCB           | msIMP | YidC | 0031226, 0005887, 0009986 |
| Lmo1443 | Branched-chain amino acid transporter                                                   | msIMP | YidC | 0031226, 0005887, 0009986 |
| Lmo1446 | ABC-type Mn <sup>2+</sup> /Zn <sup>2+</sup> transport systems, permease component, ZurM | msIMP | YidC | 0031226, 0005887, 0009986 |

|         |                                                                                 |       |      |                           |
|---------|---------------------------------------------------------------------------------|-------|------|---------------------------|
| Lmo1482 | Competence protein ComEC/Rec2                                                   | msIMP | YidC | 0031226, 0005887, 0009986 |
| Lmo1500 | Selenite transport protein, SNARE-associated protein                            | msIMP | YidC | 0031226, 0005887, 0009986 |
| Lmo1516 | Ammonium permease                                                               | msIMP | YidC | 0031226, 0005887, 0009986 |
| Lmo1539 | Major intrinsic protein                                                         | msIMP | YidC | 0031226, 0005887, 0009986 |
| Lmo1650 | Protein of unknown function with DUF1453 domain, COG4846                        | msIMP | YidC | 0031226, 0005887, 0009986 |
| Lmo1665 | Protein of unknown function                                                     | msIMP | YidC | 0031226, 0005887, 0009986 |
| Lmo1740 | ABC-type amino acid transport system, permease component                        | msIMP | YidC | 0031226, 0005887, 0009986 |
| Lmo1776 | Protein of unknown function, COG4843                                            | msIMP | YidC | 0031226, 0005887, 0009986 |
| Lmo1812 | L-serine dehydratase, alpha subunit                                             | msIMP | YidC | 0031226, 0005887, 0009986 |
| Lmo1844 | Signal peptidase of Type II, lipoprotein signal peptidase, LspA                 | msIMP | YidC | 0031226, 0005887, 0009986 |
| Lmo1853 | Heavy metal translocating P-type ATPase                                         | msIMP | YidC | 0031226, 0005887, 0009986 |
| Lmo1911 | Protein with GGDEF domain                                                       | msIMP | YidC | 0031226, 0005887, 0009986 |
| Lmo1912 | Protein with GGDEF domain                                                       | msIMP | YidC | 0031226, 0005887, 0009986 |
| Lmo1919 | Zinc metallopeptidase                                                           | msIMP | YidC | 0031226, 0005887, 0009986 |
| Lmo1971 | Sugar-specific PTS, UlaA                                                        | msIMP | YidC | 0031226, 0005887, 0009986 |
| Lmo1999 | Glucosamine 6-phosphate synthetase, amidotransferase and phosphosugar isomerase | msIMP | YidC | 0031226, 0005887, 0009986 |
| Lmo2000 | Phosphotransferase system, mannose/fructose/sorbose family IID component        | msIMP | YidC | 0031226, 0005887, 0009986 |
| Lmo2029 | Protein of unknown function, YGGT-like, COG0762                                 | msIMP | YidC | 0031226, 0005887, 0009986 |
| Lmo2037 | UDP-N- phosphotransferase, MraY                                                 | msIMP | YidC | 0031226, 0005887, 0009986 |
| Lmo2075 | O-sialoglycoprotein endopeptidase                                               | msIMP | YidC | 0031226, 0005887, 0009986 |
| Lmo2081 | Camphor resistance CrcB protein                                                 | msIMP | YidC | 0031226, 0005887, 0009986 |
| Lmo2096 | Phosphotransferase system, galactitol-specific IIC component                    | msIMP | YidC | 0031226, 0005887, 0009986 |
| Lmo2105 | Fe <sup>2+</sup> transport system protein B                                     | msIMP | YidC | 0031226, 0005887, 0009986 |
| Lmo2120 | Protein of unknown function with DUF147 domain, CHP00159-like, COG1624          | msIMP | YidC | 0031226, 0005887, 0009986 |
| Lmo2170 | 2-nitropropane dioxygenase, NPD                                                 | msIMP | YidC | 0031226, 0005887, 0009986 |
| Lmo2174 | Protein with GGDEF domain                                                       | msIMP | YidC | 0031226, 0005887, 0009986 |
| Lmo2221 | Protein of unknown function, P-loop nucleoside triphosphate hydrolases, COG4717 | msIMP | YidC | 0031226, 0005887, 0009986 |
| Lmo2224 | Protein of unknown function with DUF445 domain, UCP032178-like, COG4399         | msIMP | YidC | 0031226, 0005887, 0009986 |
| Lmo2287 | Tape measure domain bacteriophage A118                                          | msIMP | YidC | 0031226, 0005887, 0009986 |
| Lmo2335 | 2-O-a-mannosyl-D-glycerate specific PTS transporten components IIABC            | msIMP | YidC | 0031226, 0005887, 0009986 |
| Lmo2347 | ABC-type amino acid transport system, permease component                        | msIMP | YidC | 0031226, 0005887, 0009986 |
| Lmo2367 | Phosphoglucose isomerase                                                        | msIMP | YidC | 0031226, 0005887, 0009986 |



|         |                                                                               |               |           |                           |
|---------|-------------------------------------------------------------------------------|---------------|-----------|---------------------------|
| Lmo2378 | Na(+)/H(+) antiporter subunit A, MnhA                                         | msIMP         | YidC      | 0031226, 0005887, 0009986 |
| Lmo2380 | Multisubunit Na+/H+ antiporter, MnhB subunit                                  | msIMP         | YidC      | 0031226, 0005887, 0009986 |
| Lmo2381 | Monovalent cation/H+ antiporter subunit D                                     | msIMP         | YidC      | 0031226, 0005887, 0009986 |
| Lmo2383 | Monovalent cation/H+ antiporter subunit F                                     | msIMP         | YidC      | 0031226, 0005887, 0009986 |
| Lmo2482 | Prolipoprotein diacylglyceryltransferase, Lgt                                 | msIMP         | YidC      | 0031226, 0005887, 0009986 |
| Lmo2490 | Protein of unknown function, COG4897                                          | msIMP         | YidC      | 0031226, 0005887, 0009986 |
| Lmo2502 | PDZ/DHR/GLGF                                                                  | msIMP         | YidC      | 0031226, 0005887, 0009986 |
| Lmo2519 | Glycosyl transferase, family 4                                                | msIMP         | YidC      | 0031226, 0005887, 0009986 |
| Lmo2526 | UDP-N-acetylglucosamine enolpyruvyl transferase                               | msIMP         | YidC      | 0031226, 0005887, 0009986 |
| Lmo2550 | Undecaprenyl phosphate 4-deoxy-4-formamido-L-arabinose transferase            | msIMP         | YidC      | 0031226, 0005887, 0009986 |
| Lmo2602 | MgtC/SapB transporter                                                         | msIMP         | YidC      | 0031226, 0005887, 0009986 |
| Lmo2638 | NADH dehydrogenase, FAD-containing subunit                                    | msIMP         | YidC      | 0031226, 0005887, 0009986 |
| Lmo2641 | Terpenoid synthase                                                            | msIMP         | YidC      | 0031226, 0005887, 0009986 |
| Lmo2649 | Sugar-specific PTS, UlaA                                                      | msIMP         | YidC      | 0031226, 0005887, 0009986 |
| Lmo2665 | Phosphotransferase system, galactitol-specific IIC component                  | msIMP         | YidC      | 0031226, 0005887, 0009986 |
| Lmo2669 | Protein of unknown function with DUF1113 domain, COG4905                      | msIMP         | YidC      | 0031226, 0005887, 0009986 |
| Lmo2679 | Osmosensitive K+ channel histidine kinase                                     | msIMP         | YidC      | 0031226, 0005887, 0009986 |
| Lmo2682 | K+ transporting ATPase, A subunit, KdpA                                       | msIMP         | YidC      | 0031226, 0005887, 0009986 |
| Lmo2717 | Cytochrome bd-type quinol oxidase, subunit 2, CydB                            | msIMP         | YidC      | 0031226, 0005887, 0009986 |
| Lmo2718 | Cytochrome bd-type quinol oxidase, subunit 1, CydA                            | msIMP         | YidC      | 0031226, 0005887, 0009986 |
| Lmo2733 | 2-O-a-mannosyl-D-glycerate specific PTS transporten components IIABC          | msIMP         | YidC      | 0031226, 0005887, 0009986 |
| Lmo2767 | Protein of unknown function, UCP033111-like, COG4858                          | msIMP         | YidC      | 0031226, 0005887, 0009986 |
| Lmo2772 | Phosphotransferase system, beta-glucoside-specific IIABC component            | msIMP         | YidC      | 0031226, 0005887, 0009986 |
| Lmo2778 | Protein of unknown function                                                   | msIMP         | YidC      | 0031226, 0005887, 0009986 |
| Lmo2787 | Phosphotransferase system, $\beta$ -glucoside-specific IIABC component, BvrB  | msIMP         | YidC      | 0031226, 0005887, 0009986 |
| Lmo0003 | Na+-driven multi antimicrobial extrusion protein MatE                         | msIMP, Unc-SP | Sec, YidC | 0031226, 0005887, 0009986 |
| Lmo0008 | Cardiolipin synthetase                                                        | msIMP, Unc-SP | Sec, YidC | 0031226, 0005887, 0009986 |
| Lmo0015 | Cytochrome AA3-600 quinol oxidase, subunit III                                | msIMP, Unc-SP | Sec, YidC | 0031226, 0005887, 0009986 |
| Lmo0016 | Cytochrome AA3-600 quinol oxidase, subunit IV, QoxD                           | msIMP, Unc-SP | Sec, YidC | 0031226, 0005887, 0009986 |
| Lmo0023 | Phosphotransferase system, mannose/fructose/sorbose/N-acetylgalactosamine IIC | msIMP, Unc-SP | Sec, YidC | 0031226, 0005887, 0009986 |
| Lmo0034 | Phosphotransferase system, lactose/cellobiose IIC component                   | msIMP, Unc-SP | Sec, YidC | 0031226, 0005887, 0009986 |
| Lmo0042 | Selenite transport protein, SNARE-associated protein, DedA                    | msIMP, Unc-SP | Sec, YidC | 0031226, 0005887, 0009986 |

|         |                                                                             |               |           |                           |
|---------|-----------------------------------------------------------------------------|---------------|-----------|---------------------------|
| Lmo0050 | Signal transduction protein with a C-terminal ATPase domain                 | msIMP, Unc-SP | Sec, YidC | 0031226, 0005887, 0009986 |
| Lmo0070 | Protein of unknown function                                                 | msIMP, Unc-SP | Sec, YidC | 0031226, 0005887, 0009986 |
| Lmo0073 | Protein of unknown function                                                 | msIMP, Unc-SP | Sec, YidC | 0031226, 0005887, 0009986 |
| Lmo0074 | Protein of unknown function                                                 | msIMP, Unc-SP | Sec, YidC | 0031226, 0005887, 0009986 |
| Lmo0088 | F0F1-type ATP synthase, subunit c                                           | msIMP, Unc-SP | Sec, YidC | 0031226, 0005887, 0009986 |
| Lmo0094 | Protein of unknown function                                                 | msIMP, Unc-SP | Sec, YidC | 0031226, 0005887, 0009986 |
| Lmo0097 | Phosphotransferase system, mannose/fructose/sorbose family IIC component    | msIMP, Unc-SP | Sec, YidC | 0031226, 0005887, 0009986 |
| Lmo0107 | ABC-type bacteriocin/lantibiotic exporters, ATP-binding/permease protein    | msIMP, Unc-SP | Sec, YidC | 0031226, 0005887, 0009986 |
| Lmo0108 | ABC-type bacteriocin/lantibiotic exporters, ATP-binding/permease protein    | msIMP, Unc-SP | Sec, YidC | 0031226, 0005887, 0009986 |
| Lmo0128 | Holin TcdE-like                                                             | msIMP, Unc-SP | Sec, YidC | 0031226, 0005887, 0009986 |
| Lmo0137 | ABC-type dipeptide/oligopeptide/nickel transport system, permease component | msIMP, Unc-SP | Sec, YidC | 0031226, 0005887, 0009986 |
| Lmo0180 | ABC-type sugar transport system, permease component                         | msIMP, Unc-SP | Sec, YidC | 0031226, 0005887, 0009986 |
| Lmo0195 | ABC-type macrolide transport system, permease component                     | msIMP, Unc-SP | Sec, YidC | 0031226, 0005887, 0009986 |
| Lmo0215 | Polysaccharide biosynthesis protein                                         | msIMP, Unc-SP | Sec, YidC | 0031226, 0005887, 0009986 |
| Lmo0220 | Peptidase M41, FtsH                                                         | msIMP, Unc-SP | Sec, YidC | 0031226, 0005887, 0009986 |
| Lmo0253 | Peptidase M56, BlaR1                                                        | msIMP, Unc-SP | Sec, YidC | 0031226, 0005887, 0009986 |
| Lmo0283 | ABC-type metal ion transport system, permease component                     | msIMP, Unc-SP | Sec, YidC | 0031226, 0005887, 0009986 |
| Lmo0288 | Signal transduction histidine kinase                                        | msIMP, Unc-SP | Sec, YidC | 0031226, 0005887, 0009986 |
| Lmo0296 | Protein of unknown function                                                 | msIMP, Unc-SP | Sec, YidC | 0031226, 0005887, 0009986 |
| Lmo0298 | Phosphotransferase system cellobiose-specific component IIC                 | msIMP, Unc-SP | Sec, YidC | 0031226, 0005887, 0009986 |
| Lmo0350 | Protein of unknown function                                                 | msIMP, Unc-SP | Sec, YidC | 0031226, 0005887, 0009986 |
| Lmo0361 | Twin-arginine translocase protein C, TatC                                   | msIMP, Unc-SP | Sec, YidC | 0031226, 0005887, 0009986 |
| Lmo0373 | Phosphotransferase system cellobiose-specific component IIC                 | msIMP, Unc-SP | Sec, YidC | 0031226, 0005887, 0009986 |
| Lmo0388 | Protein of unknown function                                                 | msIMP, Unc-SP | Sec, YidC | 0031226, 0005887, 0009986 |
| Lmo0389 | Low temperature requirement protein A, LtrA                                 | msIMP, Unc-SP | Sec, YidC | 0031226, 0005887, 0009986 |
| Lmo0400 | Phosphotransferase system, fructose-specific IIC component                  | msIMP, Unc-SP | Sec, YidC | 0031226, 0005887, 0009986 |
| Lmo0403 | Protein of unknown function                                                 | msIMP, Unc-SP | Sec, YidC | 0031226, 0005887, 0009986 |
| Lmo0417 | Protein of unknown function                                                 | msIMP, Unc-SP | Sec, YidC | 0031226, 0005887, 0009986 |
| Lmo0419 | Protein of unknown function with DUF1211 and , COG3548                      | msIMP, Unc-SP | Sec, YidC | 0031226, 0005887, 0009986 |
| Lmo0421 | Cell division membrane protein                                              | msIMP, Unc-SP | Sec, YidC | 0031226, 0005887, 0009986 |
| Lmo0428 | Phosphotransferase system, fructose-specific IIC component                  | msIMP, Unc-SP | Sec, YidC | 0031226, 0005887, 0009986 |
| Lmo0450 | Protein of unknown function with DUF1275 and , COG3619                      | msIMP, Unc-SP | Sec, YidC | 0031226, 0005887, 0009986 |

|         |                                                                              |               |           |                           |
|---------|------------------------------------------------------------------------------|---------------|-----------|---------------------------|
| Lmo0452 | Transglutaminase-like                                                        | msIMP, Unc-SP | Sec, YidC | 0031226, 0005887, 0009986 |
| Lmo0453 | Protein of unknown function with DUF58 domain, COG1721                       | msIMP, Unc-SP | Sec, YidC | 0031226, 0005887, 0009986 |
| Lmo0456 | Purine-cytosine permease and related proteins                                | msIMP, Unc-SP | Sec, YidC | 0031226, 0005887, 0009986 |
| Lmo0475 | Protein of unknown function                                                  | msIMP, Unc-SP | Sec, YidC | 0031226, 0005887, 0009986 |
| Lmo0495 | Protein of unknown function with DUF6, COG0697                               | msIMP, Unc-SP | Sec, YidC | 0031226, 0005887, 0009986 |
| Lmo0519 | Drug resistance transporter EmrB/QacA subfamily                              | msIMP, Unc-SP | Sec, YidC | 0031226, 0005887, 0009986 |
| Lmo0523 | Protein of unknown function                                                  | msIMP, Unc-SP | Sec, YidC | 0031226, 0005887, 0009986 |
| Lmo0524 | Sulfate permease, transporter MFS superfamily                                | msIMP, Unc-SP | Sec, YidC | 0031226, 0005887, 0009986 |
| Lmo0527 | Protein of unknown function                                                  | msIMP, Unc-SP | Sec, YidC | 0031226, 0005887, 0009986 |
| Lmo0531 | Protein of unknown function and GGDEF domain                                 | msIMP, Unc-SP | Sec, YidC | 0031226, 0005887, 0009986 |
| Lmo0544 | Phosphotransferase system, enzyme II sorbitol-specific factor                | msIMP, Unc-SP | Sec, YidC | 0031226, 0005887, 0009986 |
| Lmo0555 | Amino acid/peptide transporter                                               | msIMP, Unc-SP | Sec, YidC | 0031226, 0005887, 0009986 |
| Lmo0573 | Xanthine/uracil/vitamin C permease                                           | msIMP, Unc-SP | Sec, YidC | 0031226, 0005887, 0009986 |
| Lmo0584 | Autoinducer-2 exporter family, AI-2E (PerM)                                  | msIMP, Unc-SP | Sec, YidC | 0031226, 0005887, 0009986 |
| Lmo0593 | Formate/nitrite family of transporters                                       | msIMP, Unc-SP | Sec, YidC | 0031226, 0005887, 0009986 |
| Lmo0596 | Acid-resistance membrane protein, COG3247                                    | msIMP, Unc-SP | Sec, YidC | 0031226, 0005887, 0009986 |
| Lmo0600 | Protein of unknown function with DUF1700 domain and , COG3752                | msIMP, Unc-SP | Sec, YidC | 0031226, 0005887, 0009986 |
| Lmo0603 | Protein of unknown function                                                  | msIMP, Unc-SP | Sec, YidC | 0031226, 0005887, 0009986 |
| Lmo0605 | Na <sup>+</sup> -driven multidrug efflux pump                                | msIMP, Unc-SP | Sec, YidC | 0031226, 0005887, 0009986 |
| Lmo0607 | ABC-type bacteriocin/lantibiotic exporters, ATP-binding/permease protein     | msIMP, Unc-SP | Sec, YidC | 0031226, 0005887, 0009986 |
| Lmo0608 | ABC-type bacteriocin/lantibiotic exporters, ATP-binding/permease protein     | msIMP, Unc-SP | Sec, YidC | 0031226, 0005887, 0009986 |
| Lmo0616 | Glycerophosphoryl diester phosphodiesterase                                  | msIMP, Unc-SP | Sec, YidC | 0031226, 0005887, 0009986 |
| Lmo0621 | Permease, COG0730                                                            | msIMP, Unc-SP | Sec, YidC | 0031226, 0005887, 0009986 |
| Lmo0622 | Protein of unknown function                                                  | msIMP, Unc-SP | Sec, YidC | 0031226, 0005887, 0009986 |
| Lmo0639 | Protein of unknown function                                                  | msIMP, Unc-SP | Sec, YidC | 0031226, 0005887, 0009986 |
| Lmo0642 | Protein of unknown function                                                  | msIMP, Unc-SP | Sec, YidC | 0031226, 0005887, 0009986 |
| Lmo0644 | Membrane-bound phosphoglycerol transferase, alkaline phosphatase superfamily | msIMP, Unc-SP | Sec, YidC | 0031226, 0005887, 0009986 |
| Lmo0645 | Amino acid/polyamine transporter I                                           | msIMP, Unc-SP | Sec, YidC | 0031226, 0005887, 0009986 |
| Lmo0653 | Protein of unknown function with DUF975 domain, COG5523                      | msIMP, Unc-SP | Sec, YidC | 0031226, 0005887, 0009986 |
| Lmo0656 | Protein of unknown function with DUF420 domain, COG2322                      | msIMP, Unc-SP | Sec, YidC | 0031226, 0005887, 0009986 |
| Lmo0668 | ABC-type polysaccharide/polyol phosphate export system, permease component   | msIMP, Unc-SP | Sec, YidC | 0031226, 0005887, 0009986 |
| Lmo0672 | Protein of unknown function with DUF805 domain and , COG3152                 | msIMP, Unc-SP | Sec, YidC | 0031226, 0005887, 0009986 |

|         |                                                                               |               |           |                           |
|---------|-------------------------------------------------------------------------------|---------------|-----------|---------------------------|
| Lmo0677 | Flagellar export apparatus, membrane subunit FliQ                             | msIMP, Unc-SP | Sec, YidC | 0031226, 0005887, 0009986 |
| Lmo0679 | Flagellar export apparatus, membrane subunit FlhB                             | msIMP, Unc-SP | Sec, YidC | 0031226, 0005887, 0009986 |
| Lmo0680 | Flagellar export apparatus, membrane subunit FlhA                             | msIMP, Unc-SP | Sec, YidC | 0031226, 0005887, 0009986 |
| Lmo0685 | Flagellar motor protein MotA                                                  | msIMP, Unc-SP | Sec, YidC | 0031226, 0005887, 0009986 |
| Lmo0713 | Flagellar MS-ring protein, FlIF                                               | msIMP, Unc-SP | Sec, YidC | 0031226, 0005887, 0009986 |
| Lmo0723 | Chemotaxis methyl-accepting receptor, signalling                              | msIMP, Unc-SP | Sec, YidC | 0031226, 0005887, 0009986 |
| Lmo0731 | Protein of unknown function                                                   | msIMP, Unc-SP | Sec, YidC | 0031226, 0005887, 0009986 |
| Lmo0743 | Protein of unknown function                                                   | msIMP, Unc-SP | Sec, YidC | 0031226, 0005887, 0009986 |
| Lmo0748 | Protein of unknown function                                                   | msIMP, Unc-SP | Sec, YidC | 0031226, 0005887, 0009986 |
| Lmo0750 | Protein of unknown function                                                   | msIMP, Unc-SP | Sec, YidC | 0031226, 0005887, 0009986 |
| Lmo0757 | ABC-type transport system, multi-copper enzyme maturation, permease component | msIMP, Unc-SP | Sec, YidC | 0031226, 0005887, 0009986 |
| Lmo0766 | ABC-type sugar transport systems, permease components                         | msIMP, Unc-SP | Sec, YidC | 0031226, 0005887, 0009986 |
| Lmo0771 | Protein of unknown function                                                   | msIMP, Unc-SP | Sec, YidC | 0031226, 0005887, 0009986 |
| Lmo0782 | Phosphotransferase system, sorbose-specific IIC subunit                       | msIMP, Unc-SP | Sec, YidC | 0031226, 0005887, 0009986 |
| Lmo0787 | D-alanine/D-serine/glycine permease                                           | msIMP, Unc-SP | Sec, YidC | 0031226, 0005887, 0009986 |
| Lmo0795 | Chloramphenicol-sensitive protein, RarD                                       | msIMP, Unc-SP | Sec, YidC | 0031226, 0005887, 0009986 |
| Lmo0798 | lysine transporter                                                            | msIMP, Unc-SP | Sec, YidC | 0031226, 0005887, 0009986 |
| Lmo0804 | Protein of unknown function                                                   | msIMP, Unc-SP | Sec, YidC | 0031226, 0005887, 0009986 |
| Lmo0805 | Protein of unknown function                                                   | msIMP, Unc-SP | Sec, YidC | 0031226, 0005887, 0009986 |
| Lmo0808 | ABC-type spermidine/putrescine transport system, permease component I         | msIMP, Unc-SP | Sec, YidC | 0031226, 0005887, 0009986 |
| Lmo0809 | ABC-type spermidine/putrescine transport system, permease component II        | msIMP, Unc-SP | Sec, YidC | 0031226, 0005887, 0009986 |
| Lmo0818 | Cation transport ATPase                                                       | msIMP, Unc-SP | Sec, YidC | 0031226, 0005887, 0009986 |
| Lmo0836 | Phosphate-starvation-inducible E                                              | msIMP, Unc-SP | Sec, YidC | 0031226, 0005887, 0009986 |
| Lmo0838 | Sugar phosphate antiporter, UhpT                                              | msIMP, Unc-SP | Sec, YidC | 0031226, 0005887, 0009986 |
| Lmo0841 | Cation transport ATPase                                                       | msIMP, Unc-SP | Sec, YidC | 0031226, 0005887, 0009986 |
| Lmo0843 | Protein of unknown function with DUF1294 domain, COG3326                      | msIMP, Unc-SP | Sec, YidC | 0031226, 0005887, 0009986 |
| Lmo0853 | Small multidrug resistance protein                                            | msIMP, Unc-SP | Sec, YidC | 0031226, 0005887, 0009986 |
| Lmo0854 | Small multidrug resistance protein                                            | msIMP, Unc-SP | Sec, YidC | 0031226, 0005887, 0009986 |
| Lmo0861 | ABC-type sugar transport system, permease component                           | msIMP, Unc-SP | Sec, YidC | 0031226, 0005887, 0009986 |
| Lmo0876 | Phosphotransferase system cellobiose-specific component IIC                   | msIMP, Unc-SP | Sec, YidC | 0031226, 0005887, 0009986 |
| Lmo0882 | Protein of unknown function with DUF304 domain and , COG3402                  | msIMP, Unc-SP | Sec, YidC | 0031226, 0005887, 0009986 |
| Lmo0883 | Protein of unknown function , UCP026631-like, COG3428                         | msIMP, Unc-SP | Sec, YidC | 0031226, 0005887, 0009986 |

|         |                                                                               |               |           |                           |
|---------|-------------------------------------------------------------------------------|---------------|-----------|---------------------------|
| Lmo0901 | Phosphotransferase system, cellobiose-specific IIC component                  | msIMP, Unc-SP | Sec, YidC | 0031226, 0005887, 0009986 |
| Lmo0908 | Autoinducer-2 Exporter family, AI-2E (PerM)                                   | msIMP, Unc-SP | Sec, YidC | 0031226, 0005887, 0009986 |
| Lmo0912 | Formate/nitrite transporter                                                   | msIMP, Unc-SP | Sec, YidC | 0031226, 0005887, 0009986 |
| Lmo0915 | Phosphotransferase system cellobiose-specific component IIC                   | msIMP, Unc-SP | Sec, YidC | 0031226, 0005887, 0009986 |
| Lmo0920 | Protein of unknown function with DUF318 domain and , COG0701                  | msIMP, Unc-SP | Sec, YidC | 0031226, 0005887, 0009986 |
| Lmo0925 | ABC-type multidrug transport system, permease component                       | msIMP, Unc-SP | Sec, YidC | 0031226, 0005887, 0009986 |
| Lmo0927 | Membrane-bound phosphoglycerol transferase, alkaline phosphatase superfamily  | msIMP, Unc-SP | Sec, YidC | 0031226, 0005887, 0009986 |
| Lmo0932 | Selenite transport protein, SNARE-associated protein, YdjX                    | msIMP, Unc-SP | Sec, YidC | 0031226, 0005887, 0009986 |
| Lmo0937 | Protein of unknown function                                                   | msIMP, Unc-SP | Sec, YidC | 0031226, 0005887, 0009986 |
| Lmo0947 | Cyanate permease                                                              | msIMP, Unc-SP | Sec, YidC | 0031226, 0005887, 0009986 |
| Lmo0949 | Protein of unknown function, UPF0118-like, COG0628                            | msIMP, Unc-SP | Sec, YidC | 0031226, 0005887, 0009986 |
| Lmo0952 | Protein of unknown function                                                   | msIMP, Unc-SP | Sec, YidC | 0031226, 0005887, 0009986 |
| Lmo0954 | Protein of unknown function                                                   | msIMP, Unc-SP | Sec, YidC | 0031226, 0005887, 0009986 |
| Lmo0963 | Heat shock protein HtpX                                                       | msIMP, Unc-SP | Sec, YidC | 0031226, 0005887, 0009986 |
| Lmo0980 | ABC-type polysaccharide/polyol phosphate export system, permease component    | msIMP, Unc-SP | Sec, YidC | 0031226, 0005887, 0009986 |
| Lmo0985 | MFS general substrate transporter                                             | msIMP, Unc-SP | Sec, YidC | 0031226, 0005887, 0009986 |
| Lmo0987 | Multidrug/hemolysin exporter, CylA/B                                          | msIMP, Unc-SP | Sec, YidC | 0031226, 0005887, 0009986 |
| Lmo0990 | Na <sup>+</sup> -driven multidrug efflux pump                                 | msIMP, Unc-SP | Sec, YidC | 0031226, 0005887, 0009986 |
| Lmo0994 | Protein of unknown function                                                   | msIMP, Unc-SP | Sec, YidC | 0031226, 0005887, 0009986 |
| Lmo0995 | Fucose 4-O-acetylase and related acetyltransferases                           | msIMP, Unc-SP | Sec, YidC | 0031226, 0005887, 0009986 |
| Lmo0998 | Abortive infection protein                                                    | msIMP, Unc-SP | Sec, YidC | 0031226, 0005887, 0009986 |
| Lmo0999 | Protein of unknown function                                                   | msIMP, Unc-SP | Sec, YidC | 0031226, 0005887, 0009986 |
| Lmo1020 | Cell wall-active antibiotics response protein                                 | msIMP, Unc-SP | Sec, YidC | 0031226, 0005887, 0009986 |
| Lmo1024 | Protein of unknown function                                                   | msIMP, Unc-SP | Sec, YidC | 0031226, 0005887, 0009986 |
| Lmo1025 | Protein of unknown function, COG1289                                          | msIMP, Unc-SP | Sec, YidC | 0031226, 0005887, 0009986 |
| Lmo1037 | Protein of unknown function with DUF817 domain, COG3739                       | msIMP, Unc-SP | Sec, YidC | 0031226, 0005887, 0009986 |
| Lmo1056 | Protein of unknown function                                                   | msIMP, Unc-SP | Sec, YidC | 0031226, 0005887, 0009986 |
| Lmo1061 | Signal transduction histidine kinase, BaeS                                    | msIMP, Unc-SP | Sec, YidC | 0031226, 0005887, 0009986 |
| Lmo1062 | ABC-type transport system involved in lipoprotein release, permease component | msIMP, Unc-SP | Sec, YidC | 0031226, 0005887, 0009986 |
| Lmo1071 | Cell cycle protein                                                            | msIMP, Unc-SP | Sec, YidC | 0031226, 0005887, 0009986 |
| Lmo1074 | ABC-type polysaccharide/polyol, permease component, COG1682                   | msIMP, Unc-SP | Sec, YidC | 0031226, 0005887, 0009986 |
| Lmo1079 | Protein of unknown function, COG4485                                          | msIMP, Unc-SP | Sec, YidC | 0031226, 0005887, 0009986 |

|         |                                                                                   |               |           |                           |
|---------|-----------------------------------------------------------------------------------|---------------|-----------|---------------------------|
| Lmo1100 | Heavy metal translocating P-type ATPase, CadA                                     | msIMP, Unc-SP | Sec, YidC | 0031226, 0005887, 0009986 |
| Lmo1101 | Signal peptidase of Type II, LspB                                                 | msIMP, Unc-SP | Sec, YidC | 0031226, 0005887, 0009986 |
| Lmo1105 | Protein of unknown function                                                       | msIMP, Unc-SP | Sec, YidC | 0031226, 0005887, 0009986 |
| Lmo1107 | Transfer Clostridial Plasmid Conjugative System, Tcp-Conj protein family          | msIMP, Unc-SP | Sec, YidC | 0031226, 0005887, 0009986 |
| Lmo1109 | Protein of unknown function                                                       | msIMP, Unc-SP | Sec, YidC | 0031226, 0005887, 0009986 |
| Lmo1112 | Cell divisionFtsK/SpoIIIE                                                         | msIMP, Unc-SP | Sec, YidC | 0031226, 0005887, 0009986 |
| Lmo1132 | ABC-type transport system cysteine/glutathione, ATP-binding component             | msIMP, Unc-SP | Sec, YidC | 0031226, 0005887, 0009986 |
| Lmo1148 | Cobalamin synthase                                                                | msIMP, Unc-SP | Sec, YidC | 0031226, 0005887, 0009986 |
| Lmo1186 | Ethanolamine utilisation protein, EutH                                            | msIMP, Unc-SP | Sec, YidC | 0031226, 0005887, 0009986 |
| Lmo1192 | Cobalamin biosynthesis protein                                                    | msIMP, Unc-SP | Sec, YidC | 0031226, 0005887, 0009986 |
| Lmo1206 | Cobalt ABC transporter CbiQ, permease subunit, CbiQ                               | msIMP, Unc-SP | Sec, YidC | 0031226, 0005887, 0009986 |
| Lmo1224 | ABC-type antimicrobial peptide transport system, permease component               | msIMP, Unc-SP | Sec, YidC | 0031226, 0005887, 0009986 |
| Lmo1250 | Major facilitator superfamily MFS-1                                               | msIMP, Unc-SP | Sec, YidC | 0031226, 0005887, 0009986 |
| Lmo1291 | Acyltransferase family 3                                                          | msIMP, Unc-SP | Sec, YidC | 0031226, 0005887, 0009986 |
| Lmo1352 | Protein of unknown function                                                       | msIMP, Unc-SP | Sec, YidC | 0031226, 0005887, 0009986 |
| Lmo1385 | Protein of unknown function with DUF161 domain and , COG1284                      | msIMP, Unc-SP | Sec, YidC | 0031226, 0005887, 0009986 |
| Lmo1386 | DNA segregation ATPase FtsK/SpoIIIE and related proteins                          | msIMP, Unc-SP | Sec, YidC | 0031226, 0005887, 0009986 |
| Lmo1390 | ABC-type uncharacterized transport system, permease component                     | msIMP, Unc-SP | Sec, YidC | 0031226, 0005887, 0009986 |
| Lmo1396 | CDP-diacylglycerol--glycerol-3-phosphate 3-phosphatidyltransferase                | msIMP, Unc-SP | Sec, YidC | 0031226, 0005887, 0009986 |
| Lmo1409 | MFS general substrate transporter                                                 | msIMP, Unc-SP | Sec, YidC | 0031226, 0005887, 0009986 |
| Lmo1410 | Protein of unknown function                                                       | msIMP, Unc-SP | Sec, YidC | 0031226, 0005887, 0009986 |
| Lmo1417 | Permease of the major facilitator superfamily                                     | msIMP, Unc-SP | Sec, YidC | 0031226, 0005887, 0009986 |
| Lmo1419 | Autoinducer-2 exporter family, AI-2E (PerM)                                       | msIMP, Unc-SP | Sec, YidC | 0031226, 0005887, 0009986 |
| Lmo1424 | Mn <sup>2+</sup> and Fe <sup>2+</sup> transporters of the NRAMP family, MntH-like | msIMP, Unc-SP | Sec, YidC | 0031226, 0005887, 0009986 |
| Lmo1429 | Thiamine transporter YuaJ                                                         | msIMP, Unc-SP | Sec, YidC | 0031226, 0005887, 0009986 |
| Lmo1432 | Cytochrome c oxidase, subunit I                                                   | msIMP, Unc-SP | Sec, YidC | 0031226, 0005887, 0009986 |
| Lmo1440 | Protein of unknown function with DUF1189 domain                                   | msIMP, Unc-SP | Sec, YidC | 0031226, 0005887, 0009986 |
| Lmo1442 | AziC-like                                                                         | msIMP, Unc-SP | Sec, YidC | 0031226, 0005887, 0009986 |
| Lmo1464 | Diacylglycerol kinase                                                             | msIMP, Unc-SP | Sec, YidC | 0031226, 0005887, 0009986 |
| Lmo1466 | Membrane-associated HD superfamily hydrolase                                      | msIMP, Unc-SP | Sec, YidC | 0031226, 0005887, 0009986 |
| Lmo1506 | Macrolide exporter family, MacB                                                   | msIMP, Unc-SP | Sec, YidC | 0031226, 0005887, 0009986 |
| Lmo1508 | Signal transduction histidine kinase                                              | msIMP, Unc-SP | Sec, YidC | 0031226, 0005887, 0009986 |

|         |                                                                                                       |               |           |                           |
|---------|-------------------------------------------------------------------------------------------------------|---------------|-----------|---------------------------|
| Lmo1526 | Protein of unknown function, COG5416                                                                  | msIMP, Unc-SP | Sec, YidC | 0031226, 0005887, 0009986 |
| Lmo1546 | Cell shape-determining protein, MreD                                                                  | msIMP, Unc-SP | Sec, YidC | 0031226, 0005887, 0009986 |
| Lmo1550 | Type 4 prepilin peptidase, ComC                                                                       | msIMP, Unc-SP | Sec, YidC | 0031226, 0005887, 0009986 |
| Lmo1569 | Protein affecting phage T7 exclusion by the F plasmid, FxsA                                           | msIMP, Unc-SP | Sec, YidC | 0031226, 0005887, 0009986 |
| Lmo1584 | Protein with RDD domain                                                                               | msIMP, Unc-SP | Sec, YidC | 0031226, 0005887, 0009986 |
| Lmo1617 | Drug resistance transporter EmrB/QacA subfamily                                                       | msIMP, Unc-SP | Sec, YidC | 0031226, 0005887, 0009986 |
| Lmo1624 | Polysaccharide biosynthesis protein                                                                   | msIMP, Unc-SP | Sec, YidC | 0031226, 0005887, 0009986 |
| Lmo1625 | Polysaccharide biosynthesis protein                                                                   | msIMP, Unc-SP | Sec, YidC | 0031226, 0005887, 0009986 |
| Lmo1626 | Protein of unknown function                                                                           | msIMP, Unc-SP | Sec, YidC | 0031226, 0005887, 0009986 |
| Lmo1637 | ABC-type transport system, multi-copper enzyme maturation, permease component                         | msIMP, Unc-SP | Sec, YidC | 0031226, 0005887, 0009986 |
| Lmo1640 | Protein of unknown function                                                                           | msIMP, Unc-SP | Sec, YidC | 0031226, 0005887, 0009986 |
| Lmo1651 | ABC-type bacteriocin/lantibiotic exporters, ATP-binding/permease protein                              | msIMP, Unc-SP | Sec, YidC | 0031226, 0005887, 0009986 |
| Lmo1652 | ABC-type bacteriocin/lantibiotic exporters, ATP-binding/permease protein                              | msIMP, Unc-SP | Sec, YidC | 0031226, 0005887, 0009986 |
| Lmo1655 | VanZ like protein                                                                                     | msIMP, Unc-SP | Sec, YidC | 0031226, 0005887, 0009986 |
| Lmo1672 | O-succinylbenzoic acid--CoA ligase                                                                    | msIMP, Unc-SP | Sec, YidC | 0031226, 0005887, 0009986 |
| Lmo1677 | 1,4-dihydroxy-2-naphthoate octaprenyltransferase                                                      | msIMP, Unc-SP | Sec, YidC | 0031226, 0005887, 0009986 |
| Lmo1682 | MFS general substrate transporter                                                                     | msIMP, Unc-SP | Sec, YidC | 0031226, 0005887, 0009986 |
| Lmo1695 | Lysyl-tRNA synthetase                                                                                 | msIMP, Unc-SP | Sec, YidC | 0031226, 0005887, 0009986 |
| Lmo1697 | Co/Zn/Cd cation transporter                                                                           | msIMP, Unc-SP | Sec, YidC | 0031226, 0005887, 0009986 |
| Lmo1706 | Ribonuclease BN-related                                                                               | msIMP, Unc-SP | Sec, YidC | 0031226, 0005887, 0009986 |
| Lmo1712 | MFS general substrate transporter                                                                     | msIMP, Unc-SP | Sec, YidC | 0031226, 0005887, 0009986 |
| Lmo1723 | Protein of unknown function                                                                           | msIMP, Unc-SP | Sec, YidC | 0031226, 0005887, 0009986 |
| Lmo1732 | ABC-type sugar transport system, permease component                                                   | msIMP, Unc-SP | Sec, YidC | 0031226, 0005887, 0009986 |
| Lmo1741 | Signal transduction histidine kinase                                                                  | msIMP, Unc-SP | Sec, YidC | 0031226, 0005887, 0009986 |
| Lmo1746 | ABC-type transport system, involved in lipoprotein release, permease component                        | msIMP, Unc-SP | Sec, YidC | 0031226, 0005887, 0009986 |
| Lmo1748 | Protein of unknown function                                                                           | msIMP, Unc-SP | Sec, YidC | 0031226, 0005887, 0009986 |
| Lmo1761 | Na <sup>+</sup> -dependent transporters of the SNF family                                             | msIMP, Unc-SP | Sec, YidC | 0031226, 0005887, 0009986 |
| Lmo1762 | Protein of unknown function                                                                           | msIMP, Unc-SP | Sec, YidC | 0031226, 0005887, 0009986 |
| Lmo1839 | Xanthine/uracil permease, PyrP                                                                        | msIMP, Unc-SP | Sec, YidC | 0031226, 0005887, 0009986 |
| Lmo1845 | Hypoxanthine/guanosine uptake transporter, PbuG                                                       | msIMP, Unc-SP | Sec, YidC | 0031226, 0005887, 0009986 |
| Lmo1846 | Multidrug efflux protein                                                                              | msIMP, Unc-SP | Sec, YidC | 0031226, 0005887, 0009986 |
| Lmo1848 | ABC-type iron (Fe <sup>2+</sup> )/zinc (Zn <sup>2+</sup> )/copper (Cu <sup>2+</sup> ) transprt system | msIMP, Unc-SP | Sec, YidC | 0031226, 0005887, 0009986 |

|         |                                                                               |               |           |                           |
|---------|-------------------------------------------------------------------------------|---------------|-----------|---------------------------|
| Lmo1864 | HylIII                                                                        | msIMP, Unc-SP | Sec, YidC | 0031226, 0005887, 0009986 |
| Lmo1869 | Aromatic acid exporter family, ArAE                                           | msIMP, Unc-SP | Sec, YidC | 0031226, 0005887, 0009986 |
| Lmo1870 | Selenite transport protein, SNARE-associated protein                          | msIMP, Unc-SP | Sec, YidC | 0031226, 0005887, 0009986 |
| Lmo1884 | Xanthine permease                                                             | msIMP, Unc-SP | Sec, YidC | 0031226, 0005887, 0009986 |
| Lmo1909 | Protein of unknown function with DUF161 domain, COG1284                       | msIMP, Unc-SP | Sec, YidC | 0031226, 0005887, 0009986 |
| Lmo1920 | Protein of unknown function with DUF1405 domain, COG4347                      | msIMP, Unc-SP | Sec, YidC | 0031226, 0005887, 0009986 |
| Lmo1947 | Signal transduction histidine kinase, ResE                                    | msIMP, Unc-SP | Sec, YidC | 0031226, 0005887, 0009986 |
| Lmo1957 | ABC Fe <sup>3+</sup> -siderophore transport system, permease component, FhuG  | msIMP, Unc-SP | Sec, YidC | 0031226, 0005887, 0009986 |
| Lmo1963 | ABC-type transport system, multi-copper enzyme maturation, permease component | msIMP, Unc-SP | Sec, YidC | 0031226, 0005887, 0009986 |
| Lmo1966 | 5-bromo-4-chloroindolyl phosphate hydrolysis protein                          | msIMP, Unc-SP | Sec, YidC | 0031226, 0005887, 0009986 |
| Lmo1980 | Protein of unknown function                                                   | msIMP, Unc-SP | Sec, YidC | 0031226, 0005887, 0009986 |
| Lmo2008 | ABC-type sugar transport system, permease component                           | msIMP, Unc-SP | Sec, YidC | 0031226, 0005887, 0009986 |
| Lmo2011 | Signal transduction protein with a C-terminal ATPase domain                   | msIMP, Unc-SP | Sec, YidC | 0031226, 0005887, 0009986 |
| Lmo2012 | Protein of unknown function with DUF624 domain and , COG5578                  | msIMP, Unc-SP | Sec, YidC | 0031226, 0005887, 0009986 |
| Lmo2043 | MFS general substrate transporter                                             | msIMP, Unc-SP | Sec, YidC | 0031226, 0005887, 0009986 |
| Lmo2045 | Protein of unknown function , UCP030092-like                                  | msIMP, Unc-SP | Sec, YidC | 0031226, 0005887, 0009986 |
| Lmo2057 | Protohaem IX farnesyltransferase, CtaB                                        | msIMP, Unc-SP | Sec, YidC | 0031226, 0005887, 0009986 |
| Lmo2059 | Voltage-gated potassium channel                                               | msIMP, Unc-SP | Sec, YidC | 0031226, 0005887, 0009986 |
| Lmo2063 | Protein of unknown function                                                   | msIMP, Unc-SP | Sec, YidC | 0031226, 0005887, 0009986 |
| Lmo2064 | Large-conductance mechanosensitive channel, MscL                              | msIMP, Unc-SP | Sec, YidC | 0031226, 0005887, 0009986 |
| Lmo2065 | Protein of unknown function                                                   | msIMP, Unc-SP | Sec, YidC | 0031226, 0005887, 0009986 |
| Lmo2066 | Protein of unknown function                                                   | msIMP, Unc-SP | Sec, YidC | 0031226, 0005887, 0009986 |
| Lmo2071 | Protein of unknown function                                                   | msIMP, Unc-SP | Sec, YidC | 0031226, 0005887, 0009986 |
| Lmo2082 | Camphor resistance CrcB protein                                               | msIMP, Unc-SP | Sec, YidC | 0031226, 0005887, 0009986 |
| Lmo2087 | Multidrug efflux pump, VmrA                                                   | msIMP, Unc-SP | Sec, YidC | 0031226, 0005887, 0009986 |
| Lmo2115 | Bacitracin exporter, BceAB (BarAB, YtsCD)                                     | msIMP, Unc-SP | Sec, YidC | 0031226, 0005887, 0009986 |
| Lmo2116 | Protein of unknown function                                                   | msIMP, Unc-SP | Sec, YidC | 0031226, 0005887, 0009986 |
| Lmo2123 | ABC-type maltose transport systems, permease component                        | msIMP, Unc-SP | Sec, YidC | 0031226, 0005887, 0009986 |
| Lmo2124 | ABC-type sugar transport systems, permease components                         | msIMP, Unc-SP | Sec, YidC | 0031226, 0005887, 0009986 |
| Lmo2127 | Abortive infection protein                                                    | msIMP, Unc-SP | Sec, YidC | 0031226, 0005887, 0009986 |
| Lmo2129 | Protein of unknown function                                                   | msIMP, Unc-SP | Sec, YidC | 0031226, 0005887, 0009986 |
| Lmo2130 | Amino acid transporters                                                       | msIMP, Unc-SP | Sec, YidC | 0031226, 0005887, 0009986 |



|         |                                                                                          |               |           |                           |
|---------|------------------------------------------------------------------------------------------|---------------|-----------|---------------------------|
| Lmo2145 | Niacin/nicotinamide transporter, NiaY                                                    | msIMP, Unc-SP | Sec, YidC | 0031226, 0005887, 0009986 |
| Lmo2147 | Sulfate exporter family, efflux pump, YeiH                                               | msIMP, Unc-SP | Sec, YidC | 0031226, 0005887, 0009986 |
| Lmo2148 | Protein of unknown function with DUF1361 domain and , COG4330                            | msIMP, Unc-SP | Sec, YidC | 0031226, 0005887, 0009986 |
| Lmo2150 | Protein of unknown function                                                              | msIMP, Unc-SP | Sec, YidC | 0031226, 0005887, 0009986 |
| Lmo2169 | Protein of unknown function                                                              | msIMP, Unc-SP | Sec, YidC | 0031226, 0005887, 0009986 |
| Lmo2177 | Protein of unknown function                                                              | msIMP, Unc-SP | Sec, YidC | 0031226, 0005887, 0009986 |
| Lmo2194 | ABC-type dipeptide/oligopeptide/nickel transport system, permease component              | msIMP, Unc-SP | Sec, YidC | 0031226, 0005887, 0009986 |
| Lmo2195 | ABC-type dipeptide/oligopeptide/nickel transport system, permease component              | msIMP, Unc-SP | Sec, YidC | 0031226, 0005887, 0009986 |
| Lmo2197 | Protein of unknown function                                                              | msIMP, Unc-SP | Sec, YidC | 0031226, 0005887, 0009986 |
| Lmo2204 | Protein of unknown function                                                              | msIMP, Unc-SP | Sec, YidC | 0031226, 0005887, 0009986 |
| Lmo2207 | Protein interacting with FtsH                                                            | msIMP, Unc-SP | Sec, YidC | 0031226, 0005887, 0009986 |
| Lmo2214 | ABC-type transporter, EcsB                                                               | msIMP, Unc-SP | Sec, YidC | 0031226, 0005887, 0009986 |
| Lmo2218 | Protein of unknown function                                                              | msIMP, Unc-SP | Sec, YidC | 0031226, 0005887, 0009986 |
| Lmo2226 | Protein of unknown function                                                              | msIMP, Unc-SP | Sec, YidC | 0031226, 0005887, 0009986 |
| Lmo2228 | Protein of unknown function                                                              | msIMP, Unc-SP | Sec, YidC | 0031226, 0005887, 0009986 |
| Lmo2231 | Cation efflux protein                                                                    | msIMP, Unc-SP | Sec, YidC | 0031226, 0005887, 0009986 |
| Lmo2232 | Hemolysin, CBS domains                                                                   | msIMP, Unc-SP | Sec, YidC | 0031226, 0005887, 0009986 |
| Lmo2237 | MFS general substrate transporter                                                        | msIMP, Unc-SP | Sec, YidC | 0031226, 0005887, 0009986 |
| Lmo2238 | MFS general substrate transporter                                                        | msIMP, Unc-SP | Sec, YidC | 0031226, 0005887, 0009986 |
| Lmo2239 | Protein of unknown function                                                              | msIMP, Unc-SP | Sec, YidC | 0031226, 0005887, 0009986 |
| Lmo2254 | Xanthine/uracil/vitamin C permease                                                       | msIMP, Unc-SP | Sec, YidC | 0031226, 0005887, 0009986 |
| Lmo2265 | Protein of unknown function with DUF1516 domain                                          | msIMP, Unc-SP | Sec, YidC | 0031226, 0005887, 0009986 |
| Lmo2330 | Protein of unknown function                                                              | msIMP, Unc-SP | Sec, YidC | 0031226, 0005887, 0009986 |
| Lmo2348 | ABC-type amino acid transport system, permease component                                 | msIMP, Unc-SP | Sec, YidC | 0031226, 0005887, 0009986 |
| Lmo2353 | NhaP-type Na <sup>+</sup> /H <sup>+</sup> and K <sup>+</sup> /H <sup>+</sup> antiporters | msIMP, Unc-SP | Sec, YidC | 0031226, 0005887, 0009986 |
| Lmo2355 | MFS general substrate transporter                                                        | msIMP, Unc-SP | Sec, YidC | 0031226, 0005887, 0009986 |
| Lmo2357 | Acid-resistance membrane protein, COG3247                                                | msIMP, Unc-SP | Sec, YidC | 0031226, 0005887, 0009986 |
| Lmo2371 | ABC-type transport system, involved in lipoprotein release, permease component           | msIMP, Unc-SP | Sec, YidC | 0031226, 0005887, 0009986 |
| Lmo2377 | MFS general substrate transporter                                                        | msIMP, Unc-SP | Sec, YidC | 0031226, 0005887, 0009986 |
| Lmo2382 | Monovalent cation/H <sup>+</sup> antiporter subunit E                                    | msIMP, Unc-SP | Sec, YidC | 0031226, 0005887, 0009986 |
| Lmo2384 | Monovalent cation/H <sup>+</sup> antiporter subunitGF                                    | msIMP, Unc-SP | Sec, YidC | 0031226, 0005887, 0009986 |
| Lmo2387 | Chloride channel, core                                                                   | msIMP, Unc-SP | Sec, YidC | 0031226, 0005887, 0009986 |

|         |                                                                              |               |           |                           |
|---------|------------------------------------------------------------------------------|---------------|-----------|---------------------------|
| Lmo2399 | Hemolysins and related proteins containing CBS domains                       | msIMP, Unc-SP | Sec, YidC | 0031226, 0005887, 0009986 |
| Lmo2404 | 4-toluene sulfonate uptake permease family                                   | msIMP, Unc-SP | Sec, YidC | 0031226, 0005887, 0009986 |
| Lmo2405 | Protein of unknown function with DUF1634 domain and , COG4272                | msIMP, Unc-SP | Sec, YidC | 0031226, 0005887, 0009986 |
| Lmo2409 | Protein of unknown function                                                  | msIMP, Unc-SP | Sec, YidC | 0031226, 0005887, 0009986 |
| Lmo2418 | ABC-type metal ion transport system, permease component                      | msIMP, Unc-SP | Sec, YidC | 0031226, 0005887, 0009986 |
| Lmo2421 | Signal transduction histidine kinase                                         | msIMP, Unc-SP | Sec, YidC | 0031226, 0005887, 0009986 |
| Lmo2423 | Cation efflux protein                                                        | msIMP, Unc-SP | Sec, YidC | 0031226, 0005887, 0009986 |
| Lmo2427 | Rod shape-determining protein RodA                                           | msIMP, Unc-SP | Sec, YidC | 0031226, 0005887, 0009986 |
| Lmo2428 | Rod shape-determining protein RodA                                           | msIMP, Unc-SP | Sec, YidC | 0031226, 0005887, 0009986 |
| Lmo2430 | Transport system permease protein                                            | msIMP, Unc-SP | Sec, YidC | 0031226, 0005887, 0009986 |
| Lmo2435 | Protein of unknown function, COG5658                                         | msIMP, Unc-SP | Sec, YidC | 0031226, 0005887, 0009986 |
| Lmo2463 | Drug exporters of the RND superfamily                                        | msIMP, Unc-SP | Sec, YidC | 0031226, 0005887, 0009986 |
| Lmo2466 | Protein of unknown function , COG4269                                        | msIMP, Unc-SP | Sec, YidC | 0031226, 0005887, 0009986 |
| Lmo2469 | Amino acid/polyamine transporter I                                           | msIMP, Unc-SP | Sec, YidC | 0031226, 0005887, 0009986 |
| Lmo2484 | Protein of unknown function , COG1950                                        | msIMP, Unc-SP | Sec, YidC | 0031226, 0005887, 0009986 |
| Lmo2492 | Protein of unknown function                                                  | msIMP, Unc-SP | Sec, YidC | 0031226, 0005887, 0009986 |
| Lmo2497 | Phosphate transport system permease protein 2                                | msIMP, Unc-SP | Sec, YidC | 0031226, 0005887, 0009986 |
| Lmo2498 | Phosphate ABC transporter, permease protein PstC                             | msIMP, Unc-SP | Sec, YidC | 0031226, 0005887, 0009986 |
| Lmo2500 | Signal transduction histidine kinase, PhoR                                   | msIMP, Unc-SP | Sec, YidC | 0031226, 0005887, 0009986 |
| Lmo2503 | Cardiolipin synthetase                                                       | msIMP, Unc-SP | Sec, YidC | 0031226, 0005887, 0009986 |
| Lmo2506 | Cell division protein, FtsX                                                  | msIMP, Unc-SP | Sec, YidC | 0031226, 0005887, 0009986 |
| Lmo2508 | Protein of unknown function with DUF161 domain and , COG1284                 | msIMP, Unc-SP | Sec, YidC | 0031226, 0005887, 0009986 |
| Lmo2527 | Protein of unknown function with unceaved signal peptide, YwzB-like, COG4836 | msIMP, Unc-SP | Sec, YidC | 0031226, 0005887, 0009986 |
| Lmo2535 | F0F1 ATP synthase, subunit A                                                 | msIMP, Unc-SP | Sec, YidC | 0031226, 0005887, 0009986 |
| Lmo2536 | F0F1 ATP synthase, subunit I                                                 | msIMP, Unc-SP | Sec, YidC | 0031226, 0005887, 0009986 |
| Lmo2549 | Wall teichoic acid glycosylation protein, GtcA                               | msIMP, Unc-SP | Sec, YidC | 0031226, 0005887, 0009986 |
| Lmo2553 | Protein of unknown function , CHP00374-like, COG0392                         | msIMP, Unc-SP | Sec, YidC | 0031226, 0005887, 0009986 |
| Lmo2563 | Peptidase M50                                                                | msIMP, Unc-SP | Sec, YidC | 0031226, 0005887, 0009986 |
| Lmo2567 | Protein of unknown function                                                  | msIMP, Unc-SP | Sec, YidC | 0031226, 0005887, 0009986 |
| Lmo2570 | Peptide-antibiotic killer factor immunity protein, SdpI family, SdpC (YvaZ)  | msIMP, Unc-SP | Sec, YidC | 0031226, 0005887, 0009986 |
| Lmo2575 | Cation efflux protein                                                        | msIMP, Unc-SP | Sec, YidC | 0031226, 0005887, 0009986 |
| Lmo2581 | ABC-type antimicrobial peptide transport system, permease component          | msIMP, Unc-SP | Sec, YidC | 0031226, 0005887, 0009986 |

|         |                                                                               |               |                    |                           |
|---------|-------------------------------------------------------------------------------|---------------|--------------------|---------------------------|
| Lmo2582 | Signal transduction histidine kinase                                          | msIMP, Unc-SP | Sec, YidC          | 0031226, 0005887, 0009986 |
| Lmo2588 | Drug resistance transporter EmrB/QacA subfamily                               | msIMP, Unc-SP | Sec, YidC          | 0031226, 0005887, 0009986 |
| Lmo2599 | Cobalt transport protein                                                      | msIMP, Unc-SP | Sec, YidC          | 0031226, 0005887, 0009986 |
| Lmo2634 | Cobalt transport protein                                                      | msIMP, Unc-SP | Sec, YidC          | 0031226, 0005887, 0009986 |
| Lmo2635 | 1,4-dihydroxy-2-naphthoate octaprenyltransferase                              | msIMP, Unc-SP | Sec, YidC          | 0031226, 0005887, 0009986 |
| Lmo2681 | K <sup>+</sup> transporting ATPase, B subunit, KdpB                           | msIMP, Unc-SP | Sec, YidC          | 0031226, 0005887, 0009986 |
| Lmo2684 | Phosphotransferase system, lactose/cellobiose IIC component                   | msIMP, Unc-SP | Sec, YidC          | 0031226, 0005887, 0009986 |
| Lmo2689 | Cation transport ATPase                                                       | msIMP, Unc-SP | Sec, YidC          | 0031226, 0005887, 0009986 |
| Lmo2708 | Phosphotransferase system, lactose/cellobiose IIC component                   | msIMP, Unc-SP | Sec, YidC          | 0031226, 0005887, 0009986 |
| Lmo2715 | ABC transporter, cysteine exporter family, permease/ATP-binding protein, CydD | msIMP, Unc-SP | Sec, YidC          | 0031226, 0005887, 0009986 |
| Lmo2716 | ABC transporter, cysteine exporter family, permease/ATP-binding protein, CydC | msIMP, Unc-SP | Sec, YidC          | 0031226, 0005887, 0009986 |
| Lmo2725 | Na <sup>+</sup> -driven multidrug efflux pump                                 | msIMP, Unc-SP | Sec, YidC          | 0031226, 0005887, 0009986 |
| Lmo2738 | Hemolysins and related proteins containing CBS domains                        | msIMP, Unc-SP | Sec, YidC          | 0031226, 0005887, 0009986 |
| Lmo2741 | Drug efflux system protein, MdtG                                              | msIMP, Unc-SP | Sec, YidC          | 0031226, 0005887, 0009986 |
| Lmo2751 | ABC-type bacteriocin/lantibiotic exporters, ATP-binding/permease protein      | msIMP, Unc-SP | Sec, YidC          | 0031226, 0005887, 0009986 |
| Lmo2752 | ABC-type bacteriocin/lantibiotic exporters, ATP-binding/permease protein      | msIMP, Unc-SP | Sec, YidC          | 0031226, 0005887, 0009986 |
| Lmo2763 | Phosphotransferase system cellobiose-specific component IIC                   | msIMP, Unc-SP | Sec, YidC          | 0031226, 0005887, 0009986 |
| Lmo2768 | Protein of unknown function                                                   | msIMP, Unc-SP | Sec, YidC          | 0031226, 0005887, 0009986 |
| Lmo2775 | Bacteriocin-associated integral membrane protein                              | msIMP, Unc-SP | Sec, YidC          | 0031226, 0005887, 0009986 |
| Lmo2777 | MFS general substrate transporter                                             | msIMP, Unc-SP | Sec, YidC          | 0031226, 0005887, 0009986 |
| Lmo2783 | Phosphotransferase system cellobiose-specific component IIC                   | msIMP, Unc-SP | Sec, YidC          | 0031226, 0005887, 0009986 |
| Lmo2799 | Phosphotransferase system, mannitol-specific IIBC component                   | msIMP, Unc-SP | Sec, YidC          | 0031226, 0005887, 0009986 |
| Lmo2816 | MFS general substrate transporter                                             | msIMP, Unc-SP | Sec, YidC          | 0031226, 0005887, 0009986 |
| Lmo2818 | MFS general substrate transporter                                             | msIMP, Unc-SP | Sec, YidC          | 0031226, 0005887, 0009986 |
| Lmo2826 | MFS general substrate transporter                                             | msIMP, Unc-SP | Sec, YidC          | 0031226, 0005887, 0009986 |
| Lmo2837 | ABC-type sugar transport system, permease component                           | msIMP, Unc-SP | Sec, YidC          | 0031226, 0005887, 0009986 |
| Lmo2838 | ABC-type sugar transport systems, permease components                         | msIMP, Unc-SP | Sec, YidC          | 0031226, 0005887, 0009986 |
| Lmo2850 | MFS general substrate transporter                                             | msIMP, Unc-SP | Sec, YidC          | 0031226, 0005887, 0009986 |
| Lmo0029 | Protein of unknown function                                                   | msIMP, SP     | Sec, YidC, SPase I | 0031226, 0005887, 0009986 |
| Lmo0037 | Amino acid/polyamine transporter I                                            | msIMP, SP     | Sec, YidC, SPase I | 0031226, 0005887, 0009986 |
| Lmo0057 | WXG100 protein secretion system, membrane component, EsaA                     | msIMP, SP     | Sec, YidC, SPase I | 0031226, 0005887, 0009986 |
| Lmo0136 | ABC-type dipeptide/oligopeptide/nickel transport system, permease component   | msIMP, SP     | Sec, YidC, SPase I | 0031226, 0005887, 0009986 |

|         |                                                                                    |           |                    |                           |
|---------|------------------------------------------------------------------------------------|-----------|--------------------|---------------------------|
| Lmo0169 | Sugar uptake permease                                                              | msIMP, SP | Sec, YidC, SPase I | 0031226, 0005887, 0009986 |
| Lmo0179 | ABC-type sugar transport system, permease component                                | msIMP, SP | Sec, YidC, SPase I | 0031226, 0005887, 0009986 |
| Lmo0234 | Protein with PIN domain superfamily, COG4956                                       | msIMP, SP | Sec, YidC, SPase I | 0031226, 0005887, 0009986 |
| Lmo0365 | High-affinity Fe <sup>2+</sup> /Pb <sup>2+</sup> permease                          | msIMP, SP | Sec, YidC, SPase I | 0031226, 0005887, 0009986 |
| Lmo0404 | Protein of unknown function                                                        | msIMP, SP | Sec, YidC, SPase I | 0031226, 0005887, 0009986 |
| Lmo0414 | Divalent heavy-metal cations transporter                                           | msIMP, SP | Sec, YidC, SPase I | 0031226, 0005887, 0009986 |
| Lmo0444 | Phage infection protein, YhgE, C-terminal                                          | msIMP, SP | Sec, YidC, SPase I | 0031226, 0005887, 0009986 |
| Lmo0448 | Amino acid/polyamine transporter I                                                 | msIMP, SP | Sec, YidC, SPase I | 0031226, 0005887, 0009986 |
| Lmo0449 | Protein of unknown function                                                        | msIMP, SP | Sec, YidC, SPase I | 0031226, 0005887, 0009986 |
| Lmo0576 | Protein of unknown function with DUF1085 domain                                    | msIMP, SP | Sec, YidC, SPase I | 0031226, 0005887, 0009986 |
| Lmo0591 | Protein of unknown function with DUF1295 domain, COG3752                           | msIMP, SP | Sec, YidC, SPase I | 0031226, 0005887, 0009986 |
| Lmo0626 | Protein of unknown function                                                        | msIMP, SP | Sec, YidC, SPase I | 0031226, 0005887, 0009986 |
| Lmo0632 | Phosphotransferase system, fructose-specific IIC component                         | msIMP, SP | Sec, YidC, SPase I | 0031226, 0005887, 0009986 |
| Lmo0650 | Phage infection protein, YhgE                                                      | msIMP, SP | Sec, YidC, SPase I | 0031226, 0005887, 0009986 |
| Lmo0666 | Protein of unknown function with DUF423 domain, COG2363                            | msIMP, SP | Sec, YidC, SPase I | 0031226, 0005887, 0009986 |
| Lmo0676 | Flagellar export apparatus, membrane subunit FliP                                  | msIMP, SP | Sec, YidC, SPase I | 0031226, 0005887, 0009986 |
| Lmo0678 | Flagellar export apparatus, membrane subunit FliR                                  | msIMP, SP | Sec, YidC, SPase I | 0031226, 0005887, 0009986 |
| Lmo0767 | ABC-type sugar transport system, permease component                                | msIMP, SP | Sec, YidC, SPase I | 0031226, 0005887, 0009986 |
| Lmo0831 | Malonate transporter, MdcF                                                         | msIMP, SP | Sec, YidC, SPase I | 0031226, 0005887, 0009986 |
| Lmo0839 | MFS general substrate transporter                                                  | msIMP, SP | Sec, YidC, SPase I | 0031226, 0005887, 0009986 |
| Lmo0847 | ABC-type amino acid transport system, permease component                           | msIMP, SP | Sec, YidC, SPase I | 0031226, 0005887, 0009986 |
| Lmo0860 | ABC-type sugar transport systems, permease components                              | msIMP, SP | Sec, YidC, SPase I | 0031226, 0005887, 0009986 |
| Lmo0872 | Arabinose efflux permease                                                          | msIMP, SP | Sec, YidC, SPase I | 0031226, 0005887, 0009986 |
| Lmo0897 | Sulphate anion transporter                                                         | msIMP, SP | Sec, YidC, SPase I | 0031226, 0005887, 0009986 |
| Lmo0921 | Protein of unknown function with DUF1980 domain, COG3689                           | msIMP, SP | Sec, YidC, SPase I | 0031226, 0005887, 0009986 |
| Lmo0959 | Glycosyl transferase, family 4                                                     | msIMP, SP | Sec, YidC, SPase I | 0031226, 0005887, 0009986 |
| Lmo0973 | D-alanine esterification of lipoteichoic acid and wall teichoic acid protein, DltB | msIMP, SP | Sec, YidC, SPase I | 0031226, 0005887, 0009986 |
| Lmo0981 | MFS general substrate transporter                                                  | msIMP, SP | Sec, YidC, SPase I | 0031226, 0005887, 0009986 |
| Lmo0991 | Tellurium resistance membrane protein, TerC                                        | msIMP, SP | Sec, YidC, SPase I | 0031226, 0005887, 0009986 |
| Lmo1004 | Protein of unknown function with DUF218 domain, COG1434                            | msIMP, SP | Sec, YidC, SPase I | 0031226, 0005887, 0009986 |
| Lmo1040 | ABC-type molybdate transport system, permease component                            | msIMP, SP | Sec, YidC, SPase I | 0031226, 0005887, 0009986 |
| Lmo1131 | ABC-type transport system cysteine/glutathione, ATP-binding component              | msIMP, SP | Sec, YidC, SPase I | 0031226, 0005887, 0009986 |

|         |                                                                                |           |                    |                           |
|---------|--------------------------------------------------------------------------------|-----------|--------------------|---------------------------|
| Lmo1190 | Dimethylbenzimidazole porter, CblT                                             | msIMP, SP | Sec, YidC, SPase I | 0031226, 0005887, 0009986 |
| Lmo1204 | Cobalamin (vitamin B12) biosynthesis CbiM                                      | msIMP, SP | Sec, YidC, SPase I | 0031226, 0005887, 0009986 |
| Lmo1210 | Orotate transporter, OroP                                                      | msIMP, SP | Sec, YidC, SPase I | 0031226, 0005887, 0009986 |
| Lmo1211 | Orotate transporter, OroP                                                      | msIMP, SP | Sec, YidC, SPase I | 0031226, 0005887, 0009986 |
| Lmo1226 | Drug exporters of the RND superfamily                                          | msIMP, SP | Sec, YidC, SPase I | 0031226, 0005887, 0009986 |
| Lmo1252 | Protein of unknown function with DUF161 domain, COG1284                        | msIMP, SP | Sec, YidC, SPase I | 0031226, 0005887, 0009986 |
| Lmo1300 | Arsenical pump membrane protein                                                | msIMP, SP | Sec, YidC, SPase I | 0031226, 0005887, 0009986 |
| Lmo1316 | Phosphatidate cytidyltransferase, CdsA                                         | msIMP, SP | Sec, YidC, SPase I | 0031226, 0005887, 0009986 |
| Lmo1391 | Deoxyribonucleoside permease, RnsD                                             | msIMP, SP | Sec, YidC, SPase I | 0031226, 0005887, 0009986 |
| Lmo1416 | Glycopeptide antibiotics resistance protein                                    | msIMP, SP | Sec, YidC, SPase I | 0031226, 0005887, 0009986 |
| Lmo1527 | Sec transcolon, bifunctional subunit SecDF                                     | msIMP, SP | Sec, YidC, SPase I | 0031226, 0005887, 0009986 |
| Lmo1568 | Protein of unknown function with DUF441 domain, COG2707                        | msIMP, SP | Sec, YidC, SPase I | 0031226, 0005887, 0009986 |
| Lmo1623 | Phosphatidic acid phosphatase type 2/haloperoxidase                            | msIMP, SP | Sec, YidC, SPase I | 0031226, 0005887, 0009986 |
| Lmo1686 | Protein of unknown function with DUF939 domain, COG4129                        | msIMP, SP | Sec, YidC, SPase I | 0031226, 0005887, 0009986 |
| Lmo1690 | Protein of unknown function with DUF457 domain, COG1988                        | msIMP, SP | Sec, YidC, SPase I | 0031226, 0005887, 0009986 |
| Lmo1696 | Glycopeptide antibiotics resistance protein                                    | msIMP, SP | Sec, YidC, SPase I | 0031226, 0005887, 0009986 |
| Lmo1731 | ABC-type sugar transport systems, permease components                          | msIMP, SP | Sec, YidC, SPase I | 0031226, 0005887, 0009986 |
| Lmo1945 | Riboflavin uptake transporter, YpaA                                            | msIMP, SP | Sec, YidC, SPase I | 0031226, 0005887, 0009986 |
| Lmo1958 | ABC Fe <sup>3+</sup> -siderophore transport system, permease component, FhuB   | msIMP, SP | Sec, YidC, SPase I | 0031226, 0005887, 0009986 |
| Lmo2001 | Phosphotransferase system, mannose/fructose/N-acetylgalactosamine-specific IIC | msIMP, SP | Sec, YidC, SPase I | 0031226, 0005887, 0009986 |
| Lmo2009 | ABC-type polysaccharide transport system, permease component                   | msIMP, SP | Sec, YidC, SPase I | 0031226, 0005887, 0009986 |
| Lmo2017 | Phosphatidic acid phosphatase type 2/haloperoxidase                            | msIMP, SP | Sec, YidC, SPase I | 0031226, 0005887, 0009986 |
| Lmo2058 | Cytochrome oxidase assembly protein, CtaA                                      | msIMP, SP | Sec, YidC, SPase I | 0031226, 0005887, 0009986 |
| Lmo2062 | Copper resistance D                                                            | msIMP, SP | Sec, YidC, SPase I | 0031226, 0005887, 0009986 |
| Lmo2070 | Abortive infection protein                                                     | msIMP, SP | Sec, YidC, SPase I | 0031226, 0005887, 0009986 |
| Lmo2092 | BCCT transporter                                                               | msIMP, SP | Sec, YidC, SPase I | 0031226, 0005887, 0009986 |
| Lmo2122 | Maltodextrose utilization protein MalA                                         | msIMP, SP | Sec, YidC, SPase I | 0031226, 0005887, 0009986 |
| Lmo2135 | Phosphotransferase system, fructose-specific IIC component                     | msIMP, SP | Sec, YidC, SPase I | 0031226, 0005887, 0009986 |
| Lmo2140 | ABC-type Na <sup>+</sup> efflux pump, permease component                       | msIMP, SP | Sec, YidC, SPase I | 0031226, 0005887, 0009986 |
| Lmo2171 | MFS general substrate transporter                                              | msIMP, SP | Sec, YidC, SPase I | 0031226, 0005887, 0009986 |
| Lmo2183 | Transport system permease protein                                              | msIMP, SP | Sec, YidC, SPase I | 0031226, 0005887, 0009986 |
| Lmo2249 | Phosphate transporter                                                          | msIMP, SP | Sec, YidC, SPase I | 0031226, 0005887, 0009986 |

|         |                                                                              |                   |                          |                                    |
|---------|------------------------------------------------------------------------------|-------------------|--------------------------|------------------------------------|
| Lmo2250 | ABC arginine/histidine transport system, permease component                  | msIMP, SP         | Sec, YidC, SPase I       | 0031226, 0005887, 0009986          |
| Lmo2255 | Protein of unknown function                                                  | msIMP, SP         | Sec, YidC, SPase I       | 0031226, 0005887, 0009986          |
| Lmo2264 | Protein of unknown function, GlnB-like, COG1284                              | msIMP, SP         | Sec, YidC, SPase I       | 0031226, 0005887, 0009986          |
| Lmo2279 | Holin phage A118                                                             | msIMP, SP         | Sec, YidC, SPase I       | 0031226, 0005887, 0009986          |
| Lmo2360 | Phage infection protein, YhgE                                                | msIMP, SP         | Sec, YidC, SPase I       | 0031226, 0005887, 0009986          |
| Lmo2362 | Glutamate:g-aminobutyrate antiporter                                         | msIMP, SP         | Sec, YidC, SPase I       | 0031226, 0005887, 0009986          |
| Lmo2379 | Multisubunit Na <sup>+</sup> /H <sup>+</sup> antiporter, MnhB subunit        | msIMP, SP         | Sec, YidC, SPase I       | 0031226, 0005887, 0009986          |
| Lmo2386 | Acid phosphatase/vanadium-dependent haloperoxidase                           | msIMP, SP         | Sec, YidC, SPase I       | 0031226, 0005887, 0009986          |
| Lmo2443 | Protein of unknown function                                                  | msIMP, SP         | Sec, YidC, SPase I       | 0031226, 0005887, 0009986          |
| Lmo2612 | Sec translocon, subunit SecY                                                 | msIMP, SP         | Sec, YidC, SPase I       | 0031226, 0005887, 0009986          |
| Lmo2640 | Heptaprenyl diphosphate synthase                                             | msIMP, SP         | Sec, YidC, SPase I       | 0031226, 0005887, 0009986          |
| Lmo2688 | Cell cycle protein                                                           | msIMP, SP         | Sec, YidC, SPase I       | 0031226, 0005887, 0009986          |
| Lmo2745 | ABC-type bacteriocin/lantibiotic exporters, ATP-binding/permease protein     | msIMP, SP         | Sec, YidC, SPase I       | 0031226, 0005887, 0009986          |
| Lmo2845 | MFS general substrate transporter                                            | msIMP, SP         | Sec, YidC, SPase I       | 0031226, 0005887, 0009986          |
| Lmo0013 | AA3-600 quinol oxidase subunit II, QoxA                                      | msIMP-Lipoprotein | Sec, YidC, Lgt, SPase II | 0031226, 0005887, 0046658, 0009986 |
| Lmo0269 | ABC-type dipeptide/oligopeptide/nickel transport systems, permease component | msIMP-Lipoprotein | Sec, YidC, Lgt, SPase II | 0031226, 0005887, 0046658, 0009986 |
| Lmo0641 | Heavy metal translocating P-type ATPase                                      | msIMP-Lipoprotein | Sec, YidC, Lgt, SPase II | 0031226, 0005887, 0046658, 0009986 |
| Lmo1379 | YidC insertase, OxaA-like protein, OxaA1 (YqjG)                              | msIMP-Lipoprotein | Sec, YidC, Lgt, SPase II | 0031226, 0005887, 0046658, 0009986 |
| Lmo2687 | Cell division protein, FtsW                                                  | msIMP-Lipoprotein | Sec, YidC, Lgt, SPase II | 0031226, 0005887, 0046658, 0009986 |
| Lmo2854 | YidC insertase, OxaA-like protein, OxaA2 (SpoIIIJ)                           | msIMP-Lipoprotein | Sec, YidC, Lgt, SPase II | 0031226, 0005887, 0046658, 0009986 |

<sup>a</sup>Some annotations were corrected respective to the homology search performed as described in the Material & Methods section. More extensive and detailed annotations are available in Table 1S.

<sup>b</sup>Single-spanning IMP (ss-IMP) are categorized into (i) Type I, *i.e.* IMP exhibiting a cleavable SP in addition to another TMD positioned upstream, (ii) Type II, *i.e.* IMP exhibiting a signal anchor, which is a TMD with N<sub>in</sub>-C<sub>out</sub> orientation (Type I module), that could be an uncleaved SP (Unc-SP), (iii) Type III, *i.e.* IMP exhibiting an reverse signal-anchor, which is a TMD with N<sub>out</sub>-C<sub>in</sub> orientation (Type II module).

<sup>c</sup>Subcellular location follow the GO (Gene Ontology) for cellular component. Besides location to intrinsic to the cytoplasmic membrane (GO:0031226), IMPs are more precisely integral to cytoplasmic membrane (GO:0005887) and consequently at cell surface (GO:0009986).
