# Supplementary material for: Subcellular Localization of Extracytoplasmic Proteins in Monoderm Bacteria: Rational Secretomics-Based Strategy for Genomic and Proteomic Analyses
Source: PubMed Central journal article supplement (PMC3415414; doi:10.1371/journal.pone.0042982), 2012-08-09
Supplement: pone.0042982.s003.pdf [file pone.0042982.s003.pdf]

Table 3S: The 74 lipoproteins in *L. monocytogenes* EGD-e as revealed by the secretomics-based method.

| Protein ID | Annotation <sup>a</sup>                                                                      | Protein category | Secretion pathway <sup>b</sup> | GO <sup>c</sup>                   |
|------------|----------------------------------------------------------------------------------------------|------------------|--------------------------------|-----------------------------------|
| Lmo0047    | Peptidase M4, PepSY                                                                          | Lipoprotein      | Sec, Lgt, SPase II             | 0031226, 0046658, 0009986         |
| Lmo0135    | ABC-type dipeptide transport system, substrate-binding protein family 5 component            | Lipoprotein      | Sec, Lgt, SPase II             | 0031226, 0046658, 0009986,0005576 |
| Lmo0152    | ABC-type oligopeptide transport system, substrate-binding protein family 5 component         | Lipoprotein      | Sec, Lgt, SPase II             | 0031226, 0046658, 0009986,0005576 |
| Lmo0153    | ABC-type metal ion transport system, substrate-binding protein component, surface adhesin    | Lipoprotein      | Sec, Lgt, SPase II             | 0031226, 0046658, 0009986,0005576 |
| Lmo0181    | ABC-type sugar transport system, substrate-binding protein family 1 component                | Lipoprotein      | Sec, Lgt, SPase II             | 0031226, 0046658, 0009986,0005576 |
| Lmo0207    | Lipoprotein of unknown function with DUF1307 domain, YehR-like, COG4808                      | Lipoprotein      | Sec, Lgt, SPase II             | 0031226, 0046658, 0009986,0005576 |
| Lmo0255    | Lipoprotein of unknown function with DUF1307 domain, YehR-like, COG4808                      | Lipoprotein      | Sec, Lgt, SPase II             | 0031226, 0046658, 0009986,0005576 |
| Lmo0285    | ABC-type metal ion transport system, substrate-binding protein component, surface antigen    | Lipoprotein      | Sec, Lgt, SPase II             | 0031226, 0046658, 0009986,0005576 |
| Lmo0303    | Protein of unknown function, lysin rich                                                      | Lipoprotein      | Sec, Lgt, SPase II             | 0031226, 0046658, 0009986,0005576 |
| Lmo0324    | Protein of unknown function                                                                  | Lipoprotein      | Sec, Lgt, SPase II             | 0031226, 0046658, 0009986         |
| Lmo0355    | Fumarate reductase flavoprotein subunit                                                      | Lipoprotein      | Sec, Lgt, SPase II             | 0031226, 0046658, 0009986,0005576 |
| Lmo0366    | Iron/lead transport substrate-binding protein, YcdO-like, PbrT-like                          | Lipoprotein      | Sec, Lgt, SPase II             | 0031226, 0046658, 0009986         |
| Lmo0460    | Adhesin with RGD motif, LRR (Leucine-rich repeat) and DUF285 domain, RNI-like                | Lipoprotein      | Sec, Lgt, SPase II             | 0031226, 0046658, 0009986,0005576 |
| Lmo0510    | Protein of unknown function                                                                  | Lipoprotein      | Sec, Lgt, SPase II             | 0031226, 0046658, 0009986         |
| Lmo0517    | Phosphoglycerate mutase                                                                      | Lipoprotein      | Sec, Lgt, SPase II             | 0031226, 0046658, 0009986,0005576 |
| Lmo0541    | ABC-type Fe <sup>3+</sup> -hydroxamate transport system, substrate-binding protein component | Lipoprotein      | Sec, Lgt, SPase II             | 0031226, 0046658, 0009986,0005576 |
| Lmo0617    | Protein of unknown function                                                                  | Lipoprotein      | Sec, Lgt, SPase II             | 0031226, 0046658, 0009986,0005576 |
| Lmo0768    | ABC-type sugar transport system, substrate-binding protein family 1 component                | Lipoprotein      | Sec, Lgt, SPase II             | 0031226, 0046658, 0009986,0005576 |
| Lmo0791    | Protein of unknown function, YcdA-like spore lipoprotein                                     | Lipoprotein      | Sec, Lgt, SPase II             | 0031226, 0046658, 0009986,0005576 |
| Lmo0859    | ABC-type trehalose/maltose transport system, substrate-binding protein component             | Lipoprotein      | Sec, Lgt, SPase II             | 0031226, 0046658, 0009986,0005576 |
| Lmo0945    | Metallo-β-lactamase family protein, DNA-binding ComEC/Rec2-like protein                      | Lipoprotein      | Sec, Lgt, SPase II             | 0031226, 0046658, 0009986         |
| Lmo0953    | Protein of unknown function                                                                  | Lipoprotein      | Sec, Lgt, SPase II             | 0031226, 0046658, 0009986         |
| Lmo1016    | ABC-type proline/glycine betaine transport system, substrate-binding protein component       | Lipoprotein      | Sec, Lgt, SPase II             | 0031226, 0046658, 0009986,0005576 |
| Lmo1041    | ABC-type molybdate transport system, substrate-binding protein component                     | Lipoprotein      | Sec, Lgt, SPase II             | 0031226, 0046658, 0009986         |
| Lmo1068    | Protein of unknown function                                                                  | Lipoprotein      | Sec, Lgt, SPase II             | 0031226, 0046658, 0009986,0005576 |
| Lmo1073    | ABC-type Fe <sup>3+</sup> -hydroxamate transport system, substrate-binding protein component | Lipoprotein      | Sec, Lgt, SPase II             | 0031226, 0046658, 0009986,0005576 |
| Lmo1265    | Protein of unknown function                                                                  | Lipoprotein      | Sec, Lgt, SPase II             | 0031226, 0046658, 0009986         |

|         |                                                                                              |             |                    |                                   |
|---------|----------------------------------------------------------------------------------------------|-------------|--------------------|-----------------------------------|
| Lmo1340 | Protein of unknown function, YqgU-like                                                       | Lipoprotein | Sec, Lgt, SPase II | 0031226, 0046658, 0009986         |
| Lmo1388 | CD4+ T-cell stimulating antigen, TcsA, substrate-binding protein ABC transport system        | Lipoprotein | Sec, Lgt, SPase II | 0031226, 0046658, 0009986,0005576 |
| Lmo1426 | ABC-type betaine/choline transport system, osmoprotectant, OpuCC                             | Lipoprotein | Sec, Lgt, SPase II | 0031226, 0046658, 0009986         |
| Lmo1444 | Peptidylprolyl isomerase, foldase, PrsA1                                                     | Lipoprotein | Sec, Lgt, SPase II | 0031226, 0046658, 0009986,0005576 |
| Lmo1649 | Protein of unknown function                                                                  | Lipoprotein | Sec, Lgt, SPase II | 0031226, 0046658, 0009986         |
| Lmo1653 | Protein of unknown function                                                                  | Lipoprotein | Sec, Lgt, SPase II | 0031226, 0046658, 0009986         |
| Lmo1671 | ABC-type metal ion transport system, substrate-binding protein component, surface adhesin    | Lipoprotein | Sec, Lgt, SPase II | 0031226, 0046658, 0009986         |
| Lmo1730 | ABC-type sugar transport system, substrate-binding protein component                         | Lipoprotein | Sec, Lgt, SPase II | 0031226, 0046658, 0009986,0005576 |
| Lmo1738 | ABC-type amino acid transport/signal transduction, surface adhesin                           | Lipoprotein | Sec, Lgt, SPase II | 0031226, 0046658, 0009986         |
| Lmo1757 | Sex pheromone cAM373 biosynthesis, CamS                                                      | Lipoprotein | Sec, Lgt, SPase II | 0031226, 0046658, 0009986         |
| Lmo1800 | Receptor-linked protein tyrosine/serine phosphatase                                          | Lipoprotein | Sec, Lgt, SPase II | 0031226, 0046658, 0009986,0005576 |
| Lmo1847 | ABC transport, metal-binding protein, surface adhesin, lipoprotein promoting entry, LpeA     | Lipoprotein | Sec, Lgt, SPase II | 0031226, 0046658, 0009986         |
| Lmo1903 | Thioredoxin, Bacteriocin transport accessory protein                                         | Lipoprotein | Sec, Lgt, SPase II | 0031226, 0046658, 0009986         |
| Lmo1959 | ABC-type Fe <sup>3+</sup> -hydroxamate transport system, substrate-binding protein component | Lipoprotein | Sec, Lgt, SPase II | 0031226, 0046658, 0009986,0005576 |
| Lmo2007 | ABC-type sugar transport system, substrate-binding protein component                         | Lipoprotein | Sec, Lgt, SPase II | 0031226, 0046658, 0009986,0005576 |
| Lmo2023 | L-aspartate oxidase, NadB                                                                    | Lipoprotein | Sec, Lgt, SPase II | 0031226, 0046658, 0009986         |
| Lmo2079 | Protein of unknown function                                                                  | Lipoprotein | Sec, Lgt, SPase II | 0031226, 0046658, 0009986,0005576 |
| Lmo2080 | Protein of unknown function                                                                  | Lipoprotein | Sec, Lgt, SPase II | 0031226, 0046658, 0009986         |
| Lmo2125 | ABC-type maltose transporter, substrate-binding protein family 1 component                   | Lipoprotein | Sec, Lgt, SPase II | 0031226, 0046658, 0009986,0005576 |
| Lmo2184 | ABC-type Fe <sup>3+</sup> -hydroxamate transport system, substrate-binding protein component | Lipoprotein | Sec, Lgt, SPase II | 0031226, 0046658, 0009986,0005576 |
| Lmo2196 | ABC-type oligopeptide transport system, substrate-binding protein family 5 component         | Lipoprotein | Sec, Lgt, SPase II | 0031226, 0046658, 0009986,0005576 |
| Lmo2219 | Peptidylprolyl isomerase, foldase, PrsA2                                                     | Lipoprotein | Sec, Lgt, SPase II | 0031226, 0046658, 0009986,0005576 |
| Lmo2331 | Protein of unknown function                                                                  | Lipoprotein | Sec, Lgt, SPase II | 0031226, 0046658, 0009986,0005576 |
| Lmo2349 | ABC-type amino acid transport/signal transduction, surface adhesin                           | Lipoprotein | Sec, Lgt, SPase II | 0031226, 0046658, 0009986,0005576 |
| Lmo2416 | Protein of unknown function                                                                  | Lipoprotein | Sec, Lgt, SPase II | 0031226, 0046658, 0009986         |
| Lmo2417 | ABC-type metal ion transport system, substrate-binding protein component, surface antigen    | Lipoprotein | Sec, Lgt, SPase II | 0031226, 0046658, 0009986,0005576 |
| Lmo2431 | ABC-type Fe <sup>3+</sup> -hydroxamate transport system, substrate-binding protein component | Lipoprotein | Sec, Lgt, SPase II | 0031226, 0046658, 0009986,0005576 |
| Lmo2446 | Glycoside hydrolase, family 31                                                               | Lipoprotein | Sec, Lgt, SPase II | 0031226, 0046658, 0009986         |
| Lmo2499 | ABC-type phosphate transport system, substrate-binding protein component                     | Lipoprotein | Sec, Lgt, SPase II | 0031226, 0046658, 0009986,0005576 |
| Lmo2569 | ABC-type oligopeptide transport system, substrate-binding protein component                  | Lipoprotein | Sec, Lgt, SPase II | 0031226, 0046658, 0009986         |
| Lmo2578 | $\alpha/\beta$ hydrolase with a lipobox motif                                                | Lipoprotein | Sec, Lgt, SPase II | 0031226, 0046658, 0009986         |

|         |                                                                              |                     |                          |                                            |
|---------|------------------------------------------------------------------------------|---------------------|--------------------------|--------------------------------------------|
| Lmo2594 | Protein of unknown function                                                  | Lipoprotein         | Sec, Lgt, SPase II       | 0031226, 0046658, 0009986                  |
| Lmo2595 | Protein of unknown function                                                  | Lipoprotein         | Sec, Lgt, SPase II       | 0031226, 0046658, 0009986,0005576          |
| Lmo2636 | Thiamine biosynthesis lipoprotein ApbE-like                                  | Lipoprotein         | Sec, Lgt, SPase II       | 0031226, 0046658, 0009986,0005576          |
| Lmo2637 | Major membrane immunogen, electron transport complex RnfABCDGE type          | Lipoprotein         | Sec, Lgt, SPase II       | 0031226, 0046658, 0009986,0005576          |
| Lmo2642 | Phosphoesterase                                                              | Lipoprotein         | Sec, Lgt, SPase II       | 0031226, 0046658, 0009986                  |
| Lmo2812 | D-alanyl-D-alanine carboxypeptidase                                          | Lipoprotein         | Sec, Lgt, SPase II       | 0031226, 0046658, 0009986                  |
| Lmo2839 | ABC-type sugar transport system, substrate-binding protein component         | Lipoprotein         | Sec, Lgt, SPase II       | 0031226, 0046658, 0009986,0005576          |
| Lmo1136 | Protein of unknown function with LRR (Leucine-rich repeat), internalin-like  | LPXTG-Lipoprotein   | Sec, Lgt, SPase II, SrtA | 0031226, 0046658, 0009275, 0009986         |
| Lmo0013 | AA3-600 quinol oxidase subunit II, QoxA                                      | msIMP-Lipoprotein   | Sec, YidC, Lgt, SPase II | 0031226, 0005887, 0046658, 0009986,0005576 |
| Lmo0269 | ABC-type dipeptide/oligopeptide/nickel transport systems, permease component | msIMP-Lipoprotein   | Sec, YidC, Lgt, SPase II | 0031226, 0005887, 0046658, 0009986         |
| Lmo0641 | Heavy metal translocating P-type ATPase                                      | msIMP-Lipoprotein   | Sec, YidC, Lgt, SPase II | 0031226, 0005887, 0046658, 0009986         |
| Lmo0821 | Protein of unknown function                                                  | ssIMP I-Lipoprotein | Sec, YidC, Lgt, SPase II | 0031226, 0005887, 0046658, 0009986         |
| Lmo1379 | YidC insertase, OxaA-like protein, OxaA1 (YqjG)                              | msIMP-Lipoprotein   | Sec, YidC, Lgt, SPase II | 0031226, 0005887, 0046658, 0009986         |
| Lmo2687 | Bacterial cell division protein, FtsW                                        | msIMP-Lipoprotein   | Sec, YidC, Lgt, SPase II | 0031226, 0005887, 0046658, 0009986         |
| Lmo2793 | Protein of unknown function                                                  | ssIMP I-Lipoprotein | Sec, YidC, Lgt, SPase II | 0031226, 0005887, 0046658, 0009986         |
| Lmo2854 | YidC insertase, OxaA-like protein, OxaA2 (SpoIIIJ)                           | msIMP-Lipoprotein   | Sec, YidC, Lgt, SPase II | 0031226, 0005887, 0046658, 0009986,0005576 |

<sup>a</sup>Some annotations were corrected respective to the similarity search performed as described in the Material & Methods section. More extensive and detailed annotations are available in Table 1S.

<sup>b</sup>Following secretion *via* the Sec translocon, protein exhibiting a signal peptide of Type II (SP II) are taken in charge by the lipoprotein maturation pathway consisting of the prolipoprotein diacylglyceryltransferase (Lgt) and signal peptidases of Type II (SPase II) in *L. monocytogenes* EGD-e (Table 1).

<sup>c</sup>Subcellular location follow the GO (Gene Ontology) for cellular component. Besides location to intrinsic to the cytoplasmic membrane (GO:0031226), lipoproteins are more precisely anchored to cytoplasmic membrane (GO:0046658) and consequently at cell surface (GO:0009986). In some cases, the release of lipoproteins in the extracellular milieu (GO:0005876) can be expected by the presence of a glycine residue at position +2 of the SP cleavage site.
