# Supplementary material for: Subcellular Localization of Extracytoplasmic Proteins in Monoderm Bacteria: Rational Secretomics-Based Strategy for Genomic and Proteomic Analyses
Source: PubMed Central journal article supplement (PMC3415414; doi:10.1371/journal.pone.0042982), 2012-08-09
Supplement: pone.0042982.s004.pdf [file pone.0042982.s004.pdf]

**Table 4S: The 58 secreted proteins anchored to the cell wall in *L. monocytogenes* EGD-e as revealed by the secretomics-based method.**

| Protein ID                | Annotation <sup>a</sup>                                                                   | Protein category | Secretion pathway <sup>b</sup> | GO <sup>c</sup>  |
|---------------------------|-------------------------------------------------------------------------------------------|------------------|--------------------------------|------------------|
| <i>Covalent anchoring</i> |                                                                                           |                  |                                |                  |
| Lmo0130                   | Bifunctional 2',3'-cyclic nucleotide 2'-phosphodiesterase/3'-nucleotidase, CpdB           | LPXTG-protein    | Sec, SPase I, SrtA             | 0009275, 0009986 |
| Lmo0159                   | Collagen-binding protein                                                                  | LPXTG-protein    | Sec, SPase I, SrtA             | 0009275, 0009986 |
| Lmo0160                   | Collagen-binding protein                                                                  | LPXTG-protein    | Sec, SPase I, SrtA             | 0009275, 0009986 |
| Lmo0171                   | Protein of unknown function with LRR (Leucine-rich repeat), PKD, Ig-like, internalin-like | LPXTG-protein    | Sec, SPase I, SrtA             | 0009275, 0009986 |
| Lmo0175                   | Protein of unknown function with PKD, DUF1085 motif                                       | LPXTG-protein    | Sec, SPase I, SrtA             | 0009275, 0009986 |
| Lmo0262                   | Internalin G, InlG, with LRR (Leucine-rich repeat)                                        | LPXTG-protein    | Sec, SPase I, SrtA             | 0009275, 0009986 |
| Lmo0263                   | Internalin H, InlH, with LRR (Leucine-rich repeat)                                        | LPXTG-protein    | Sec, SPase I, SrtA             | 0009275, 0009986 |
| Lmo0264                   | Internalin E, InlE, with LRR (Leucine-rich repeat)                                        | LPXTG-protein    | Sec, SPase I, SrtA             | 0009275, 0009986 |
| Lmo0320                   | Virulence protein with LPXTG motif, Vip, recognition of Gp96 receptor                     | LPXTG-protein    | Sec, SPase I, SrtA             | 0009275, 0009986 |
| Lmo0327                   | Protein of unknown function with LRR (Leucine-rich repeat), DUF1085, internalin-like      | LPXTG-protein    | Sec, SPase I, SrtA             | 0009275, 0009986 |
| Lmo0331                   | Protein of unknown function with LRR (Leucine-rich repeat), PKD motif, internalin-like    | LPXTG-protein    | Sec, SPase I, SrtA             | 0009275, 0009986 |
| Lmo0333                   | Internalin I, InlI, with LRR (Leucine-rich repeat), PKD motif                             | LPXTG-protein    | Sec, SPase I, SrtA             | 0009275, 0009986 |
| Lmo0409                   | Internalin F, InlF, with LRR (Leucine-rich repeat)                                        | LPXTG-protein    | Sec, SPase I, SrtA             | 0009275, 0009986 |
| Lmo0433                   | Internalin A, InlA, with LRR (Leucine-rich repeat)                                        | LPXTG-protein    | Sec, SPase I, SrtA             | 0009275, 0009986 |
| Lmo0435                   | Biofilm-associated protein, BapL                                                          | LPXTG-protein    | Sec, SPase I, SrtA             | 0009275, 0009986 |
| Lmo0463                   | Protein of unknown function                                                               | LPXTG-protein    | Sec, SPase I, SrtA             | 0009275, 0009986 |
| Lmo0514                   | Protein of unknown function with LRR (Leucine-rich repeat), PKD motif, internalin-like    | LPXTG-protein    | Sec, SPase I, SrtA             | 0009275, 0009986 |
| Lmo0550                   | Protein of unknown function with LPXTG motif, CscD-like                                   | LPXTG-protein    | Sec, SPase I, SrtA             | 0009275, 0009986 |
| Lmo0610                   | Protein of unknown function with LRR (Leucine-rich repeat), PKD motif, internalin-like    | LPXTG-protein    | Sec, SPase I, SrtA             | 0009275, 0009986 |
| Lmo0627                   | Collagen-binding protein                                                                  | LPXTG-protein    | Sec, SPase I, SrtA             | 0009275, 0009986 |
| Lmo0725                   | Protein of unknown function                                                               | LPXTG-protein    | Sec, SPase I, SrtA             | 0009275, 0009986 |
| Lmo0732                   | Protein of unknown function with LRR, DUF1085, bacterial Ig-like, internalin-like         | LPXTG-protein    | Sec, SPase I, SrtA             | 0009275, 0009986 |
| Lmo0801                   | Protein of unknown function with LRR (Leucine-rich repeat), PKD motif, internalin-like    | LPXTG-protein    | Sec, SPase I, SrtA             | 0009275, 0009986 |
| Lmo0835                   | Protein of unknown function                                                               | LPXTG-protein    | Sec, SPase I, SrtA             | 0009275, 0009986 |
| Lmo0842                   | Invasin/intimin cell-adhesion protein with bacterial Ig-like domain                       | LPXTG-protein    | Sec, SPase I, SrtA             | 0009275, 0009986 |
| Lmo1115                   | Collagen-binding protein                                                                  | LPXTG-protein    | Sec, SPase I, SrtA             | 0009275, 0009986 |

|                               |                                                                                        |                       |                          |                                    |
|-------------------------------|----------------------------------------------------------------------------------------|-----------------------|--------------------------|------------------------------------|
| Lmo1289                       | Protein of unknown function with LRR (Leucine-rich repeat), PKD motif, internalin-like | LPXTG-protein         | Sec, SPase I, SrtA       | 0009275, 0009986                   |
| Lmo1290                       | Internalin K, InlK, Recruitment of the Major Vault Protein, with PKD motif             | LPXTG-protein         | Sec, SPase I, SrtA       | 0009275, 0009986                   |
| Lmo1413                       | Protein of unknown function with DUF1085 domain                                        | LPXTG-protein         | Sec, SPase I, SrtA       | 0009275, 0009986                   |
| Lmo1666                       | Bacterial adhesin with hyalin, cadherin domains, PKD repeats and RGD motif             | LPXTG-protein         | Sec, SPase I, SrtA       | 0009275, 0009986                   |
| Lmo1799                       | Protein of unknown function with Ig fold, transmembrane, ATPase                        | LPXTG-protein         | Sec, SPase I, SrtA       | 0009275, 0009986                   |
| Lmo2026                       | Protein of unknown function with LRR, DUF1085, bacterial Ig-like, internalin-like      | LPXTG-protein         | Sec, SPase I, SrtA       | 0009275, 0009986                   |
| Lmo2085                       | Collagen-binding protein                                                               | LPXTG-protein         | Sec, SPase I, SrtA       | 0009275, 0009986                   |
| Lmo2178                       | Collagen-binding protein                                                               | LPXTG-protein         | Sec, SPase I, SrtA       | 0009275, 0009986                   |
| Lmo2179                       | Protein of unknown function with DUF1085 domain, Cna-like                              | LPXTG-protein         | Sec, SPase I, SrtA       | 0009275, 0009986                   |
| Lmo2185                       | Surface virulence-associated protein, SvpA (P64), NEAr transporter                     | LPXTG-protein         | Sec, SPase I, SrtB       | 0009275, 0009986                   |
| Lmo2186                       | Surface virulence-associated protein, SvpB, NEAr transporter                           | LPXTG-protein         | Sec, SPase I, SrtB       | 0009275, 0009986                   |
| Lmo2396                       | Protein of unknown function with LRR (Leucine-rich repeat), DUF1085, internalin-like   | LPXTG-protein         | Sec, SPase I, SrtA       | 0009275, 0009986                   |
| Lmo2576                       | Collagen-binding protein                                                               | LPXTG-protein         | Sec, SPase I, SrtA       | 0009275, 0009986                   |
| Lmo2714                       | Protein of unknown function                                                            | LPXTG-protein         | Sec, SPase I, SrtA       | 0009275, 0009986                   |
| Lmo2821                       | Internalin J, InlJ, with LRR (Leucine-rich repeat)                                     | LPXTG-protein         | Sec, SPase I, SrtA       | 0009275, 0009986                   |
| Lmo0880                       | Collagen-binding protein with peptidoglycan-binding LysMs                              | LPXTG-LysM-protein    | Sec, SPase I, SrtA       | 0009275, 0009986                   |
| Lmo1136                       | Protein of unknown function with LRR (Leucine-rich repeat), internalin-like            | LPXTG-Lipoprotein     | Sec, Lgt, SPase II, SrtA | 0031226, 0046658, 0009275, 0009986 |
| <i>Non-covalent anchoring</i> |                                                                                        |                       |                          |                                    |
| Lmo0582                       | Cell-wall hydrolase, protein of 60 KDa (P60), invasion associated protein, Iap         | LysM-protein          | Sec, SPase I             | 0009275, 0009986                   |
| Lmo2522                       | Protein of unknown function                                                            | LysM-protein          | Sec, SPase I             | 0009275, 0009986                   |
| Lmo2691                       | Autolysin, N-acetylmuramoyl-L-alanine amidase, MurA                                    | LysM-protein          | Sec, SPase I             | 0009275, 0009986                   |
| Lmo1303                       | Cell division suppressor protein, YneA                                                 | ssIMP II-LysM-protein | Sec, YidC                | 0031226, 0005887, 0009275, 0009986 |
| Lmo1941                       | Protein of unknown function, YpbE-like, ATPase                                         | ssIMP II-LysM-protein | Sec, YidC                | 0031226, 0005887, 0009275, 0009986 |
| Lmo0549                       | Protein of unknown function with LRR (Leucine-rich repeat), CscB-like                  | WXL-protein           | Sec, SPase I             | 0009275, 0009986                   |
| Lmo0551                       | Protein of unknown function, CscB-like                                                 | WXL-protein           | Sec, SPase I             | 0009275, 0009986                   |
| Lmo0585                       | Protein of unknown function, CscB-like                                                 | WXL-protein           | Sec, SPase I             | 0009275, 0009986                   |
| Lmo0587                       | Protein of unknown function, CscB-like                                                 | WXL-protein           | Sec, SPase I             | 0009275, 0009986                   |
| Lmo0434                       | Internalin B, InlB, with LRR (Leucine-rich repeat)                                     | GW-protein            | Sec, SPase I             | 0009275, 0009986                   |
| Lmo1076                       | N-acetylmuramoyl-L-alanine amidase, Auto                                               | GW-protein            | Sec, SPase I             | 0009275, 0009986                   |
| Lmo2203                       | N-acetylmuramoyl-L-alanine amidase                                                     | GW-protein            | Sec, SPase I             | 0009275, 0009986                   |
| Lmo2558                       | N-acetylmuramoyl-L-alanine amidase family 2, autolysin, Ami                            | GW-protein            | Sec, SPase I             | 0009275, 0009986                   |

|         |                                    |               |              |                  |
|---------|------------------------------------|---------------|--------------|------------------|
| Lmo2591 | N-acetylmuramoyl-L-alanine amidase | GW-protein    | Sec, SPase I | 0009275, 0009986 |
| Lmo1851 | Peptidase S41                      | PGBD1-protein | Sec, SPase I | 0009275, 0009986 |

<sup>a</sup>Some annotations were corrected respective to the similarity search performed as described in the Material & Methods section. More extensive and detailed annotations are available in Table 1S.

<sup>b</sup>Following secretion *via* the Sec translocon, N-terminal signal peptide of Type I (SP I) is cleaved by signal peptidases of Type I (SPase I) whereas C-terminal LPXTG domain is cleaved and covalently linked to peptidoglycan precursor by sortase A (SrtA) or SrtB in *L. monocytogenes* EGD-e (Table 1).

<sup>c</sup>Subcellular location follow the GO (Gene Ontology) for cellular component. LPXTG-, LysM-, WXL-, GW- and PGBD1-proteins are anchored to the cell wall (GO:0009275) and consequently at cell surface (GO:0009986).
