# Supplementary material for: Subcellular Localization of Extracytoplasmic Proteins in Monoderm Bacteria: Rational Secretomics-Based Strategy for Genomic and Proteomic Analyses
Source: PubMed Central journal article supplement (PMC3415414; doi:10.1371/journal.pone.0042982), 2012-08-09
Supplement: pone.0042982.s005.pdf [file pone.0042982.s005.pdf]

Table 5S: The 16 secreted proteins part of supramolecular cell-surface appendage in *L. monocytogenes* EGD-e as revealed by the secretomics-based method.

| Protein ID          | Annotation <sup>a</sup>                 | Protein Type  | Secretion pathway <sup>b</sup> | GO <sup>c</sup>            |
|---------------------|-----------------------------------------|---------------|--------------------------------|----------------------------|
| <i>Pseudo-pilus</i> |                                         |               |                                |                            |
| Lmo1341             | Type 4 pseudo-prepilin, ComGG           | FPE-substrate | FPE, ComC                      | 0043234, 0009986           |
| Lmo1342             | Type 4 pseudo-prepilin, ComGF           | FPE-substrate | FPE, ComC                      | 0043234, 0009986           |
| Lmo1343             | Type 4 pseudo-prepilin, ComGE           | FPE-substrate | FPE, ComC                      | 0043234, 0009986           |
| Lmo1344             | Type 4 pseudo-prepilin, ComGD           | FPE-substrate | FPE, ComC                      | 0043234, 0009986           |
| Lmo1345             | Type 4 pseudo-prepilin, ComGC           | FPE-substrate | FPE, ComC                      | 0043234, 0009986           |
| <i>Flagellum</i>    |                                         |               |                                |                            |
| Lmo0682             | Flagellar basal body rod protein, FlgG  | FEA-substrate | FEA                            | 0043234, 0009986, 00019861 |
| Lmo0690             | Flagellin, FlaA                         | FEA-substrate | FEA                            | 0043234, 0009986, 00019861 |
| Lmo0695             | Flagellar hook protein, FliK            | FEA-substrate | FEA                            | 0043234, 0009986, 00019861 |
| Lmo0696             | Flagellar hook capping protein, FlgD    | FEA-substrate | FEA                            | 0043234, 0009986, 00019861 |
| Lmo0697             | Flagellar hook protein, FlgE            | FEA-substrate | FEA                            | 0043234, 0009986, 00019861 |
| Lmo0705             | Flagellar hook-associated, FlgK         | FEA-substrate | FEA                            | 0043234, 0009986, 00019861 |
| Lmo0706             | Flagellar hook-associated, FlgL         | FEA-substrate | FEA                            | 0043234, 0009986, 00019861 |
| Lmo0707             | Flagellar capping protein, FliD         | FEA-substrate | FEA                            | 0043234, 0009986, 00019861 |
| Lmo0710             | Flagellar basal body rod protein, FlgB  | FEA-substrate | FEA                            | 0043234, 0009986, 00019861 |
| Lmo0711             | Flagellar basal body rod protein, FlgC  | FEA-substrate | FEA                            | 0043234, 0009986, 00019861 |
| Lmo0712             | Flagellar hook-basal body protein, FliE | FEA-substrate | FEA                            | 0043234, 0009986, 00019861 |

<sup>a</sup>Some annotations were corrected respective to the similarity search performed as described in the Material & Methods section. More extensive and detailed annotations are available in Table 1S.

<sup>b</sup>Pseudo-pilus are secreted and assembled by FPE after cleavage of the signal peptide of class 3 by signal peptidase ComC. Flagellum components are secreted and assembled by FEA (Table 1).

<sup>c</sup>Subcellular location follow the GO (Gene Ontology) for cellular component. Pseudo-pilus and flagellum (GO:00019861) are supramolecular protein complexes (GO:0043234) exposed at cell surface (GO:0009986).
