# Supplementary material for: Subcellular Localization of Extracytoplasmic Proteins in Monoderm Bacteria: Rational Secretomics-Based Strategy for Genomic and Proteomic Analyses
Source: PubMed Central journal article supplement (PMC3415414; doi:10.1371/journal.pone.0042982), 2012-08-09
Supplement: pone.0042982.s006.pdf [file pone.0042982.s006.pdf]

Table 6S: The 80 secreted exoproteins in *L. monocytogenes* EGD-e as revealed by the secretomics-based method.

| Protein ID | Annotation <sup>a</sup>                                             | Secretion pathway <sup>b</sup> | GO <sup>c</sup> |
|------------|---------------------------------------------------------------------|--------------------------------|-----------------|
| Lmo0017    | 5'-nucleotidase/2',3'-cyclic phosphodiesterase, UDP-sugar hydrolase | Sec, SPase I                   | 0005576         |
| Lmo0019    | Cell wall hydrolase with SH3 domain                                 | Sec, SPase I                   | 0005576         |
| Lmo0086    | Protein of unknown function with fibronectin type III-like fold     | Sec, SPase I                   | 0005576         |
| Lmo0087    | Protein of unknown function                                         | Sec, SPase I                   | 0005576         |
| Lmo0105    | Chitinase, ChiB                                                     | Sec, SPase I                   | 0005576         |
| Lmo0201    | Phosphatidylinositol phospholipase C, PlcA                          | Sec, SPase I                   | 0005576         |
| Lmo0202    | Listeriolysin O (Thiol-activated cytolysin) (LLO) Hly (HlyA) (LisA) | Sec, SPase I                   | 0005576         |
| Lmo0203    | Zinc metalloproteinase, Mpl (PrtA)                                  | Sec, SPase I                   | 0005576         |
| Lmo0205    | Phosphatidylcholine phospholipase C, PlcB (prtC)                    | Sec, SPase I                   | 0005576         |
| Lmo0206    | Protein of unknown function                                         | Sec, SPase I                   | 0005576         |
| Lmo0275    | Metallo- $\beta$ -lactamase                                         | Sec, SPase I                   | 0005576         |
| Lmo0394    | NLP/P60-type cell wall hydrolase                                    | Sec, SPase I                   | 0005576         |
| Lmo0408    | Protein of unknown function with DUF1312 domain, COG5341            | Sec, SPase I                   | 0005576         |
| Lmo0412    | Protein of unknown function                                         | Sec, SPase I                   | 0005576         |
| Lmo0415    | Peptidoglycan GlcNAc deacetylase                                    | Sec, SPase I                   | 0005576         |
| Lmo0438    | Nuclear targeted protein A, IntA                                    | Sec, SPase I                   | 0005576         |
| Lmo0461    | Protein of unknown function                                         | Sec, SPase I                   | 0005576         |
| Lmo0462    | Protein of unknown function                                         | Sec, SPase I                   | 0005576         |
| Lmo0516    | Poly- $\beta$ -glutamate biosynthesis enzyme                        | Sec, SPase I                   | 0005576         |
| Lmo0540    | $\beta$ -lactamase-type transpeptidase                              | Sec, SPase I                   | 0005576         |
| Lmo0601    | Protein of unknown function with WD-40 repeat, COG3595              | Sec, SPase I                   | 0005576         |
| Lmo0638    | Protein of unknown function                                         | Sec, SPase I                   | 0005576         |
| Lmo0671    | Protein of unknown function                                         | Sec, SPase I                   | 0005576         |
| Lmo0724    | Protein of unknown function UCP032442 type, COG4990                 | Sec, SPase I                   | 0005576         |
| Lmo0745    | Protein of unknown function                                         | Sec, SPase I                   | 0005576         |
| Lmo0755    | SGNH hydrolase-type esterase                                        | Sec, SPase I                   | 0005576         |
| Lmo0778    | Protein of unknown function                                         | Sec, SPase I                   | 0005576         |

|         |                                                                                              |              |         |
|---------|----------------------------------------------------------------------------------------------|--------------|---------|
| Lmo0849 | Amidase                                                                                      | Sec, SPase I | 0005576 |
| Lmo0881 | Protein of unknown function                                                                  | Sec, SPase I | 0005576 |
| Lmo0950 | Protein of unknown function, $\alpha/\beta$ hydrolase fold, DUF1801 domain, COG4814          | Sec, SPase I | 0005576 |
| Lmo1104 | NLP/P60-type cell wall hydrolase                                                             | Sec, SPase I | 0005576 |
| Lmo1216 | Muramidase flagellum-specific with a single GW domain, FlgJ-type                             | Sec, SPase I | 0005576 |
| Lmo1264 | Metalloprotease with zincin-like fold                                                        | Sec, SPase I | 0005576 |
| Lmo1333 | Aminodeoxychorismate lyase                                                                   | Sec, SPase I | 0005576 |
| Lmo1334 | Protein of unknown function                                                                  | Sec, SPase I | 0005576 |
| Lmo1438 | Cell division protein FtsI/Penicillin-binding protein 2, transpeptidase                      | Sec, SPase I | 0005576 |
| Lmo1518 | Protein of unknown function                                                                  | Sec, SPase I | 0005576 |
| Lmo1521 | N-acetylmuramoyl-L-alanine amidase with a single GW domain, YrvJ-type                        | Sec, SPase I | 0005576 |
| Lmo1585 | Peptidase S49                                                                                | Sec, SPase I | 0005576 |
| Lmo1601 | Protein of unknown function with TMP (tape measure protein) domain, COG4980                  | Sec, SPase I | 0005576 |
| Lmo1602 | Protein of unknown function with DUF948, COG4768                                             | Sec, SPase I | 0005576 |
| Lmo1654 | Metalloprotease with zincin-like fold                                                        | Sec, SPase I | 0005576 |
| Lmo1656 | Protein of unknown function                                                                  | Sec, SPase I | 0005576 |
| Lmo1752 | Protein of unknown function                                                                  | Sec, SPase I | 0005576 |
| Lmo1786 | Internalin C, InlC, with LRR (Leucine-rich repeat)                                           | Sec, SPase I | 0005576 |
| Lmo1855 | Peptidase M15B and M15C, D,D-carboxypeptidase VanY/endolysins                                | Sec, SPase I | 0005576 |
| Lmo1862 | SGNH hydrolase-type esterase                                                                 | Sec, SPase I | 0005576 |
| Lmo1883 | Chitinase, ChiA                                                                              | Sec, SPase I | 0005576 |
| Lmo1913 | Six-hairpin glycosidase-like                                                                 | Sec, SPase I | 0005576 |
| Lmo2027 | Protein of unknown function with leucine-rich repeat (LRR) protein, COG4886, internalin-like | Sec, SPase I | 0005576 |
| Lmo2039 | Cell division protein FtsI/Penicillin-binding protein 2, transpeptidase                      | Sec, SPase I | 0005576 |
| Lmo2074 | $\alpha/\beta$ hydrolase, peptidase S9/S15                                                   | Sec, SPase I | 0005576 |
| Lmo2093 | Sec-translocated protein of unknown function                                                 | Sec, SPase I | 0005576 |
| Lmo2106 | Metallo-dependent phosphatase                                                                | Sec, SPase I | 0005576 |
| Lmo2119 | Protein of unknown function YbbR-like                                                        | Sec, SPase I | 0005576 |
| Lmo2156 | Protein of unknown function YxeA-like with conserved DUF1093 domain                          | Sec, SPase I | 0005576 |
| Lmo2217 | Protein of unknown function, COG4980                                                         | Sec, SPase I | 0005576 |
| Lmo2439 | Protein of unknown function YxeA-like, COG5294                                               | Sec, SPase I | 0005576 |

|         |                                                                                                 |              |         |
|---------|-------------------------------------------------------------------------------------------------|--------------|---------|
| Lmo2444 | Glycosyl hydrolase family 31 with galactose-binding like domains                                | Sec, SPase I | 0005576 |
| Lmo2467 | Chitin binding protein                                                                          | Sec, SPase I | 0005576 |
| Lmo2470 | Protein of unknown function with leucine-rich repeat (LRR) protein, COG4886, internalin-like    | Sec, SPase I | 0005576 |
| Lmo2504 | Peptidase M23                                                                                   | Sec, SPase I | 0005576 |
| Lmo2505 | Peptidoglycan lytic protein P45 (protein of 45 kDa), Spl (secreted protein with lytic property) | Sec, SPase I | 0005576 |
| Lmo2568 | Protein of unknown function YxeA-like, COG5294                                                  | Sec, SPase I | 0005576 |
| Lmo2639 | Protein of unknown function with DUF1312 domain, COG5341                                        | Sec, SPase I | 0005576 |
| Lmo2686 | Protein of unknown function                                                                     | Sec, SPase I | 0005576 |
| Lmo2713 | YkuD family protein (former ErfK/YbiS/YcfS/YnhG family protein)                                 | Sec, SPase I | 0005576 |
| Lmo2754 | Peptidase S11, D-alanyl-D-alanine carboxypeptidase A                                            | Sec, SPase I | 0005576 |
| Lmo2776 | Bacteriocin, lactococcin 972                                                                    | Sec, SPase I | 0005576 |
| Lmo0367 | Dyp-type peroxidase                                                                             | Tat, SPase I | 0005576 |
| Lmo0335 | Bacteriocin, class II microcin                                                                  | ABC          | 0005576 |
| Lmo0615 | Bacteriocin                                                                                     | ABC          | 0005576 |
| Lmo2574 | Bacteriocin                                                                                     | ABC          | 0005576 |
| Lmo2753 | Bacteriocin leaderless                                                                          | ABC          | 0005576 |
| Lmo0129 | Cell wall hydrolase, autolysin                                                                  | Holin        | 0005576 |
| Lmo2278 | Endolysin Ply118                                                                                | Holin        | 0005576 |
| Lmo2284 | Polygalacturonase                                                                               | Holin        | 0005576 |
| Lmo0056 | WXG100-A, Lmesat6                                                                               | Wss          | 0005576 |
| Lmo0062 | WXG100 protein secretion system, peripheral component, EsaC                                     | Wss          | 0005576 |
| Lmo0063 | WXG100-B                                                                                        | Wss          | 0005576 |

<sup>a</sup>Some annotations were corrected respective to the similarity search performed as described in the Material & Methods section. More extensive and detailed annotations are available in Table 1S.

<sup>b</sup>Exoprotein with a SP is cleaved by signal peptidase of Type I (SPase I) when secreted *via* Sec or Tat or concomitantly to secretion *via* ABC transporter (Table 1).

<sup>c</sup>Subcellular location follow the GO (Gene Ontology) for cellular component. Exoprotein as released into the extracellular milieu (GO:0005576).
