# Supplementary material for: Subcellular Localization of Extracytoplasmic Proteins in Monoderm Bacteria: Rational Secretomics-Based Strategy for Genomic and Proteomic Analyses
Source: PubMed Central journal article supplement (PMC3415414; doi:10.1371/journal.pone.0042982), 2012-08-09
Supplement: pone.0042982.s008.pdf [file pone.0042982.s008.pdf]

Table 8S: Secretomic analysis of extracytoplasmic proteins experimentally identified in *L. monocytogenes* EGD-e.

| Protein ID        | Annotation <sup>a</sup>                                                 | Secretomic analysis       |                  |                                |                 | Experimental analysis |                                |                  | References       |
|-------------------|-------------------------------------------------------------------------|---------------------------|------------------|--------------------------------|-----------------|-----------------------|--------------------------------|------------------|------------------|
|                   |                                                                         | Protein type <sup>b</sup> | SCL <sup>c</sup> | Secretion pathway <sup>d</sup> | SP <sup>e</sup> | Fraction <sup>f</sup> | Secretion pathway <sup>g</sup> | C+1 <sup>h</sup> |                  |
| <i>Exoprotein</i> |                                                                         |                           |                  |                                |                 |                       |                                |                  |                  |
| Lmo0201           | Phosphatidylinositol phospholipase C, PlcA                              |                           | EC               | Sec;SPase I                    | I (30)          | mb/sn                 |                                | 30               | [1,2,3]          |
| Lmo0202           | Listeriolysin O (LLO), Hly                                              |                           | EC               | Sec;SPase I                    | I (25)          | mb/cw/sn              | SipZ                           | 25               | [1,2,3,4,5,6]    |
| Lmo0203           | Zinc metalloproteinase, Mpl (PrtA)                                      |                           | EC               | Sec;SPase I                    | I (25)          | sn                    |                                |                  | [1,2]            |
| Lmo0205           | Phosphatidylcholine phospholipase C, PlcB (PrtC)                        |                           | EC               | Sec;SPase I                    | I (26)          | mb/sn                 | SipZ                           |                  | [1,2,3,4]        |
| Lmo0412           | Sec-translocated protein of unknown function                            |                           | EC               | Sec;SPase I                    | I (59)          | sn                    |                                |                  | [1]              |
| Lmo0540           | β-lactamase-type transpeptidase                                         |                           | EC               | Sec;SPase I                    | I (47)          | sn                    |                                |                  | [1]              |
| Lmo0601           | Protein of unknown function with WD-40 repeat, COG3595                  |                           | EC               | Sec;SPase I                    | I (29)          | mb                    |                                |                  | [3]              |
| Lmo0950           | Protein of unknown function with DUF1801 domain, COG4814                |                           | EC               | Sec;SPase I                    | I (33)          | mb/se/sn              |                                |                  | [2,3,7]          |
| Lmo1216           | Muramidase flagellum-specific with a single GW domain, FlgJ-type        |                           | EC               | Sec;SPase I                    | I (21)          | sn                    |                                |                  | [2]              |
| Lmo1333           | Aminodeoxychorismate lyase protein family                               |                           | EC               | Sec;SPase I                    | I (33)          | mb/sn                 |                                |                  | [1,2,3]          |
| Lmo1438           | Cell division protein FtsI/Penicillin-binding protein 2, transpeptidase |                           | EC               | Sec;SPase I                    | I (51)          | sn                    |                                |                  | [1,2]            |
| Lmo1521           | N-acetylmuramoyl-L-alanine amidase with a single GW domain, YrvJ-type   |                           | EC               | Sec;SPase I                    | I (30)          | sn                    |                                |                  | [1,2]            |
| Lmo1601           | Protein of unknown function of unknown function, COG4980                |                           | EC               | Sec;SPase I                    | I (26)          | mb                    |                                |                  | [3]              |
| Lmo1602           | Protein of unknown function with DUF948, COG4768                        |                           | EC               | Sec;SPase I                    | I (21)          | mb                    |                                |                  | [3]              |
| Lmo1752           | Protein of unknown function of unknown function                         |                           | EC               | Sec;SPase I                    | I (34)          | sn                    |                                |                  | [1,2]            |
| Lmo1786           | Internalin C, InlC, with LRR                                            |                           | EC               | Sec;SPase I                    | I (34)          | sn                    |                                |                  | [1,2]            |
| Lmo1862           | SGNH hydrolase-type esterase                                            |                           | EC               | Sec;SPase I                    | I (26)          | mb                    |                                |                  | [3]              |
| Lmo1883           | Chitinase, ChiA                                                         |                           | EC               | Sec;SPase I                    | I (30)          | sn                    |                                |                  | [1,2]            |
| Lmo2039           | Cell division protein FtsI/Penicillin-binding protein 2, transpeptidase |                           | EC               | Sec;SPase I                    | I (49)          | se/sn                 | SecA2                          |                  | [1,8]            |
| Lmo2119           | Protein of unknown function, Ybbr-like                                  |                           | EC               | Sec;SPase I                    | I (29)          | mb                    |                                |                  | [3]              |
| Lmo2156           | Protein of unknown function YxeA-like with DUF1093 domain               |                           | EC               | Sec;SPase I                    | I (31)          | sn                    |                                |                  | [1,2]            |
| Lmo2504           | Peptidase M23                                                           |                           | EC               | Sec;SPase I                    | I (26)          | sn                    |                                |                  | [1,2]            |
| Lmo2505           | Peptidoglycan lytic protein P45 (protein of 45 kDa), Spl                |                           | EC               | Sec;SPase I                    | I (28)          | mb/cw/se/sn           |                                | 28               | [1,2,3,6,7,9,10] |
| Lmo2754           | Peptidase S11, D-alanyl-D-alanine carboxypeptidase A                    |                           | EC               | Sec;SPase I                    | I (32)          | sn                    |                                |                  | [2]              |
| Lmo0129           | Cell wall hydrolase, autolysin                                          |                           | EC               | Holin                          | -               | sn                    |                                |                  | [2]              |
| Lmo2574           | Bacteriocin                                                             |                           | EC               | ABC                            | ABC (21)        | mb                    |                                |                  | [3]              |
| <i>CW-protein</i> |                                                                         |                           |                  |                                |                 |                       |                                |                  |                  |
| Lmo0130           | Bifunctional phosphodiesterase/nucleotidase, CpdB                       | LPXTG                     | CW/CS            | Sec;SPase I-SrtA               | I (35)          | cw/sn                 | SrtA                           | 35               | [1,6,9,10]       |
| Lmo0160           | Collagen-binding protein with LPXTG domain                              | LPXTG                     | CW/CS            | Sec;SPase I-SrtA               | I (37)          | cw                    | SrtA                           |                  | [6,9,10]         |

|            |                                                              |               |          |                  |        |             |            |                          |
|------------|--------------------------------------------------------------|---------------|----------|------------------|--------|-------------|------------|--------------------------|
| Lmo0262    | Internalin G, InlG, with LRR and LPXTG domain                | LPXTG         | CW/CS    | Sec;SPase I-SrtA | I (28) | cw          | SrtA       | [6,9,10]                 |
| Lmo0263    | Internalin H, InlH, with LRR and LPXTG domain                | LPXTG         | CW/CS    | Sec;SPase I-SrtA | I (31) | cw/se/sn    | SrtA       | [2,6,9,10,11]            |
| Lmo0320    | Virulence protein, Vip, recognition of Gp96 receptor         | LPXTG         | CW/CS    | Sec;SPase I-SrtA | I (32) | se          |            | [12]                     |
| Lmo0327    | Protein of unknown function, DUF1085, internalin-like        | LPXTG         | CW/CS    | Sec;SPase I-SrtA | I (27) | cw          | SrtA       | [6,9,10]                 |
| Lmo0331    | Protein of unknown function with LRR, PKD, internalin-like   | LPXTG         | CW/CS    | Sec;SPase I-SrtA | I (28) | cw          |            | [6]                      |
| Lmo0333    | Internalin I, InlI, with LRR, PKD motif                      | LPXTG         | CW/CS    | Sec;SPase I-SrtA | I (29) | cw          |            | [6]                      |
| Lmo0433    | Internalin A, InlA, with LRR                                 | LPXTG         | CW/CS    | Sec;SPase I-SrtA | I (36) | cw/se/sn    | SipZX,SrtA | [2,4,6,9,10,13,14]       |
| Lmo0435    | Biofilm-associated protein, BapL                             | LPXTG         | CW/CS    | Sec;SPase I-SrtA | I (30) | cw          |            | [6]                      |
| Lmo0514    | Protein of unknown function with LRR, PKD motif, internalin  | LPXTG         | CW/CS    | Sec;SPase I-SrtA | I (27) | cw          |            | [6]                      |
| Lmo0610    | Protein of unknown function with LRR, PKD motif, internalin  | LPXTG         | CW/CS    | Sec;SPase I-SrtA | I (29) | cw          | SrtA       | [6,9,10]                 |
| Lmo0842    | Invasin/intimin cell-adhesion protein with Ig-like motif     | LPXTG         | CW/CS    | Sec;SPase I-SrtA | I (34) | cw          | SrtA       | [6,9,10]                 |
| Lmo0880    | Collagen-binding protein                                     | LPXTG-LysM    | CW/CS    | Sec;SPase I-SrtA | I (26) | cw/sn       | SrtA       | [2,6,9,10]               |
| Lmo1290    | Internalin K, InlK, Recruitment of the Major Vault Protein   | LPXTG         | CW/CS    | Sec;SPase I-SrtA | I (31) | se          |            | [15]                     |
| Lmo1413    | Protein of unknown function with DUF1085 motif               | LPXTG         | CW/CS    | Sec;SPase I-SrtA | I (30) | cw          | SrtA       | [6,9,10]                 |
| Lmo1666    | Bacterial adhesin, hyaline/cadherin domain, RGD motif        | LPXTG         | CW/CS    | Sec;SPase I-SrtA | I (27) | cw/sn       | SrtA       | [2] [6,9,10]             |
| Lmo2085    | Collagen-binding protein                                     | LPXTG         | CW/CS    | Sec;SPase I-SrtA | I (28) | cw          | SrtA       | [6,9,10]                 |
| Lmo2178    | Collagen-binding protein                                     | LPXTG         | CW/CS    | Sec;SPase I-SrtA | I (30) | cw          |            | [6]                      |
| Lmo2185    | Surface virulence-associated protein, SvpA, NEAr transporter | LPXTG         | CW/CS    | Sec;SPase I-SrtB | I (29) | cw/se/sn    | SrtB       | [2,6,9,10,16,17,18]      |
| Lmo2186    | Surface virulence-associated protein, SvpB, NEAr transporter | LPXTG         | CW/CS    | Sec;SPase I-SrtB | I (28) | cw/sn       | SrtB       | [2,6,9,10]               |
| Lmo2714    | Protein of unknown function                                  | LPXTG         | CW/CS    | Sec;SPase I-SrtA | I (27) | cw/sn       | SrtA       | [1,2,6,9,10]             |
| Lmo2821    | Internalin J, InlJ, with LRR (Leucine-rich repeat)           | LPXTG         | CW/CS    | Sec;SPase I-SrtA | I (26) | se          |            | [19]                     |
| Lmo0585    | Sec-translocated protein of unknown function, CscB-like      | WXL           | CW/CS    | Sec;SPase I      | I (27) | sn          |            | [1]                      |
| Lmo1851    | Peptidase S41                                                | PGBD1         | CW/CS    | Sec;SPase I      | I (57) | mb/sn       |            | [2,3]                    |
| Lmo0434    | Internalin B, InlB, with LRR (Leucine-rich repeat)           | GW            | CW/CS    | Sec;SPase I      | I (36) | se/sn       | SipZ       | [2,4,7,20]               |
| Lmo2203    | N-acetylmuramoyl-L-alanine amidase                           | GW            | CW/CS    | Sec;SPase I      | I (36) | sn          |            | [1]                      |
| Lmo2558    | N-acetylmuramoyl-L-alanine amidase family 2, autolysin, Ami  | GW            | CW/CS    | Sec;SPase I      | I (31) | se/sn       | GW         | [2,7,21]                 |
| Lmo1076    | N-acetylmuramoyl-L-alanine amidase, Auto                     | GW            | CW/CS    | Sec;SPase I      | I (27) | se/sn       |            | [2,22]                   |
| Lmo2591    | N-acetylmuramoyl-L-alanine amidase                           | GW            | CW/CS    | Sec;SPase I      | I (27) | sn          |            | [1,2]                    |
| Lmo0582    | Cell-wall hydrolase, invasion associated protein, Iap (P60)  | LysM          | CW/CS    | Sec;SPase I      | I (26) | mb/cw/se/sn | SecA2 26   | [1,2,3,6,7,8,9,10,23,24] |
| Lmo2522    | Protein of unknown function                                  | LysM          | CW/CS    | Sec;SPase I      | I (25) | sn          |            | [1,2]                    |
| Lmo2691    | Autolysin, N-acetylmuramoyl-L-alanine amidase, MurA          | LysM          | CW/CS    | Sec;SPase I      | I (53) | cw/sn       |            | [1,2,6,7,9,10]           |
| Lmo1303    | Cell division suppressor protein, YneA                       | ssIMP II-LysM | MB/CW/CS | Sec;YidC         | SA     | sn          |            | [2]                      |
| Lmo1941    | Protein of unknown function, YpbE-like                       | ssIMP II-LysM | MB/CW/CS | Sec;YidC         | SA     | mb/cw       |            | [3,6]                    |
| <i>IMP</i> |                                                              |               |          |                  |        |             |            |                          |
| Lmo0204    | Actin-assembly inducing protein, ActA                        | ssIMP I       | MB/CS    | Sec;SPase I      | I (30) | mb/cw/sn    | SipZX      | [1,2,3,4,6]              |
| Lmo0289    | Signal transduction Yych protein                             | ssIMP II      | MB/CS    | Sec;YidC         | SA     | mb          |            | [3]                      |
| Lmo0971    | D-alanine esterification of teichoic acid, DltD              | ssIMP II      | MB/CS    | Sec;YidC         | SA     | mb          |            | [3]                      |

|         |                                                                |           |       |             |        |          |           |
|---------|----------------------------------------------------------------|-----------|-------|-------------|--------|----------|-----------|
| Lmo1499 | Aminodeoxychorismate lyase                                     | ssIMP II  | MB/CS | Sec;YidC    | SA     | mb       | [3]       |
| Lmo1547 | Cell shape-determining protein, MreC                           | ssIMP II  | MB/CS | Sec;YidC    | SA     | mb       | [3]       |
| Lmo2410 | Protein of unknown function                                    | ssIMP I   | MB/CS | Sec;SPase I | I (34) | sn       | [2]       |
| Lmo0186 | Protein of unknown function with 3D and G5 domains             | ssIMP II  | MB/CS | Sec;YidC    | SA     | sn       | [1,2]     |
| Lmo0217 | Septum formation initiator                                     | ssIMP II  | MB/CS | Sec;YidC    | SA     | sn       | [2]       |
| Lmo0292 | Serine protease with C-terminal PDZ/DHR/GLGF domain            | ssIMP II  | MB/CS | YidC        | -      | mb/se/sn | [2,3,7]   |
| Lmo0290 | Protein of unknown function, COG4853                           | ssIMP II  | MB/CS | Sec;YidC    | SA     | mb       | [3]       |
| Lmo0392 | Protein of unknown function with DUF1432, COG4864              | ssIMP II  | MB/CS | Sec;YidC    | SA     | mb       | [3]       |
| Lmo0441 | Cell division protein FtsI/Penicillin-binding protein 2        | ssIMP II  | MB/CS | Sec;YidC    | SA     | mb       | [3]       |
| Lmo0443 | Transcriptional regulator                                      | ssIMP II  | MB/CS | Sec;YidC    | SA     | mb/se/sn | [1,2,3,7] |
| Lmo0929 | Sortase A, SrtA                                                | ssIMP II  | MB/CS | Sec;YidC    | SA     | mb       | [3]       |
| Lmo0962 | Listeria epitope, LemA                                         | ssIMP II  | MB/CS | Sec;YidC    | SA     | mb       | [3]       |
| Lmo1026 | Transcriptional regulator                                      | ssIMP II  | MB/CS | Sec;YidC    | SA     | mb       | [3]       |
| Lmo1075 | Teichoic acids export protein ATP-binding subunit              | ssIMP II  | MB/CS | YidC        | -      | mb       | [3]       |
| Lmo1395 | DNA-binding $\lambda$ repressor-like, COG1426                  | ssIMP II  | MB/CS | YidC        | -      | mb/sn    | [2,3]     |
| Lmo1399 | HD superfamily hydrolase                                       | ssIMP II  | MB/CS | Sec;YidC    | SA     | mb       | [3]       |
| Lmo1495 | Protein of unknown function with DUF1510 domain                | ssIMP II  | MB/CS | Sec;YidC    | SA     | mb       | [3]       |
| Lmo1511 | Lysophospholipase                                              | ssIMP II  | MB/CS | Sec;YidC    | SA     | mb       | [3]       |
| Lmo1529 | Sec transcolon, subunit YajC                                   | ssIMP II  | MB/CS | Sec;YidC    | SA     | mb       | [3]       |
| Lmo1663 | Asparagine synthase, glutamine-hydrolyzing                     | ssIMP II  | MB/CS | YidC        | -      | mb       | [3]       |
| Lmo1715 | S-adenosyl-L-methionine-dependent methyltransferase type 11    | ssIMP II  | MB/CS | Sec;YidC    | SA     | sn       | [2]       |
| Lmo1820 | Serine/threonine protein kinase                                | ssIMP II  | MB/CS | YidC        | -      | mb       | [3]       |
| Lmo1861 | Protein of unknown function, COG4698                           | ssIMP II  | MB/CS | Sec;YidC    | SA     | mb       | [3]       |
| Lmo1892 | Carboxypeptidase, PbpA, Glycosyl transferase family 51         | ssIMP II  | MB/CS | Sec;YidC    | SA     | mb/cw    | [3,9,10]  |
| Lmo1898 | Protein of unknown function, COG5353                           | ssIMP II  | MB/CS | Sec;YidC    | SA     | mb       | [3]       |
| Lmo1927 | 3-dehydroquinate synthase, AroB                                | ssIMP II  | MB/CS | YidC        | -      | mb       | [3]       |
| Lmo2036 | UDP-N-acetylmuramoylalanine-D-glutamate ligase, MurD           | ssIMP II  | MB/CS | Sec;YidC    | SA     | mb       | [3]       |
| Lmo2056 | Ca <sup>2+</sup> chelating serine protease with SCP/PR1 domain | ssIMP II  | MB/CS | Sec;YidC    | SA     | mb       | [3]       |
| Lmo2089 | Esterase/lipase                                                | ssIMP II  | MB/CS | Sec;YidC    | SA     | mb       | [3]       |
| Lmo2229 | Carboxypeptidase (penicillin-binding protein)                  | ssIMP II  | MB/CS | Sec;YidC    | SA     | mb       | [3]       |
| Lmo2486 | Protein of unknown function, UCP012569 type, COG3595           | ssIMP II  | MB/CS | Sec;YidC    | SA     | mb       | [3]       |
| Lmo2518 | Transcriptional regulator                                      | ssIMP II  | MB/CS | Sec;YidC    | SA     | mb/sn    | [1,2,3]   |
| Lmo2710 | Protein of unknown function                                    | ssIMP II  | MB/CS | Sec;YidC    | SA     | mb       | [3]       |
| Lmo1351 | Rhodanese-related sulfurtransferase                            | ssIMP III | MB/CS | YidC        | -      | mb       | [3]       |
| Lmo1594 | Negative regulator of septation ring formation                 | ssIMP III | MB/CS | YidC        | -      | mb       | [3]       |
| Lmo2533 | F <sub>0</sub> F <sub>1</sub> ATP synthase, subunit B          | ssIMP III | MB/CS | YidC        | -      | mb       | [3]       |
| Lmo0008 | Cardiolipin synthetase                                         | msIMP     | MB/CS | Sec;YidC    | SA     | mb       | [3]       |

|         |                                                               |       |       |             |        |       |         |
|---------|---------------------------------------------------------------|-------|-------|-------------|--------|-------|---------|
| Lmo0014 | Cytochrome AA3-600 quinol oxidase, subunit I                  | msIMP | MB/CS | YidC        | -      | mb    | [3]     |
| Lmo0015 | Cytochrome AA3-600 quinol oxidase, subunit III                | msIMP | MB/CS | Sec;YidC    | SA     | mb    | [3]     |
| Lmo0098 | Phosphotransferase system, mannose/fructose family IID        | msIMP | MB/CS | YidC        | -      | mb    | [3]     |
| Lmo0136 | ABC-type dipeptide/oligopeptide/nickel transporter, permease  | msIMP | MB/CS | Sec;SPase I | I (33) | mb    | [3]     |
| Lmo0220 | Peptidase M41, FtsH                                           | msIMP | MB/CS | Sec;YidC    | SA     | mb    | [3]     |
| Lmo0234 | Protein of unknown function, PIN domain, COG4956              | msIMP | MB/CS | Sec;SPase I | I (65) | mb    | [3]     |
| Lmo0288 | Signal transduction histidine kinase                          | msIMP | MB/CS | Sec;YidC    | SA     | mb    | [3]     |
| Lmo0296 | Protein of unknown function                                   | msIMP | MB/CS | Sec;YidC    | SA     | mb    | [3]     |
| Lmo0524 | Sulfate permease, transporter MFS superfamily                 | msIMP | MB/CS | Sec;YidC    | SA     | mb    | [3]     |
| Lmo0531 | Protein of unknown function with GGDEF domain                 | msIMP | MB/CS | Sec;YidC    | SA     | mb    | [3]     |
| Lmo0584 | Permease                                                      | msIMP | MB/CS | Sec;YidC    | SA     | mb    | [3]     |
| Lmo0607 | ABC bacteriocin exporter, peptidase, ATP-binding/permease     | msIMP | MB/CS | Sec;YidC    | SA     | mb    | [3]     |
| Lmo0608 | ABC bacteriocin exporters, peptidase, ATP-binding/permease    | msIMP | MB/CS | Sec;YidC    | SA     | mb    | [3]     |
| Lmo0626 | Protein of unknown function                                   | msIMP | MB/CS | Sec;SPase I | I (32) | mb    | [3]     |
| Lmo0644 | Phosphoglycerol transferase, alkaline phosphatase superfamily | msIMP | MB/CS | Sec;YidC    | SA     | sn    | [1,2]   |
| Lmo0650 | Phage infection protein, YhgE                                 | msIMP | MB/CS | Sec;SPase I | I (37) | mb    | [3]     |
| Lmo0653 | Protein of unknown function with DUF975 domain, COG5523       | msIMP | MB/CS | Sec;YidC    | SA     | mb    | [3]     |
| Lmo0680 | Flagellar export apparatus, membrane subunit FlhA             | msIMP | MB/CS | Sec;SPase I | I (42) | sn    | [2]     |
| Lmo0781 | Phosphotransferase system, mannose family IID                 | msIMP | MB/CS | YidC        | -      | mb    | [3]     |
| Lmo0782 | Phosphotransferase system, sorbose-specific IIC subunit       | msIMP | MB/CS | Sec;YidC    | SA     | mb    | [3]     |
| Lmo0841 | Cation transport ATPase                                       | msIMP | MB/CS | Sec;YidC    | SA     | mb    | [3]     |
| Lmo0847 | ABC-type amino acid transport system, permease                | msIMP | MB/CS | Sec;SPase I | I (31) | mb    | [3]     |
| Lmo0927 | Phosphoglycerol transferase, alkaline phosphatase superfamily | msIMP | MB/CS | Sec;YidC    | SA     | mb/sn | [1,2,3] |
| Lmo0933 | Phosphate 4-deoxy-4-formamido-L-arabinose transferase         | msIMP | MB/CS | YidC        | -      | mb    | [3]     |
| Lmo0952 | Protein of unknown function with uncleaved signal peptide     | msIMP | MB/CS | Sec;YidC    | SA     | mb    | [3]     |
| Lmo1015 | ABC-type betaine transport system, permease, GbuB             | msIMP | MB/CS | YidC        | -      | mb    | [3]     |
| Lmo1061 | Signal transduction histidine kinase, BaeS                    | msIMP | MB/CS | Sec;YidC    | SA     | sn    | [2]     |
| Lmo1064 | Mg <sup>2+</sup> and Co <sup>2+</sup> transporters, CorA-like | msIMP | MB/CS | YidC        | -      | mb    | [3]     |
| Lmo1261 | Protein of unknown function with GYF domain                   | msIMP | MB/CS | YidC        | -      | mb    | [3]     |
| Lmo1291 | Acyltransferase family 3                                      | msIMP | MB/CS | Sec;YidC    | SA     | se/sn | [2,7]   |
| Lmo1422 | ABC-type betaine uptake system, bile exclusion system, BileB  | msIMP | MB/CS | YidC        | -      | mb    | [3]     |
| Lmo1424 | Ion transporters of the NRAMP family, MntH-like               | msIMP | MB/CS | Sec;YidC    | SA     | mb    | [3]     |
| Lmo1427 | ABC-type betaine transport systems, permease, OpuCB           | msIMP | MB/CS | YidC        | -      | mb    | [3]     |
| Lmo1440 | Protein of unknown function with DUF1189 domain               | msIMP | MB/CS | Sec;YidC    | SA     | mb    | [3]     |
| Lmo1516 | Ammonium permease                                             | msIMP | MB/CS | YidC        | -      | mb    | [3]     |
| Lmo1527 | Sec transcolon, bifunctional subunit SecDF                    | msIMP | MB/CS | Sec;SPase I | I (24) | mb    | [3]     |
| Lmo1626 | Protein of unknown function                                   | msIMP | MB/CS | Sec;YidC    | SA     | mb    | [3]     |

|         |                                                           |       |       |             |        |       |           |
|---------|-----------------------------------------------------------|-------|-------|-------------|--------|-------|-----------|
| Lmo1637 | ABC transporter, copper enzyme maturation, permease       | msIMP | MB/CS | Sec;YidC    | SA     | mb    | [3]       |
| Lmo1695 | Lysyl-tRNA synthetase                                     | msIMP | MB/CS | Sec;YidC    | SA     | mb    | [3]       |
| Lmo1740 | ABC-type amino acid transport system, permease            | msIMP | MB/CS | YidC        | -      | mb    | [3]       |
| Lmo1741 | Signal transduction histidine kinase                      | msIMP | MB/CS | Sec;YidC    | SA     | mb    | [3]       |
| Lmo1839 | Xanthine/uracil permease, PyrP                            | msIMP | MB/CS | Sec;YidC    | SA     | mb    | [3]       |
| Lmo1853 | Heavy metal translocating P-type ATPase                   | msIMP | MB/CS | YidC        | -      | mb    | [3]       |
| Lmo1884 | Xanthine permease                                         | msIMP | MB/CS | Sec;YidC    | SA     | mb    | [3]       |
| Lmo1919 | Zinc metalloproteinase                                    | msIMP | MB/CS | YidC        | -      | mb    | [3]       |
| Lmo2017 | Phosphatidic acid phosphatase type 2/haloperoxidase       | msIMP | MB/CS | Sec;SPase I | I (29) | mb    | [3]       |
| Lmo2029 | Protein of unknown function, YGGT-like, COG0762           | msIMP | MB/CS | YidC        | -      | mb    | [3]       |
| Lmo2059 | Voltage-gated potassium channel                           | msIMP | MB/CS | Sec;YidC    | SA     | mb    | [3]       |
| Lmo2064 | Large-conductance mechanosensitive channel, MscL          | msIMP | MB/CS | Sec;YidC    | SA     | mb    | [3]       |
| Lmo2120 | Protein of unknown function, COG1624                      | msIMP | MB/CS | YidC        | -      | mb    | [3]       |
| Lmo2140 | ABC-type Na <sup>+</sup> efflux pump, permease component  | msIMP | MB/CS | Sec;SPase I | I (45) | mb    | [3]       |
| Lmo2194 | ABC dipeptide/oligopeptide/nickel transporter, permease   | msIMP | MB/CS | Sec;YidC    | SA     | mb    | [3]       |
| Lmo2195 | ABC dipeptide/oligopeptide/nickel transporter, permease   | msIMP | MB/CS | Sec;YidC    | SA     | mb    | [3]       |
| Lmo2221 | Protein of unknown function, COG4717                      | msIMP | MB/CS | YidC        | -      | mb    | [3]       |
| Lmo2232 | Hemolysin, CBS domains                                    | msIMP | MB/CS | Sec;YidC    | SA     | mb    | [3]       |
| Lmo2254 | Xanthine/uracil/vitamin C permease                        | msIMP | MB/CS | Sec;YidC    | SA     | mb    | [3]       |
| Lmo2287 | Tape measure domain bacteriophage A118                    | msIMP | MB/CS | YidC        | -      | sn    | [2]       |
| Lmo2335 | 2-O-mannosyl-D-glycerate specific PTS transporter         | msIMP | MB/CS | YidC        | -      | mb    | [3]       |
| Lmo2360 | Phage infection protein, YhgE                             | msIMP | MB/CS | Sec;SPase I | I (33) | mb    | [3]       |
| Lmo2367 | Phosphoglucose isomerase                                  | msIMP | MB/CS | YidC        | -      | mb    | [3]       |
| Lmo2371 | ABC transporter, lipoprotein release, permease            | msIMP | MB/CS | Sec;SPase I | I (41) | mb    | [3]       |
| Lmo2418 | ABC-type metal ion transport system, permease             | msIMP | MB/CS | Sec;YidC    | SA     | mb    | [3]       |
| Lmo2469 | Amino acid/polyamine transporter I                        | msIMP | MB/CS | Sec;YidC    | SA     | mb    | [3]       |
| Lmo2503 | Cardiolipin synthetase                                    | msIMP | MB/CS | Sec;YidC    | SA     | mb    | [3]       |
| Lmo2526 | UDP-N-acetylglucosamine enolpyruvyl transferase           | msIMP | MB/CS | YidC        | -      | se/sn | SecA2 [8] |
| Lmo2535 | F <sub>0</sub> F <sub>1</sub> ATP synthase, subunit A     | msIMP | MB/CS | Sec;YidC    | SA     | mb    | [3]       |
| Lmo2550 | Phosphate 4-deoxy-4-formamido-L-arabinose transferase     | msIMP | MB/CS | YidC        | -      | mb/sn | [2,3]     |
| Lmo2612 | Sec translocon, subunit SecY                              | msIMP | MB/CS | Sec;SPase I | I (42) | mb    | [3]       |
| Lmo2638 | NADH dehydrogenase, FAD-containing subunit                | msIMP | MB/CS | YidC        | -      | mb    | [3]       |
| Lmo2681 | K <sup>+</sup> transporting ATPase, B subunit, KdpB       | msIMP | MB/CS | Sec;YidC    | SA     | sn    | [2]       |
| Lmo2715 | ABC cysteine exporter, permease/ATP-binding protein, CydD | msIMP | MB/CS | Sec;YidC    | SA     | mb    | [3]       |
| Lmo2718 | Cytochrome bd-type quinol oxidase, subunit 1, CydA        | msIMP | MB/CS | YidC        | -      | mb    | [3]       |
| Lmo2745 | ABC bacteriocin exporter, peptidase, ATP-binding/permease | msIMP | MB/CS | Sec;SPase I | I (47) | mb    | [3]       |
| Lmo2751 | ABC bacteriocin exporter, peptidase, ATP-binding/permease | msIMP | MB/CS | Sec;YidC    | SA     | mb    | [3]       |

|                    |                                                                                    |            |          |                             |         |            |           |                |
|--------------------|------------------------------------------------------------------------------------|------------|----------|-----------------------------|---------|------------|-----------|----------------|
| Lmo0013            | AA3-600 quinol oxidase subunit II, QoxA                                            | msIMP-Lipo | MB/CS/EC | Sec;YidC-Lgt-SPase II;C+2=G | II (23) | mb/se/sn   |           | [1,2,3,7]      |
| Lmo0641            | Heavy metal translocating P-type ATPase                                            | msIMP-Lipo | MB/CS    | Sec;YidC-Lgt-SPase II       | II (25) | mb         |           | [3]            |
| Lmo2854            | YidC insertase, OxaA-like protein, OxaA2 (SpoIIIJ)                                 | msIMP-Lipo | MB/CS/EC | Sec;YidC-Lgt-SPase II;C+2=G | II (27) | mb         |           | [3]            |
| <i>Lipoprotein</i> |                                                                                    |            |          |                             |         |            |           |                |
| Lmo0047            | Peptidase M4, PepSY                                                                |            | MB/CS    | Sec;Lgt-SPase II            | II (21) | mb/se/*    | Lgt       | [3,7,25]       |
| Lmo0135            | ABC-type dipeptide transport system, substrate-binding protein family 5            |            | MB/CS/EC | Sec;Lgt-SPase II;C+2=G      | II (20) | mb/se/sn/* | Lgt       | [1,2,3,7,25]   |
| Lmo0152            | ABC-type oligopeptide transport system, substrate-binding protein family 5         |            | MB/CS/EC | Sec;Lgt-SPase II;C+2=G      | II (22) | mb/sn/*    | Lgt       | [2,3,25]       |
| Lmo0153            | ABC-type metal ion transport system, substrate-binding protein, surface adhesin    |            | MB/CS/EC | Sec;Lgt-SPase II;C+2=G      | II (21) | mb/sn      |           | [2,3]          |
| Lmo0181            | ABC-type sugar transport system, substrate-binding protein family 1                |            | MB/CS/EC | Sec;Lgt-SPase II;C+2=G      | II (21) | *          | Lgt       | [25]           |
| Lmo0285            | ABC-type metal ion transport system, substrate-binding protein, surface antigen    |            | MB/CS/EC | Sec;Lgt-SPase II;C+2=G      | II (23) | mb/se      |           | [3,7]          |
| Lmo0355            | Fumarate reductase flavoprotein subunit                                            |            | MB/CS/EC | Sec;Lgt-SPase II;C+2=G      | II (22) | mb         |           | [3]            |
| Lmo0541            | ABC-type Fe <sup>3+</sup> -hydroxamate transport system, substrate-binding protein |            | MB/CS/EC | Sec;Lgt-SPase II;C+2=G      | II (23) | mb/*       | Lgt       | [3,25]         |
| Lmo0791            | Lipoprotein of unknown function, YcdA-like spore lipoprotein                       |            | MB/CS/EC | Sec;Lgt-SPase II;C+2=G      | II (21) | mb/se/*    | Lgt       | [3,7,25]       |
| Lmo0945            | Metallo-β-lactamase family protein, DNA-binding ComEC/Rec2-like protein            |            | MB/CS    | Sec;Lgt-SPase II            | II (19) | *          | Lgt       | [25]           |
| Lmo1016            | ABC-type proline/glycine betaine transport system, substrate-binding protein       |            | MB/CS/EC | Sec;Lgt-SPase II;C+2=G      | II (21) | mb         |           | [3]            |
| Lmo1041            | ABC-type molybdate transport system, substrate-binding protein                     |            | MB/CS    | Sec;Lgt-SPase II            | II (19) | mb/se      |           | [3,7]          |
| Lmo1068            | Lipoprotein of unknown function                                                    |            | MB/CS/EC | Sec;Lgt-SPase II;C+2=G      | II (20) | mb/se/sn/* | Lgt       | [1,2,3,7,25]   |
| Lmo1073            | ABC-type Fe <sup>3+</sup> -hydroxamate transport system, substrate-binding protein |            | MB/CS/EC | Sec;Lgt-SPase II;C+2=G      | II (19) | se/*       | Lgt       | [7,25]         |
| Lmo1388            | CD4+ T-cell stimulating antigen, TcsA, ABC transporter, binding protein            |            | MB/CS/EC | Sec;Lgt-SPase II;C+2=G      | II (23) | mb/se/sn/* | SecA2,Lgt | [1,2,3,7,8,25] |
| Lmo1426            | ABC-type choline transport system, osmoprotectant, binding protein, OpuCC          |            | MB/CS    | Sec;Lgt-SPase II            | II (23) | mb/se      |           | [3,7]          |
| Lmo1671            | ABC-type metal ion transport system, substrate-binding protein                     |            | MB/CS    | Sec;Lgt-SPase II            | II (22) | mb/se/sn/* | Lgt       | [2,3,7,25]     |
| Lmo1730            | ABC-type sugar transport system, substrate-binding protein component               |            | MB/CS/EC | Sec;Lgt-SPase II;C+2=G      | II (22) | se         |           | [7]            |
| Lmo1738            | ABC-type signal transduction system, substrate-binding protein family 3            |            | MB/CS    | Sec;Lgt-SPase II            | II (20) | mb/se/sn/* | Lgt       | [2,3,7,25]     |
| Lmo1757            | Sex pheromone cAM373 biosynthesis, CamS                                            |            | MB/CS    | Sec;Lgt-SPase II            | II (18) | mb/se/*    | Lgt       | [3,7,25]       |
| Lmo1800            | Receptor-linked protein tyrosine/serine phosphatase                                |            | MB/CS/EC | Sec;Lgt-SPase II;C+2=G      | II (22) | *          | Lgt       | [25]           |
| Lmo1847            | ABC-type metal transport system, binding protein, surface adhesin, LpeA            |            | MB/CS    | Sec;Lgt-SPase II            | II (19) | mb/se/sn/* | Lgt       | [2,3,7,25,26]  |
| Lmo1959            | ABC-type Fe <sup>3+</sup> -hydroxamate transport system, substrate-binding protein |            | MB/CS/EC | Sec;Lgt-SPase II;C+2=G      | II (21) | mb         |           | [3]            |
| Lmo2079            | Lipoprotein of unknown function                                                    |            | MB/CS/EC | Sec;Lgt-SPase II;C+2=G      | II (21) | sn/*       | Lgt       | [2,25]         |
| Lmo2125            | ABC-type maltose transporter, substrate-binding protein family 1                   |            | MB/CS/EC | Sec;Lgt-SPase II;C+2=G      | II (23) | se         | SecA2     | [8]            |
| Lmo2196            | ABC-type oligopeptide transport system, substrate-binding protein family 5         |            | MB/CS/EC | Sec;Lgt-SPase II;C+2=G      | II (23) | mb/se/sn/* | SecA2,Lgt | [1,2,3,8,25]   |
| Lmo2219            | Peptidylprolyl isomerase, foldase, PrsA2                                           |            | MB/CS/EC | Sec;Lgt-SPase II;C+2=G      | II (21) | mb/se/*    | LspA,Lgt  | [3,7,25,27]    |
| Lmo2331            | Lipoprotein of unknown function                                                    |            | MB/CS/EC | Sec;Lgt-SPase II;C+2=G      | II (22) | mb/se      | Lgt       | [3,7,25]       |
| Lmo2349            | ABC-type signal transduction system, substrate-binding protein family 3            |            | MB/CS/EC | Sec;Lgt-SPase II;C+2=G      | II (21) | mb/sn      |           | [2,3]          |
| Lmo2416            | Lipoprotein of unknown function                                                    |            | MB/CS    | Sec;Lgt-SPase II            | II (21) | sn/*       | Lgt       | [2,25]         |
| Lmo2417            | ABC-type metal ion transport system, substrate-binding protein, surface antigen    |            | MB/CS/EC | Sec;Lgt-SPase II;C+2=G      | II (20) | mb/se/*    | Lgt       | [3,7,25]       |
| Lmo2431            | ABC-type Fe <sup>3+</sup> -hydroxamate transport system, substrate-binding protein |            | MB/CS/EC | Sec;Lgt-SPase II;C+2=G      | II (20) | mb/*       | Lgt       | [3,25]         |
| Lmo2569            | ABC-type oligopeptide transport system, substrate-binding protein                  |            | MB/CS    | Sec;Lgt-SPase II            | II (23) | mb/*       | Lgt       | [3,25]         |

|                    |                                                                    |          |                        |         |            |           |              |
|--------------------|--------------------------------------------------------------------|----------|------------------------|---------|------------|-----------|--------------|
| Lmo2595            | Lipoprotein of unknown function                                    | MB/CS/EC | Sec;Lgt-SPase II;C+2=G | II (22) | *          | Lgt       | [25]         |
| Lmo2636            | Thiamine biosynthesis lipoprotein ApbE-like                        | MB/CS/EC | Sec;Lgt-SPase II;C+2=G | II (20) | mb/se/*    | Lgt       | [3,7,25]     |
| Lmo2637            | Immunogen protein, NADH-(ubi)-quinone oxireductase subunit         | MB/CS/EC | Sec;Lgt-SPase II;C+2=G | II (23) | mb/se/sn/* | SecA2,Lgt | [2,3,7,8,25] |
| <i>Cytoprotein</i> |                                                                    |          |                        |         |            |           |              |
| Lmo0796            | Lipid/polyisoprenoid-binding, YceI-like                            | CP/EC    | NC                     | -       | sn         |           | [1,2]        |
| Lmo0900            | Protein of unknown function with conserved DUF1801 domain, COG5646 | CP/EC    | NC                     | -       | sn         |           | [2]          |
| Lmo1439            | Manganese-superoxide dismutase, MnSOD                              | CP/EC    | NC                     | -       | se/sn      | SecA2     | [1,2,7,28]   |
| Lmo2297            | Phage minor structural GP20                                        | CP/EC    | NC                     | -       | sn         |           | [2]          |
| Lmo2487            | Protein of unknown function YvlB-like, COG3595                     | CP/EC    | NC                     | -       | mb         |           | [3]          |
| Lmo2705            | Polyketide cyclase/dehydrase                                       | CP/EC    | NC                     | -       | mb         |           | [3]          |
| Lmo0020            | DNA-binding transcriptional regulator, FrlR                        | CP       | -                      | -       | mb         |           | [3]          |
| Lmo0044            | 30S ribosomal protein S6, RpsF                                     | CP       | -                      | -       | sn         |           | [2]          |
| Lmo0096            | Phosphotransferase system, sorbose subfamily IIB                   | CP       | -                      | -       | mb         |           | [3]          |
| Lmo0118            | Antigen A, LmaA                                                    | CP       | -                      | -       | sn         |           | [2]          |
| Lmo0119            | Protein of unknown function                                        | CP       | -                      | -       | sn         |           | [2]          |
| Lmo0154            | ABC-type Mn/Zn transport system, ATPase                            | CP       | -                      | -       | mb         |           | [3]          |
| Lmo0194            | ABC-type macrolide transport system, ATPase                        | CP       | -                      | -       | mb         |           | [3]          |
| Lmo0196            | Stage V sporulation protein G                                      | CP       | -                      | -       | sn         |           | [1]          |
| Lmo0197            | Sporulation stage V, protein G                                     | CP       | -                      | -       | mb/se      |           | [3,7]        |
| Lmo0199            | Phosphoribosyl pyrophosphokinase                                   | CP       | -                      | -       | mb         |           | [3]          |
| Lmo0211            | 50S ribosomal protein L25                                          | CP       | -                      | -       | sn         |           | [1]          |
| Lmo0214            | Transcription-repair coupling factor (superfamily II helicase)     | CP       | -                      | -       | se         |           | [7]          |
| Lmo0223            | Cysteine synthase A, CysA                                          | CP       | -                      | -       | mb/se/sn   |           | [1,2,3,7]    |
| Lmo0229            | Transcriptional repressor of class III stress genes                | CP       | -                      | -       | mb         |           | [3]          |
| Lmo0237            | Glutamyl-tRNA synthetase, class Ic                                 | CP       | -                      | -       | mb         |           | [3]          |
| Lmo0248            | 50S ribosomal protein L11, RplK                                    | CP       | -                      | -       | mb         |           | [3]          |
| Lmo0249            | 50S ribosomal protein L1                                           | CP       | -                      | -       | mb         |           | [3]          |
| Lmo0251            | 50S ribosomal protein L7/L12, RplL                                 | CP       | -                      | -       | mb/sn      |           | [2,3]        |
| Lmo0254            | Protein of unknown function                                        | CP       | -                      | -       | mb         |           | [3]          |
| Lmo0258            | DNA-directed RNA polymerase, subunit $\beta$                       | CP       | -                      | -       | se/sn      | SecA2     | [8]          |
| Lmo0259            | DNA-directed RNA polymerase, subunit $\beta$ -prime                | CP       | -                      | -       | se/sn      | SecA2     | [8]          |
| Lmo0284            | ABC-type metal ion transport system, ATPase                        | CP       | -                      | -       | mb         |           | [3]          |
| Lmo0395            | Acyl-CoA N-acyltransferase, GCN5-related, Nat                      | CP       | -                      | -       | sn         |           | [2]          |
| Lmo0407            | Protein of unknown function with DUF1149 domain, COG4835           | CP       | -                      | -       | mb         |           | [3]          |
| Lmo0454            | AAA-type ATPase chaperone, MoxR                                    | CP       | -                      | -       | mb         |           | [3]          |
| Lmo0526            | DNA-binding protein, MerR-like                                     | CP       | -                      | -       | sn         |           | [2]          |
| Lmo0539            | Tagatose-1,6-bisphosphate aldolase                                 | CP       | -                      | -       | sn         |           | [2]          |

|         |                                                                              |    |   |   |          |       |         |
|---------|------------------------------------------------------------------------------|----|---|---|----------|-------|---------|
| Lmo0560 | Glutamate dehydrogenase/leucine dehydrogenase                                | CP | - | - | mb/sn    |       | [2,3]   |
| Lmo0583 | Sec translocase, ATPase, SecA2                                               | CP | - | - | mb       |       | [3]     |
| Lmo0667 | ABC-type multidrug transport system, ATPase                                  | CP | - | - | mb       |       | [3]     |
| Lmo0739 | $\beta$ -glucosidase/6-phospho- $\beta$ -glucosidase/ $\beta$ -galactosidase | CP | - | - | se       |       | [7]     |
| Lmo0756 | ABC-type multidrug transport system, ATPase                                  | CP | - | - | mb       |       | [3]     |
| Lmo0774 | Sphingosine kinase                                                           | CP | - | - | mb       |       | [3]     |
| Lmo0785 | Transcriptional antiterminator                                               | CP | - | - | mb       |       | [3]     |
| Lmo0807 | ABC-type spermidine/putrescine transport system, ATPase                      | CP | - | - | mb       |       | [3]     |
| Lmo0848 | ABC-type polar amino acid transport system, ATPase                           | CP | - | - | mb       |       | [3]     |
| Lmo0851 | Protein of unknown function                                                  | CP | - | - | mb       |       | [3]     |
| Lmo0866 | Superfamily II DNA and RNA helicase                                          | CP | - | - | mb       |       | [3]     |
| Lmo0943 | DNA-binding protein, ferritin-like, Dps type                                 | CP | - | - | mb/sn    |       | [2,3]   |
| Lmo1002 | Phosphotransferase system, phosphocarrier HPr protein                        | CP | - | - | sn       |       | [2]     |
| Lmo1003 | Phosphoenolpyruvate-protein kinase, PTS system EI                            | CP | - | - | mb       |       | [3]     |
| Lmo1014 | ABC-type proline/glycine betaine transport system, ATPase                    | CP | - | - | mb       |       | [3]     |
| Lmo1023 | K <sup>+</sup> transport systems, NAD-binding                                | CP | - | - | mb       |       | [3]     |
| Lmo1053 | Pyruvate/2-oxoglutarate dehydrogenase complex, $\beta$ subunit, PdhB         | CP | - | - | mb/se    |       | [3,7]   |
| Lmo1054 | Dihydrolipoamide acyltransferase (E2)                                        | CP | - | - | mb/se    | SecA2 | [3,7,8] |
| Lmo1055 | Dihydrolipoamide dehydrogenase                                               | CP | - | - | mb/se/sn |       | [1,3,7] |
| Lmo1059 | Disulfide isomerase with thioredoxin-like fold                               | CP | - | - | se       |       | [7]     |
| Lmo1067 | GTP-binding protein TypA                                                     | CP | - | - | mb       |       | [3]     |
| Lmo1072 | Pyruvate carboxylase                                                         | CP | - | - | mb       |       | [3]     |
| Lmo1077 | CDP-glycerol glycerophosphotransferase                                       | CP | - | - | mb       |       | [3]     |
| Lmo1080 | Nucleotide-diphospho-sugar transferase, glycosyl transferase family 2        | CP | - | - | mb/sn    |       | [2,3]   |
| Lmo1084 | dTDP-4-dehydrorhamnose reductase                                             | CP | - | - | mb       |       | [3]     |
| Lmo1087 | Threonine dehydrogenase, Zn-dependent dehydrogenase family                   | CP | - | - | mb       |       | [3]     |
| Lmo1090 | Glycosyltransferase involved in cell wall biogenesis                         | CP | - | - | mb       |       | [3]     |
| Lmo1091 | Glycosyl transferase, family 2                                               | CP | - | - | mb       |       | [3]     |
| Lmo1125 | Protein of unknown function                                                  | CP | - | - | sn       |       | [2]     |
| Lmo1182 | Propanediol utilization protein, PduL                                        | CP | - | - | sn       |       | [2]     |
| Lmo1221 | Phenylalanyl-tRNA synthetase, class IIc, $\alpha$ subunit                    | CP | - | - | mb       |       | [3]     |
| Lmo1222 | Phenylalanyl-tRNA synthetase, class IIc, $\beta$ subunit                     | CP | - | - | mb       |       | [3]     |
| Lmo1267 | Trigger factor, FKBP-type peptidyl-prolyl cis-trans isomerase                | CP | - | - | mb       |       | [3]     |
| Lmo1279 | ATP-dependent protease, HslVU (ClpYQ), ATPase subunit                        | CP | - | - | mb       |       | [3]     |
| Lmo1299 | Glutamine synthetase type I                                                  | CP | - | - | mb       |       | [3]     |
| Lmo1305 | Transketolase, Tkt                                                           | CP | - | - | sn       |       | [2]     |
| Lmo1314 | Ribosome recycling factor                                                    | CP | - | - | se       |       | [7]     |



|         |                                                                              |    |   |   |          |       |             |
|---------|------------------------------------------------------------------------------|----|---|---|----------|-------|-------------|
| Lmo1357 | Acetyl-CoA carboxylase, biotin carboxylase                                   | CP | - | - | mb       |       | [3]         |
| Lmo1360 | Tetrahydrofolate dehydrogenase/cyclohydrolase                                | CP | - | - | mb       |       | [3]         |
| Lmo1364 | Cold shock protein, CspA type                                                | CP | - | - | sn       |       | [1]         |
| Lmo1389 | ABC-type sugar transport system, ATPase component                            | CP | - | - | mb       |       | [3]         |
| Lmo1398 | Recombinase A, RecA                                                          | CP | - | - | mb       |       | [3]         |
| Lmo1421 | ABC-type betaine uptake system, bile exclusion system, BileA                 | CP | - | - | mb       |       | [3]         |
| Lmo1428 | ABC-type proline/glycine betaine transport system, ATPase                    | CP | - | - | mb       |       | [3]         |
| Lmo1435 | Dihydrodipicolinate synthase subfamily                                       | CP | - | - | mb       |       | [3]         |
| Lmo1473 | DnaK class I heat-shock chaperone protein                                    | CP | - | - | mb/se/sn | SecA2 | [1,2,3,7,8] |
| Lmo1475 | Negative transcriptional regulator of class I heat shock protein             | CP | - | - | mb       |       | [3]         |
| Lmo1517 | Nitrogen regulatory protein PII                                              | CP | - | - | mb       |       | [3]         |
| Lmo1519 | Aspartyl-tRNA synthetase                                                     | CP | - | - | mb       |       | [3]         |
| Lmo1544 | Septum site-determining protein, MinD                                        | CP | - | - | mb       |       | [3]         |
| Lmo1548 | Cell shape determining protein MreB/Mrl                                      | CP | - | - | mb       |       | [3]         |
| Lmo1570 | Pyruvate kinase                                                              | CP | - | - | mb       |       | [3]         |
| Lmo1571 | 6-phosphofructokinase, Pfk                                                   | CP | - | - | mb/sn    |       | [2,3]       |
| Lmo1572 | Acetyl-CoA carboxylase, $\alpha$ subunit                                     | CP | - | - | mb       |       | [3]         |
| Lmo1580 | Universal stress protein, UspA, Adenine nucleotide $\alpha$ hydrolases-like  | CP | - | - | mb/sn    |       | [2,3]       |
| Lmo1600 | Phospho-2-dehydro-3-deoxyheptonate aldolase, subtype 2                       | CP | - | - | mb       |       | [3]         |
| Lmo1606 | DNA segregation ATPase FtsK/SpoIIIE                                          | CP | - | - | mb       |       | [3]         |
| Lmo1611 | Peptidase M42                                                                | CP | - | - | mb       |       | [3]         |
| Lmo1634 | Bifunctional aldehyde/alcohol dehydrogenase, listerial adhesion protein, Lap | CP | - | - | se       | SecA2 | [7,29]      |
| Lmo1636 | ABC-type multidrug transport system, ATPase component                        | CP | - | - | mb       |       | [3]         |
| Lmo1641 | Aconitase/iron regulatory protein 2                                          | CP | - | - | mb       |       | [3]         |
| Lmo1647 | Phospholipid/glycerol acyltransferase                                        | CP | - | - | mb       |       | [3]         |
| Lmo1657 | Translation elongation factor Ts                                             | CP | - | - | mb/se/sn |       | [2,3,7]     |
| Lmo1658 | 30S ribosomal protein S2                                                     | CP | - | - | mb       |       | [3]         |
| Lmo1713 | Cell shape determining protein MreB/Mrl                                      | CP | - | - | mb       |       | [3]         |
| Lmo1737 | Glycerol dehydrogenase                                                       | CP | - | - | mb       |       | [3]         |
| Lmo1739 | ABC-type polar amino acid transport system, ATPase component                 | CP | - | - | mb       |       | [3]         |
| Lmo1744 | Nucleoside-diphosphate-sugar epimerases                                      | CP | - | - | mb       |       | [3]         |
| Lmo1755 | Glutamyl-tRNA amidotransferase subunit A, GatA                               | CP | - | - | mb       |       | [3]         |
| Lmo1764 | Phosphoribosylglycinamide synthetase                                         | CP | - | - | mb       |       | [3]         |
| Lmo1765 | Phosphoribosylaminoimidazolecarboxamide formyltransferase, PurH              | CP | - | - | mb/sn    |       | [2,3]       |
| Lmo1769 | Phosphoribosylformylglycinamide synthase II                                  | CP | - | - | mb       |       | [3]         |
| Lmo1773 | Adenylosuccinate lyase, PurB                                                 | CP | - | - | mb/sn    |       | [2,3]       |
| Lmo1774 | Phosphoribosylaminoimidazole carboxylase, ATPase subunit                     | CP | - | - | mb       |       | [3]         |

|         |                                                                        |    |   |   |          |       |             |
|---------|------------------------------------------------------------------------|----|---|---|----------|-------|-------------|
| Lmo1775 | 1-(5-Phosphoribosyl)-5-amino-4-imidazole-carboxylate carboxylase, PurE | CP | - | - | sn       |       | [2]         |
| Lmo1783 | 50S ribosomal protein L20                                              | CP | - | - | mb       |       | [3]         |
| Lmo1809 | Phospholipid biosynthesis protein, PlsX type                           | CP | - | - | mb       |       | [3]         |
| Lmo1829 | Fibronectin-binding protein A, FbpA, with DUF814                       | CP | - | - | mb       | SecA2 | [30]        |
| Lmo1835 | Carbamoyl phosphate synthase, large subunit, glutamine-dependent       | CP | - | - | mb       |       | [3]         |
| Lmo1849 | ABC-type Mn/Zn transport system, ATPase component                      | CP | - | - | mb       |       | [3]         |
| Lmo1867 | Phosphoenolpyruvate synthase/pyruvate phosphate dikinase               | CP | - | - | sn       |       | [2]         |
| Lmo1875 | ABC-type sugar transport system, ATPase component                      | CP | - | - | mb       |       | [3]         |
| Lmo1877 | Formyltetrahydrofolate synthetase                                      | CP | - | - | mb       |       | [3]         |
| Lmo1934 | Histone-like bacterial DNA-binding protein                             | CP | - | - | sn       |       | [2]         |
| Lmo1964 | ABC-type multidrug transport system, ATPase component                  | CP | - | - | mb       |       | [3]         |
| Lmo1967 | Toxic anion resistance protein, Tela type                              | CP | - | - | mb/se    |       | [3,7]       |
| Lmo2016 | Cold-shock protein, DNA-binding                                        | CP | - | - | sn       |       | [2]         |
| Lmo2020 | Cell division initiation protein, DivIVA                               | CP | - | - | mb       |       | [3]         |
| Lmo2021 | Small molecule binding protein with 3H domain                          | CP | - | - | se       |       | [7]         |
| Lmo2030 | Protein of unknown function with DUF552 domain, COG1799                | CP | - | - | mb       |       | [3]         |
| Lmo2032 | Cell division protein, FtsZ                                            | CP | - | - | mb       |       | [3]         |
| Lmo2033 | Cell division protein, FtsA                                            | CP | - | - | mb       |       | [3]         |
| Lmo2035 | N-acetylglucosaminyltransferase, MurG                                  | CP | - | - | mb       |       | [3]         |
| Lmo2068 | Chaperonin GroEL                                                       | CP | - | - | mb/se/sn | SecA2 | [1,2,3,7,8] |
| Lmo2069 | Chaperonin GroES                                                       | CP | - | - | sn       |       | [1,2]       |
| Lmo2103 | Phosphotransacetylase, Pta                                             | CP | - | - | sn       |       | [2]         |
| Lmo2110 | Mannose-6-phosphate isomerase                                          | CP | - | - | se       | SecA2 | [8]         |
| Lmo2114 | ABC-type antimicrobial peptide transport system, ATPase                | CP | - | - | mb       |       | [3]         |
| Lmo2118 | Phosphoglucosamine mutase                                              | CP | - | - | mb       |       | [3]         |
| Lmo2139 | ABC-type multidrug transport system, ATPase                            | CP | - | - | mb       |       | [3]         |
| Lmo2154 | Ribonucleotide-diphosphate reductase, $\beta$ subunit                  | CP | - | - | mb       |       | [3]         |
| Lmo2192 | ABC-type oligopeptide transport system, ATPase                         | CP | - | - | mb       |       | [3]         |
| Lmo2193 | ABC-type dipeptide/oligopeptide/nickel transport system, ATPase        | CP | - | - | mb       |       | [3]         |
| Lmo2206 | Chaperonin ClpB                                                        | CP | - | - | mb       |       | [3]         |
| Lmo2215 | ABC-type multidrug transport system, ATPase                            | CP | - | - | mb       |       | [3]         |
| Lmo2248 | Phosphate transport regulator, distant homolog of PhoU                 | CP | - | - | mb       |       | [3]         |
| Lmo2296 | Bacteriophage coat protein                                             | CP | - | - | sn       |       | [2]         |
| Lmo2323 | Protein of unknown function                                            | CP | - | - | mb       |       | [3]         |
| Lmo2332 | Resolvase                                                              | CP | - | - | mb       |       | [3]         |
| Lmo2372 | ABC-type antimicrobial peptide transport system, ATPase                | CP | - | - | mb       |       | [3]         |
| Lmo2389 | NADH dehydrogenase, FAD-containing subunit                             | CP | - | - | mb       |       | [3]         |

|         |                                                                             |    |   |   |          |       |             |
|---------|-----------------------------------------------------------------------------|----|---|---|----------|-------|-------------|
| Lmo2391 | Nucleoside-diphosphate-sugar epimerase                                      | CP | - | - | mb       |       | [3]         |
| Lmo2411 | ABC-type transport system involved in Fe-S cluster assembly, permease, SufB | CP | - | - | mb       |       | [3]         |
| Lmo2414 | ABC-type transport system involved in Fe-S cluster assembly, permease       | CP | - | - | mb       |       | [3]         |
| Lmo2415 | SUF system FeS cluster assembly, SufC, ATPase                               | CP | - | - | mb/se    |       | [3,7]       |
| Lmo2419 | ABC-type metal ion transport system, ATPase                                 | CP | - | - | mb       |       | [3]         |
| Lmo2425 | Glycine cleavage H-protein, GcvH                                            | CP | - | - | se/sn    |       | [2,7]       |
| Lmo2455 | Enolase                                                                     | CP | - | - | mb/se/sn | SecA2 | [1,2,3,7,8] |
| Lmo2456 | Phosphoglycerate mutase, 2,3-bisphosphoglycerate-independent                | CP | - | - | mb/sn    |       | [1,3,7]     |
| Lmo2458 | Phosphoglycerate kinase                                                     | CP | - | - | se/sn    |       | [1,2,7]     |
| Lmo2459 | Glyceraldehyde-3-phosphate dehydrogenase                                    | CP | - | - | mb/se/sn |       | [1,2,3,7]   |
| Lmo2468 | Peptidase S14, ClpP                                                         | CP | - | - | mb       |       | [3]         |
| Lmo2507 | Cell division ATP-binding protein, FtsE                                     | CP | - | - | mb       |       | [3]         |
| Lmo2510 | Sec translocase, ATPase, SecA                                               | CP | - | - | mb       |       | [3]         |
| Lmo2511 | Ribosomal protein S30Ae/ $\sigma$ 54 modulation protein                     | CP | - | - | se/sn    |       | [1,7]       |
| Lmo2525 | Cell shape determining protein MreB/Mrl                                     | CP | - | - | mb       |       | [3]         |
| Lmo2528 | F <sub>0</sub> F <sub>1</sub> ATP synthase, subunit $\epsilon$              | CP | - | - | mb       |       | [3]         |
| Lmo2529 | F <sub>0</sub> F <sub>1</sub> ATP synthase, subunit $\beta$                 | CP | - | - | mb       |       | [3]         |
| Lmo2530 | F <sub>0</sub> F <sub>1</sub> ATP synthase, subunit $\gamma$                | CP | - | - | mb       |       | [3]         |
| Lmo2531 | F <sub>0</sub> F <sub>1</sub> ATP synthase, subunit $\alpha$                | CP | - | - | mb       |       | [3]         |
| Lmo2532 | F <sub>0</sub> F <sub>1</sub> ATP synthase, subunit $\delta$                | CP | - | - | mb       |       | [3]         |
| Lmo2539 | Glycine/serine hydroxymethyltransferase, GlyA                               | CP | - | - | mb/sn    |       | [2,3]       |
| Lmo2554 | Glycosyl transferase, family 1                                              | CP | - | - | mb       |       | [3]         |
| Lmo2556 | Fructose/tagatose/ketose bisphosphate aldolase class II, FbaA               | CP | - | - | se       |       | [7]         |
| Lmo2557 | Sphingosine kinase                                                          | CP | - | - | mb       |       | [3]         |
| Lmo2580 | ABC-type peptide transport system, ATPase                                   | CP | - | - | mb       |       | [3]         |
| Lmo2596 | 30S ribosomal protein S9                                                    | CP | - | - | mb/se    | SecA2 | [3,8]       |
| Lmo2597 | 50S ribosomal protein L13, RplM                                             | CP | - | - | mb       |       | [3]         |
| Lmo2600 | ABC-type cobalt transport system, ATPase                                    | CP | - | - | mb       |       | [3]         |
| Lmo2601 | ABC-type cobalt transport system, ATPase                                    | CP | - | - | mb       |       | [3]         |
| Lmo2605 | 50S ribosomal protein L17                                                   | CP | - | - | mb       |       | [3]         |
| Lmo2613 | 50S ribosomal protein L15                                                   | CP | - | - | mb       |       | [3]         |
| Lmo2615 | 30S ribosomal protein S5                                                    | CP | - | - | mb       |       | [3]         |
| Lmo2618 | 30S ribosomal protein S8                                                    | CP | - | - | mb       |       | [3]         |
| Lmo2620 | 50S ribosomal protein L5                                                    | CP | - | - | mb       |       | [3]         |
| Lmo2626 | 30S ribosomal protein S3                                                    | CP | - | - | mb       |       | [3]         |
| Lmo2627 | 50S ribosomal protein L22                                                   | CP | - | - | mb       |       | [3]         |
| Lmo2629 | 50S ribosomal protein L2, RplB                                              | CP | - | - | mb       |       | [3]         |

|         |                                                       |    |   |   |          |       |           |
|---------|-------------------------------------------------------|----|---|---|----------|-------|-----------|
| Lmo2631 | 50S ribosomal protein L4                              | CP | - | - | mb/sn    |       | [2,3]     |
| Lmo2632 | 50S ribosomal protein L3                              | CP | - | - | mb       |       | [3]       |
| Lmo2653 | Elongation factor EF-Tu, TufA                         | CP | - | - | mb/se/sn | SecA2 | [2,3,7,8] |
| Lmo2654 | Translation elongation factor EFG/EF2                 | CP | - | - | mb/se    |       | [3,7]     |
| Lmo2756 | DNA topoisomerase III, TopB                           | CP | - | - | mb       |       | [3]       |
| Lmo2758 | Inositol-5-monophosphate dehydrogenase                | CP | - | - | mb       |       | [3]       |
| Lmo2781 | Glycoside hydrolase                                   | CP | - | - | mb       |       | [3]       |
| Lmo2785 | Catalase, Kat                                         | CP | - | - | mb       |       | [3]       |
| Lmo2792 | $\lambda$ repressor-like, DNA-binding domain          | CP | - | - | mb       |       | [3]       |
| Lmo2795 | DNA-binding transcriptional regulator with SIS domain | CP | - | - | ec       |       | [2]       |
| Lmo2853 | RNA-binding protein                                   | CP | - | - | mb       |       | [3]       |

<sup>a</sup>Some annotations were corrected respective to the homology search performed as described in the Methods section. More extensive and detailed annotations are available in Table 1S.

<sup>b</sup>Besides exoproteins, parietal proteins (CW-protein) could be categorized between those covalently anchored to the cell wall via a LPXTG domain (LPXTG) and those attached via non-covalent interaction, namely with GW repeat, LysM, WXL or PGBD1 domains. Considering integral membrane protein (IMP), multi-spanning IMP (msIMP) are discriminated from single-spanning IMP (ssIMP), which are further categorized into (i) Type I (ssIMP I), *i.e.* IMP exhibiting a cleavable SP in addition to another TMD positioned upstream, (ii) Type II (ssIMP II), *i.e.* IMP exhibiting a signal anchor, which is a TMD with N<sub>in</sub>-C<sub>out</sub> orientation (Type I module), that could be an uncleaved SP (Unc), (iii) Type III (ssIMP III), *i.e.* IMP exhibiting an reverse signal-anchor, which is a TMD with N<sub>out</sub>-C<sub>in</sub> orientation (Type II module). Proteins exhibiting a lipobox were predicted as lipoproteins (Lipo) anchored to cytoplasmic membrane.

<sup>c</sup>Subcellular location (SCL) follows the GO (Gene Ontology) for cellular component: cytoplasm (CP; GO:0005737), intrinsic to membrane (MB; GO:0031226), cell wall (CW; GO:0009275), cell surface (CS; GO:0009986) and extracellular milieu (EC; GO:0005576).

<sup>d</sup>The predicted routes follow by the secreted proteins are detailed in terms of (i) translocation system, namely Sec translocon, ABC exporter or holin, as well as membrane integration via YidC or secretion via non-classical way (NC), (ii) post-translocational modification, namely cleavage by signal peptidase of Type I (SPase I) or II (SPase II), protein acylation by the prolipoprotein diacylglyceryltransferase Lgt, covalent anchoring to cell wall by sortase A (SrtA) or B (SrtB), (iii) presence of a glycine residue at position +2 from the cleavage site (C+2=G).

<sup>e</sup>The signal peptide (SP) are differentiated between SP of Type I (I), Type II (II), signal anchor (SA), *i.e.* uncleaved signal peptide, or SP targeting protein to ABC exporter. The position +1 from the cleavage site (C+1) is given in bracket.

<sup>f</sup>Whenever possible, fraction of bacterial cell where the protein was experimentally identified follows the GO (Gene Ontology) for cellular component: membrane fraction (mb; GO:005624), cell wall fraction (cw), surface exposed fraction (se) and supernatant (sn). Asterisk indicates protein identified in supernatant of an isogenic mutant for the Lgt maturation pathway resulting in the release of lipoprotein into the extracellular milieu [25].

<sup>g</sup>Experimental information on the secretion route is provided for SecA2-dependent protein secretion, SP cleavage by signal peptidase of Type I (SPase I) SipX and/or SipZ, or signal peptidase of Type II (SPase II) LspA, covalent protein anchoring to cell wall by sortase A (SrtA) or B (SrtB), non-covalent attachment to cell wall *via* GW repeats, or protein anchoring to the cytoplasmic membrane by the prolipoprotein diacylglyceryltransferase Lgt.

<sup>h</sup>Experimental identification of cleavable SP is provided with the position +1 from the cleavage site (C+1).

## REFERENCES

1. Desvaux M, Dumas E, Chafsey I, Chambon C, Hebraud M (2010) Comprehensive appraisal of the extracellular proteins from a monoderm bacterium: theoretical and empirical exoproteomes of *Listeria monocytogenes* EGD-e by secretomics. *J Proteome Res* 9: 5076-5092.
2. Trost M, Wehmhoner D, Karst U, Dieterich G, Wehland J, et al. (2005) Comparative proteome analysis of secretory proteins from pathogenic and nonpathogenic *Listeria* species. *Proteomics* 5: 1544-1557.
3. Wehmhoner D, Dieterich G, Fischer E, Baumgartner M, Wehland J, et al. (2005) "LaneSpector", a tool for membrane proteome profiling based on sodium dodecyl sulfate-polyacrylamide gel electrophoresis/liquid chromatography-tandem mass spectrometry analysis: application to *Listeria monocytogenes* membrane proteins. *Electrophoresis* 26: 2450-2460.
4. Bonnemain C, Raynaud C, Reglier-Poupet H, Dubail I, Frehel C, et al. (2004) Differential roles of multiple signal peptidases in the virulence of *Listeria monocytogenes*. *Mol Microbiol* 51: 1251-1266.
5. Lety MA, Frehel C, Beretti JL, Berche P, Charbit A (2003) Modification of the signal sequence cleavage site of listeriolysin O does not affect protein secretion but impairs the virulence of *Listeria monocytogenes*. *Microbiology* 149: 1249-1255.
6. Garcia-Del Portillo F, Calvo E, D'Orazio V, Pucciarelli MG (2011) Association of ActA to the peptidoglycan revealed by cell wall proteomics of intracellular *Listeria monocytogenes*. *J Biol Chem*.
7. Schaumburg J, Diekmann O, Hagendorff P, Bergmann S, Rohde M, et al. (2004) The cell wall subproteome of *Listeria monocytogenes*. *Proteomics* 4: 2991-3006.
8. Lenz LL, Mohammadi S, Geissler A, Portnoy DA (2003) SecA2-dependent secretion of autolytic enzymes promotes *Listeria monocytogenes* pathogenesis. *Proc Natl Acad Sci U S A* 100: 12432-12437.
9. Pucciarelli MG, Calvo E, Sabet C, Bierne H, Cossart P, et al. (2005) Identification of substrates of the *Listeria monocytogenes* sortases A and B by a non-gel proteomic analysis. *Proteomics*: 10.1002/pmic.200402075.
10. Calvo E, Pucciarelli MG, Bierne H, Cossart P, Albar JP, et al. (2005) Analysis of the *Listeria* cell wall proteome by two-dimensional nanoliquid chromatography coupled to mass spectrometry. *Proteomics* 5: 433-443.

11. Personnic N, Bruck S, Nahori MA, Toledo-Arana A, Nikitas G, et al. (2010) The stress-induced virulence protein InlH controls interleukin-6 production during murine listeriosis. *Infect Immun* 78: 1979-1989.
12. Cabanes D, Sousa S, Cebria A, Lecuit M, Garcia-del Portillo F, et al. (2005) Gp96 is a receptor for a novel *Listeria monocytogenes* virulence factor, Vip, a surface protein. *Embo J* 24: 2827-2838.
13. Garandeau C, Reglier-Poupet H, Dubail I, Beretti JL, Berche P, et al. (2002) The sortase SrtA of *Listeria monocytogenes* is involved in processing of internalin and in virulence. *Infect Immun* 70: 1382-1390.
14. Gaillard JL, Berche P, Frehel C, Gouin E, Cossart P (1991) Entry of *Listeria monocytogenes* into cells is mediated by internalin, a repeat protein reminiscent of surface antigens from Gram-positive cocci. *Cell* 65: 1127-1141.
15. Dortet L, Mostowy S, Louaka AS, Gouin E, Nahori MA, et al. (2011) Recruitment of the major vault protein by InlK: a *Listeria monocytogenes* strategy to avoid autophagy. *PLoS Pathog* 7: e1002168.
16. Bierne H, Garandeau C, Pucciarelli MG, Sabet C, Newton S, et al. (2004) Sortase B, a new class of sortase in *Listeria monocytogenes*. *J Bacteriol* 186: 1972-1982.
17. Newton SM, Klebba PE, Raynaud C, Shao Y, Jiang X, et al. (2005) The *svpA-srtB* locus of *Listeria monocytogenes*: Fur-mediated iron regulation and effect on virulence. *Mol Microbiol* 55: 927-940.
18. Borezee E, Pellegrini E, Beretti JL, Berche P (2001) SvpA, a novel surface virulence-associated protein required for intracellular survival of *Listeria monocytogenes*. *Microbiology* 147: 2913-2923.
19. Sabet C, Toledo-Arana A, Personnic N, Lecuit M, Dubrac S, et al. (2008) The *Listeria monocytogenes* virulence factor InlJ is specifically expressed in vivo and behaves as an adhesin. *Infect Immun* 76: 1368-1378.
20. Braun L, Dramsi S, Dehoux P, Bierne H, Lindahl G, et al. (1997) InlB: an invasion protein of *Listeria monocytogenes* with a novel type of surface association. *Mol Microbiol* 25: 285-294.
21. Milohanic E, Jonquieres R, Glaser P, Dehoux P, Jacquet C, et al. (2004) Sequence and binding activity of the autolysin-adhesin Ami from epidemic *Listeria monocytogenes* 4b. *Infect Immun* 72: 4401-4409.

22. Cabanes D, Dussurget O, Dehoux P, Cossart P (2004) Auto, a surface associated autolysin of *Listeria monocytogenes* required for entry into eukaryotic cells and virulence. *Mol Microbiol* 51: 1601-1614.
23. Ruhland GJ, Hellwig M, Wanner G, Fiedler F (1993) Cell-surface location of *Listeria*-specific protein p60--detection of *Listeria* cells by indirect immunofluorescence. *J Gen Microbiol* 139: 609-616.
24. Kuhn M, Goebel W (1989) Identification of an extracellular protein of *Listeria monocytogenes* possibly involved in intracellular uptake by mammalian cells. *Infect Immun* 57: 55-61.
25. Baumgärtner M, Kärst U, Gerstel B, Loessner M, Wehland J, et al. (2007) Inactivation of Lgt allows systematic characterization of lipoproteins from *Listeria monocytogenes*. *J Bacteriol* 189: 313-324.
26. Reglier-Poupet H, Pellegrini E, Charbit A, Berche P (2003) Identification of LpeA, a PsaA-like membrane protein that promotes cell entry by *Listeria monocytogenes*. *Infect Immun* 71: 474-482.
27. Reglier-Poupet H, Frehel C, Dubail I, Beretti JL, Berche P, et al. (2003) Maturation of lipoproteins by type II signal peptidase is required for phagosomal escape of *Listeria monocytogenes*. *J Biol Chem* 278: 49469-49477.
28. Archambaud C, Nahori MA, Pizarro-Cerda J, Cossart P, Dussurget O (2006) Control of *Listeria* superoxide dismutase by phosphorylation. *J Biol Chem* 281: 31812-31822.
29. Burkholder KM, Kim KP, Mishra KK, Medina S, Hahm BK, et al. (2009) Expression of LAP, a SecA2-dependent secretory protein, is induced under anaerobic environment. *Microbes Infect* 11: 859-867.
30. Dramsi S, Bourdichon F, Cabanes D, Lecuit M, Fsihi H, et al. (2004) FbpA, a novel multifunctional *Listeria monocytogenes* virulence factor. *Mol Microbiol* 53: 639-649.
